# Supplementary material for: Iridium(iii)- and rhodium(iii)-catalyzed coupling of anilines with α-diazoesters via chelation-assisted C–H activation
Source: Royal Society of Chemistry journal article supplement (doi:10.1039/c5qo00316d), 2015-11-17

*Electronic Supplementary Information*

**Iridium(III)- and Rhodium(III)-Catalyzed Coupling of Anilines with  
 $\alpha$ -Diazoesters via Chelation-Assisted C-H Activation**

Guo-Dong Tang,<sup>a,b</sup> Cheng-Ling Pan,<sup>b</sup> Xingwei Li\*<sup>a</sup>

---

<sup>a</sup> *Dalian Institute of Chemical Physics, Chinese Academy of Sciences, Dalian 116023, China*

<sup>b</sup> *Laboratory of Multi Scale Materials and Molecular Catalysis, School of Materials Science and Engineering, Anhui University of Science and Technology, Huainan, 232001, China*

Email: xwli@dicp.ac.cn

**Contents**

|                                                                     |     |
|---------------------------------------------------------------------|-----|
| 1. General remarks -----                                            | S2  |
| 2. General procedure and characterization data -----                | S2  |
| 3. KIE Studies -----                                                | S10 |
| 4. Crystal data and Structure Refinement for Complex <b>7</b> ----- | S11 |
| 5. NMR spectra -----                                                | S19 |

## 1. General Remarks

All chemicals were obtained from commercial sources and were used as received unless otherwise noted. All reactions were carried out using sealed tube. NMR Spectra were recorded on a Bruker 400 MHz or 500 MHz NMR spectrometer in the solvents indicated. The chemical shift is given in dimensionless  $\delta$  values and is frequency referenced relative to TMS in  $^1\text{H}$  and  $^{13}\text{C}$  NMR spectroscopy. HRMS data were obtained on an Agilent Q-TOF 6540 spectrometer. Column chromatography was performed on silica gel (300-400 mesh) using ethyl acetate (EA)/petroleum ether (PE). *N*-phenylpyridin-2-amine derivatives,<sup>1,2</sup> *N*-phenylpyrimidin-2-amine,<sup>3</sup> and diazo esters<sup>4</sup> were prepared according to literature reports.

## 2. General Procedure and Characterization Data

### General procedure for the preparation of ethyl 2-methyl-1-(pyridin-2-yl)-1H-indole-3-carboxylate (**3aa**)

A mixture of *N*-phenylpyridin-2-amine **1a** (51 mg, 3 mmol, 1.0 equiv),  $[\text{IrCp}^*\text{Cl}_2]_2$  (6 mg, 0.0075 mmol, 2.5 mol%) and CsOAc (14.4 mg, 0.075 mmol, 25 mol%) were weighted into a pressure tube equipped with a stir bar. Water (2 mL), EtOH (1 mL), HOAc (9 mg, 0.15 mmol, 50 mol%) and ethyl diazoacetoacetate **2a** (70.2 mg, 0.45 mmol, 1.5 equiv) were added successively. The mixture was stirred in a sealed tube at 100 °C for 5 h under air. Afterwards, it was cooled to room temperature, and water was removed under reduced pressure and the solid residue was purified by column chromatography to afford pure product **3aa** (74.8 mg, 89% yield).

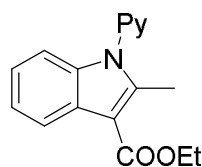

Ethyl 2-methyl-1-(pyridin-2-yl)-1H-indole-3-carboxylate (**3aa**) 89% yield

$^1\text{H}$  NMR (400 MHz,  $\text{CDCl}_3$ )  $\delta$  (ppm) 8.70 (d,  $J = 4.7$  Hz, 1H), 8.19 (d,  $J = 7.9$  Hz, 1H), 7.92 (t,  $J = 7.7$  Hz, 1H), 7.44 – 7.36 (m, 2H), 7.26 (t,  $J = 7.2$  Hz, 1H), 7.23 – 7.14 (m, 2H), 4.43 (q,  $J = 7.1$  Hz, 2H), 2.71 (s, 3H), 1.47 (t,  $J = 7.1$  Hz, 3H).  $^{13}\text{C}$  NMR (101 MHz,  $\text{CDCl}_3$ )  $\delta$  (ppm) 166.1, 150.2, 150.0, 145.1, 138.7, 136.7, 126.8, 123.4, 122.8, 122.4, 122.2, 121.5, 110.4, 106.3, 59.7, 14.6, 13.2. HRMS  $[\text{M} + \text{H}]^+$  calculated for  $\text{C}_{17}\text{H}_{17}\text{N}_2\text{O}_2$ : 281.1285, found 281.1287.

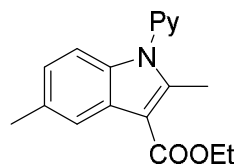

Ethyl 2,5-dimethyl-1-(pyridin-2-yl)-1H-indole-3-carboxylate (**3ba**) 78% yield

$^1\text{H}$  NMR (400 MHz,  $\text{CDCl}_3$ )  $\delta$  (ppm) 8.70 (d,  $J = 3.8$  Hz, 1H), 7.98 (s, 1H), 7.92 (td,  $J = 7.7, 1.6$  Hz, 1H), 7.44 – 7.36 (m, 2H), 7.10 (d,  $J = 8.3$  Hz, 1H), 7.00 (d,  $J = 8.3$  Hz, 1H), 4.44 (q,  $J = 7.1$  Hz, 2H), 2.69 (s, 3H), 2.48 (s, 2H), 1.47 (t,  $J = 7.1$  Hz, 3H).  $^{13}\text{C}$  NMR (101 MHz,  $\text{CDCl}_3$ )  $\delta$  (ppm) 166.2, 150.4, 150.0, 144.9, 138.6, 135.0, 131.8, 127.1, 124.2, 123.2, 122.0, 121.3, 110.0, 105.9, 59.6, 21.7, 14.7, 13.. HRMS  $[\text{M} + \text{H}]^+$  calculated for  $\text{C}_{18}\text{H}_{19}\text{N}_2\text{O}_2$ : 295.1441, found 295.1443.

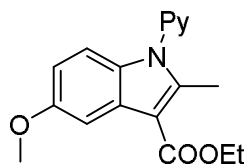

Ethyl 5-methoxy-2-methyl-1-(pyridin-2-yl)-1H-indole-3-carboxylate (**3ca**) 87% yield

$^1\text{H NMR}$  (400 MHz,  $\text{CDCl}_3$ )  $\delta$  (ppm) 8.58 (d,  $J = 4.2$  Hz, 1H), 7.80 (t,  $J = 7.6$  Hz, 1H), 7.62 (d,  $J = 2.1$  Hz, 1H), 7.36 – 7.21 (m, 2H), 7.02 (d,  $J = 8.9$  Hz, 1H), 6.71 (dd,  $J = 8.9$  Hz, 2.1 Hz, 1H), 4.33 (q,  $J = 7.1$  Hz, 2H), 4.33 (q,  $J = 7.1$  Hz, 2H), 3.79 (s, 3H), 3.79 (s, 3H), 2.59 (s, 3H), 1.37 (t,  $J = 7.1$  Hz, 3H).  $^{13}\text{C NMR}$  (101 MHz,  $\text{CDCl}_3$ )  $\delta$  166.1, 156.0, 150.2, 150.0, 145.1, 138.6, 131.6, 127.7, 123.3, 122.0, 112.3, 111.2, 106.0, 103.6, 59.6, 55.7, 14.6, 13.4. HRMS  $[\text{M} + \text{H}]^+$  calculated for  $\text{C}_{18}\text{H}_{19}\text{N}_2\text{O}_3$ : 311.1390, found 311.1391.

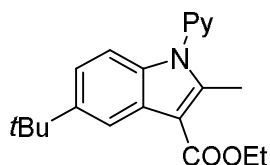

Ethyl 5-(tert-butyl)-2-methyl-1-(pyridin-2-yl)-1H-indole-3-carboxylate (**3da**) 65% yield

$^1\text{H NMR}$  (400 MHz,  $\text{CDCl}_3$ )  $\delta$  8.69 (dd,  $J = 4.7, 1.0$  Hz, 1H), 8.25 (d,  $J = 1.3$  Hz, 1H), 7.91 (td,  $J = 7.7, 1.9$  Hz, 1H), 7.42 – 7.37 (m, 2H), 7.26 (dd,  $J = 8.6$  Hz, 1.6 Hz, 1H), 7.16 (d,  $J = 8.7$  Hz, 1H), 4.44 (q,  $J = 7.1$  Hz, 2H), 2.70 (s, 3H), 1.49 (t,  $J = 7.1$  Hz, 3H), 1.40 (s, 9H).  $^{13}\text{C NMR}$  (101 MHz,  $\text{CDCl}_3$ )  $\delta$  166.2, 150.4, 150.0, 145.4, 145.0, 138.5, 134.8, 126.7, 123.2, 121.9, 120.9, 117.6, 109.9, 106.3, 59.6, 34.8, 31.9, 14.6, 13.3. HRMS  $[\text{M} + \text{H}]^+$  calculated for  $\text{C}_{21}\text{H}_{25}\text{N}_2\text{O}_2$ : 337.1911, found 337.1913.

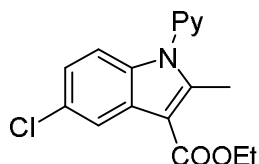

Ethyl 5-chloro-2-methyl-1-(pyridin-2-yl)-1H-indole-3-carboxylate (**3ea**) 67% yield

$^1\text{H NMR}$  (400 MHz,  $\text{CDCl}_3$ )  $\delta$  8.70 (dd,  $J = 4.8, 1.1$  Hz, 1H), 8.15 (s, 1H), 7.94 (td,  $J = 7.7, 1.8$  Hz, 1H), 7.44 (dd,  $J = 7.2, 5.1$  Hz, 1H), 7.36 (d,  $J = 7.9$  Hz, 1H), 7.11 (d,  $J = 0.9$  Hz, 2H), 4.43 (q,  $J = 7.1$  Hz, 2H), 2.69 (s, 3H), 1.47 (t,  $J = 7.1$  Hz, 3H).  $^{13}\text{C NMR}$  (101 MHz,  $\text{CDCl}_3$ )  $\delta$  165.6, 150.1, 149.8, 146.1, 138.8, 135.0, 128.1, 127.9, 123.7, 123.0, 122.0, 121.1, 111.5, 105.9, 59.9, 14.6, 13.3. HRMS  $[\text{M} + \text{H}]^+$  calculated for  $\text{C}_{17}\text{H}_{16}\text{N}_2\text{O}_2\text{Cl}$ : 315.0895, found 315.0897.

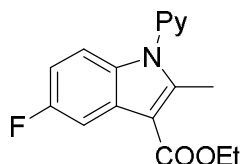

Ethyl 5-fluoro-2-methyl-1-(pyridin-2-yl)-1H-indole-3-carboxylate (**3fa**) 87% yield

$^1\text{H NMR}$  (400 MHz,  $\text{CDCl}_3$ )  $\delta$  8.74 – 8.68 (m, 1H), 7.95 (td,  $J = 7.8, 1.8$  Hz, 1H), 7.83 (dd,  $J = 9.9, 2.5$  Hz, 1H), 7.44 (dd,  $J = 7.4, 5.0$  Hz, 1H), 7.38 (d,  $J = 7.9$  Hz, 1H), 7.13 (dd,  $J = 8.9, 4.4$  Hz, 1H), 6.90 (td,  $J = 9.0, 2.5$  Hz, 1H), 4.43 (q,  $J = 7.1$  Hz, 2H), 2.70 (s, 3H), 1.47 (t,  $J = 7.1$  Hz, 3H).  $^{13}\text{C NMR}$  (101 MHz,  $\text{CDCl}_3$ )  $\delta$  165.7, 159.4 (d,  $J = 235$  Hz), 150.1, 150.0, 146.4, 138.8, 133.1, 127.6 (d,  $J = 11.0$  Hz), 123.6, 122.0, 111.2 (d,  $J = 9.6$  Hz), 110.8 (d,  $J = 25.9$  Hz), 107.0 (d,  $J = 25.3$  Hz), 106.3 (d,  $J = 4.0$  Hz),

59.8, 14.6, 13.3. HRMS  $[M + H]^+$  calculated for  $C_{17}H_{16}N_2O_2F$ : 299.1190, found 299.1190.

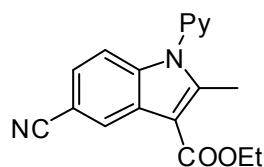

Ethyl 5-cyano-2-methyl-1-(pyridin-2-yl)-1H-indole-3-carboxylate (**3ga**) 67% yield

$^1H$  NMR (400 MHz,  $CDCl_3$ )  $\delta$  8.75 (d,  $J = 4.6$  Hz, 1H), 8.52 (s, 1H), 8.01 (t,  $J = 7.7$  Hz, 1H), 7.55 – 7.48 (m, 1H), 7.41 (d,  $J = 7.9$  Hz, 2H), 7.28 – 7.22 (m, 1H), 4.46 (q,  $J = 7.1$  Hz, 2H), 2.71 (s, 3H), 1.48 (t,  $J = 7.1$  Hz, 3H).  $^{13}C$  NMR (101 MHz,  $CDCl_3$ )  $\delta$  165.1, 150.4, 149.2, 147.3, 139.1, 138.2, 126.9, 126.6, 125.9, 124.15, 122.1, 120.4, 111.4, 106.6, 105.6, 60.2, 14.6, 13.2. HRMS  $[M + H]^+$  calculated for  $C_{18}H_{16}N_3O_2$ : 306.1237, found 306.1238.

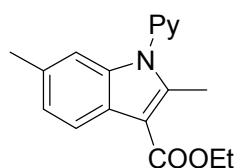

Ethyl 2,6-dimethyl-1-(pyridin-2-yl)-1H-indole-3-carboxylate (**3ha**) 85% yield

$^1H$  NMR (400 MHz,  $CDCl_3$ )  $\delta$  8.70 (d,  $J = 4.2$  Hz, 1H), 8.05 (d,  $J = 8.1$  Hz, 1H), 7.91 (t,  $J = 7.6$  Hz, 1H), 7.44 – 7.33 (m, 2H), 7.08 (d,  $J = 8.1$  Hz, 1H), 6.99 (s, 1H), 4.42 (q,  $J = 7.1$  Hz, 2H), 2.68 (s, 3H), 2.39 (s, 3H), 1.46 (t,  $J = 7.1$  Hz, 3H).  $^{13}C$  NMR (101 MHz,  $CDCl_3$ )  $\delta$  166.2, 150.3, 150.0, 144.6, 138.6, 137.0, 132.7, 124.6, 124.0, 123.3, 122.2, 121.2, 110.4, 106.1, 77.4, 77.1, 76.8, 59.6, 21.7, 14.6, 13.2. HRMS  $[M + H]^+$  calculated for  $C_{18}H_{19}N_2O_2$ : 295.1441, found 295.1444.

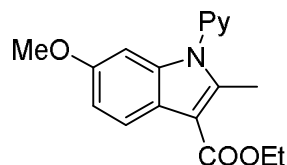

Ethyl 6-methoxy-2-methyl-1-(pyridin-2-yl)-1H-indole-3-carboxylate (**3ia**) 63% yield

$^1H$  NMR (400 MHz,  $CDCl_3$ )  $\delta$  8.72 (d,  $J = 3.7$  Hz, 1H), 8.04 (d,  $J = 8.7$  Hz, 1H), 7.98 – 7.92 (m, 1H), 7.46 – 7.37 (m, 2H), 6.91 (dd,  $J = 8.7, 2.2$  Hz, 1H), 6.71 (d,  $J = 2.1$  Hz, 1H), 4.42 (q,  $J = 7.1$  Hz, 2H), 3.77 (s, 3H), 2.67 (s, 3H), 1.46 (t,  $J = 7.1$  Hz, 3H).  $^{13}C$  NMR (101 MHz,  $CDCl_3$ )  $\delta$  166.1, 156.8, 150.3, 150.1, 144.0, 138.7, 137.4, 123.4, 122.1, 122.1, 120.9, 111.2, 106.2, 94.7, 59.6, 55.7, 14.6, 13.2. HRMS  $[M + H]^+$  calculated for  $C_{18}H_{19}N_2O_3$ : 311.1390, found 311.1392.

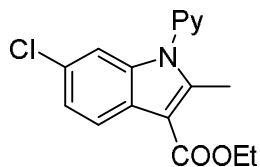

Ethyl 6-chloro-2-methyl-1-(pyridin-2-yl)-1H-indole-3-carboxylate (**2ja**) 82% yield

$^1H$  NMR (400 MHz,  $CDCl_3$ )  $\delta$  8.71 (dd,  $J = 4.8, 1.2$  Hz, 1H), 8.08 (d,  $J = 8.8$  Hz, 1H), 7.95 (td,  $J = 7.7, 1.9$  Hz, 1H), 7.44 (ddd,  $J = 7.5, 4.9, 0.8$  Hz, 1H), 7.37 (d,  $J = 7.9$  Hz, 1H), 7.24 – 7.17 (m, 2H), 4.43 (q,  $J = 7.1$  Hz, 2H), 2.68 (s, 3H), 1.46 (t,  $J = 7.1$  Hz, 3H).  $^{13}C$  NMR (101 MHz,  $CDCl_3$ )  $\delta$  165.6, 150.1, 149.6, 145.5, 138.8, 136.9, 128.6, 125.3, 123.6, 122.9, 122.4, 122.0, 110.5, 106.3, 59.8, 14.5, 13.2.

HRMS  $[M + H]^+$  calculated for  $C_{17}H_{16}N_2O_2Cl$ : 315.0895, found 315.0893.

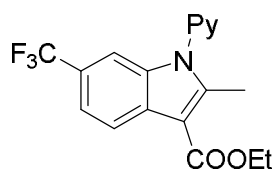

Ethyl 2-methyl-1-(pyridin-2-yl)-6-(trifluoromethyl)-1H-indole-3-carboxylate (**3ka**) 83% yield

$^1H$  NMR (400 MHz,  $CDCl_3$ )  $\delta$  8.73 (d,  $J = 3.7$  Hz, 1H), 8.28 (d,  $J = 8.4$  Hz, 1H), 7.98 (td,  $J = 7.8, 1.7$  Hz, 1H), 7.53 – 7.44 (m, 3H), 7.40 (d,  $J = 7.9$  Hz, 1H), 4.45 (q,  $J = 7.1$  Hz, 2H), 2.72 (s, 3H), 1.47 (t,  $J = 7.1$  Hz, 3H).  $^{13}C$  NMR (101 MHz,  $CDCl_3$ )  $\delta$  165.4, 150.3, 149.4, 147.4, 138.9, 135.7, 129.3, 124.9 ( $J = 270.0$ ), 124.8 ( $J = 31.9$  Hz), 123.9, 122.1, 121.9, 119.0 ( $J = 3.5$  Hz), 107.9 ( $J = 4.3$  Hz), 106.4, 59.9, 14.5, 13.2. HRMS  $[M + H]^+$  calculated for  $C_{18}H_{19}N_2O_2$ : 349.1158, found 349.1159.

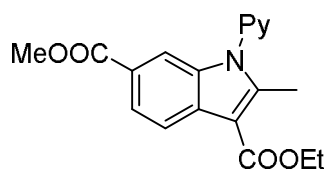

3-ethyl 6-methyl 2-methyl-1-(pyridin-2-yl)-1H-indole-3,6-dicarboxylate (**3la**) 90% yield

$^1H$  NMR (400 MHz,  $CDCl_3$ )  $\delta$  8.73 (d,  $J = 3.8$  Hz, 1H), 8.21 (d,  $J = 8.4$  Hz, 1H), 8.02 – 7.93 (m, 2H), 7.90 (s, 1H), 7.48 (dd,  $J = 7.4, 5.0$  Hz, 1H), 7.43 (d,  $J = 7.9$  Hz, 1H), 4.44 (q,  $J = 7.1$  Hz, 2H), 3.88 (s, 3H), 2.72 (s, 3H), 1.47 (t,  $J = 7.1$  Hz, 3H).  $^{13}C$  NMR (101 MHz,  $CDCl_3$ )  $\delta$  167.7, 165.6, 150.3, 149.6, 148.0, 139.0, 136.1, 130.6, 124.5, 123.9, 123.5, 122.3, 121.1, 112.5, 106.6, 59.9, 52.0, 14.6, 13.4. HRMS  $[M + H]^+$  calculated for  $C_{19}H_{19}N_2O_4$ : 339.1339, found 339.1337.

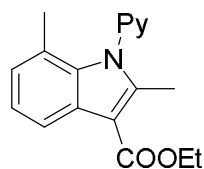

Ethyl 2,7-dimethyl-1-(pyridin-2-yl)-1H-indole-3-carboxylate (**3ma**) 93% yield

$^1H$  NMR (400 MHz,  $CDCl_3$ )  $\delta$  8.67 (d,  $J = 4.1$  Hz, 1H), 8.09 (d,  $J = 8.0$  Hz, 1H), 7.86 (t,  $J = 7.6$  Hz, 1H), 7.50 – 7.42 (m, 1H), 7.30 (d,  $J = 7.8$  Hz, 1H), 7.14 (t,  $J = 7.6$  Hz, 1H), 6.91 (d,  $J = 7.1$  Hz, 1H), 4.42 (q,  $J = 7.0$  Hz, 2H), 2.49 (s, 3H), 1.76 (s, 3H), 1.45 (t,  $J = 7.1$  Hz, 3H).  $^{13}C$  NMR (101 MHz,  $CDCl_3$ )  $\delta$  166.2, 152.1, 149.5, 145.6, 138.2, 135.6, 127.3, 125.5, 124.4, 124.3, 122.1, 121.0, 119.5, 105.5, 59.6, 19.0, 14.6, 12.7. HRMS  $[M + H]^+$  calculated for  $C_{18}H_{19}N_2O_2$ : 295.1441, found 295.1440.

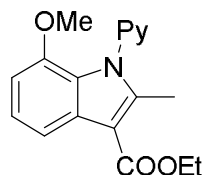

Ethyl 7-methoxy-2-methyl-1-(pyridin-2-yl)-1H-indole-3-carboxylate (**3na**) 85% yield

$^1H$  NMR (400 MHz,  $CDCl_3$ )  $\delta$  8.60 (d,  $J = 3.4$  Hz, 1H), 7.82 (t,  $J = 8.4$  Hz, 2H), 7.46 – 7.35 (m, 1H), 7.34 – 7.24 (m, 1H), 7.15 (t,  $J = 7.7$  Hz, 1H), 6.62 (d,  $J = 7.7$  Hz, 1H), 4.41 (q,  $J = 6.9$  Hz, 2H), 3.52 (s, 3H), 2.52 (s, 3H), 1.45 (t,  $J = 6.8$  Hz, 3H).  $^{13}C$  NMR (101 MHz,  $CDCl_3$ )  $\delta$  166.1, 152.1, 148.5, 146.4, 145.6, 137.4, 128.7, 126.2, 123.6, 123.4, 122.4, 114.2, 105.9, 104.4, 59.5, 55.5, 14.6, 12.6. HRMS  $[M$

+ H]<sup>+</sup> calculated for C<sub>18</sub>H<sub>19</sub>N<sub>2</sub>O<sub>3</sub>: 311.1390, found 311.1391.

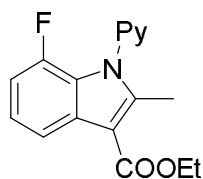

Ethyl 7-fluoro-2-methyl-1-(pyridin-2-yl)-1H-indole-3-carboxylate (**30a**) 70% yield

<sup>1</sup>H NMR (400 MHz, CDCl<sub>3</sub>) δ 8.72 (dd, *J* = 4.8, 0.9 Hz, 1H), 8.04 (d, *J* = 8.0 Hz, 1H), 7.97 (td, *J* = 7.8, 1.8 Hz, 1H), 7.53 – 7.48 (m, 1H), 7.45 (d, *J* = 7.9 Hz, 1H), 7.21 (td, *J* = 8.0, 4.6 Hz, 1H), 6.93 (dd, *J* = 12.1, 8.0 Hz, 1H), 4.50 (q, *J* = 7.1 Hz, 2H), 2.66 (s, 3H), 1.53 (t, *J* = 7.1 Hz, 3H). <sup>13</sup>C NMR (101 MHz, CDCl<sub>3</sub>) δ 165.74, 150.81, 150.34, 150.34, 149.29, 147.90, 147.90, 146.43, 138.27, 130.34, 130.30, 124.3 (*J* = 9.1 Hz), 123.97, 122.9 (*J* = 3.5 Hz), 122.3 (*J* = 3.5 Hz), 117.3 (*J* = 3.6 Hz), 108.75, 108.57, 106.64, 59.83, 14.57, 12.74. HRMS [M + H]<sup>+</sup> calculated for C<sub>17</sub>H<sub>16</sub>N<sub>2</sub>O<sub>2</sub>F: 299.1190, found 299.1192.

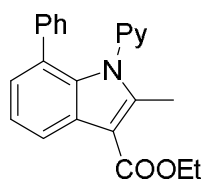

Ethyl 2-methyl-7-phenyl-1-(pyridin-2-yl)-1H-indole-3-carboxylate (**3pa**) 66% yield

<sup>1</sup>H NMR (400 MHz, CDCl<sub>3</sub>) δ 8.34 (d, *J* = 3.4 Hz, 1H), 8.28 (d, *J* = 7.9 Hz, 1H), 7.32 (t, *J* = 7.6 Hz, 1H), 7.21 (t, *J* = 7.3 Hz, 1H), 6.98 (dt, *J* = 119.1, 60.4 Hz, 7H), 6.67 (t, *J* = 10.9 Hz, 1H), 4.46 (q, *J* = 6.9 Hz, 2H), 2.58 (s, 3H), 1.48 (t, *J* = 7.0 Hz, 3H). <sup>13</sup>C NMR (101 MHz, CDCl<sub>3</sub>) δ 166.12, 150.53, 148.52, 146.60, 139.24, 137.01, 133.70, 127.94, 127.47, 126.73, 125.98, 125.57, 123.65, 122.84, 122.00, 120.79, 105.99, 77.40, 77.08, 76.77, 59.71, 14.65, 13.06. HRMS [M + H]<sup>+</sup> calculated for C<sub>23</sub>H<sub>21</sub>N<sub>2</sub>O<sub>2</sub>: 357.1598, found 357.1601.

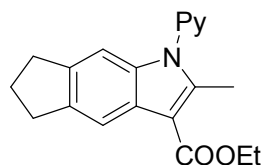

Ethyl 2-methyl-1-(pyridin-2-yl)-1,5,6,7-tetrahydrocyclopenta[f]indole-3-carboxylate (**3qa**) 76% yield

<sup>1</sup>H NMR (400 MHz, CDCl<sub>3</sub>) δ 8.78 (dd, *J* = 4.9, 1.2 Hz, 1H), 8.06 (s, 1H), 8.00 (td, *J* = 7.7, 1.9 Hz, 1H), 7.48 (M, *J* = 13.8, 8.9, 4.4 Hz, 2H), 7.11 (s, 1H), 4.51 (q, *J* = 7.1 Hz, 2H), 3.08 (t, *J* = 7.3 Hz, 2H), 2.98 (t, *J* = 7.3 Hz, 2H), 2.75 (s, 3H), 2.17 (p, *J* = 7.3 Hz, 2H), 1.54 (t, *J* = 7.1 Hz, 3H). <sup>13</sup>C NMR (101 MHz, CDCl<sub>3</sub>) δ 166.3, 150.5, 149.9, 144.2, 139.6, 139.0, 138.5, 136.2, 125.8, 123.1, 122.2, 116.4, 105.8, 59.5, 32.9, 32.6, 26.4, 14.6, 13.2. HRMS [M + H]<sup>+</sup> calculated for C<sub>20</sub>H<sub>21</sub>N<sub>2</sub>O<sub>2</sub>: 321.1598, found 321.1599.

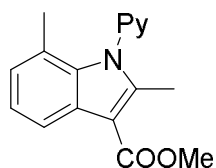

Methyl 2,7-dimethyl-1-(pyridin-2-yl)-1H-indole-3-carboxylate (**3mb**) 89% yield

$^1\text{H}$  NMR (400 MHz,  $\text{CDCl}_3$ )  $\delta$  8.68 (d,  $J = 3.9$  Hz, 1H), 8.07 (d,  $J = 8.0$  Hz, 1H), 7.93 – 7.83 (m, 1H), 7.47 (dd,  $J = 7.2, 5.1$  Hz, 1H), 7.32 (d,  $J = 7.8$  Hz, 1H), 7.14 (t,  $J = 7.6$  Hz, 1H), 6.91 (d,  $J = 7.2$  Hz, 1H), 3.95 (s, 3H), 2.49 (s, 3H), 1.77 (s, 3H).  $^{13}\text{C}$  NMR (101 MHz,  $\text{CDCl}_3$ )  $\delta$  166.5, 152.1, 149.5, 145.6, 138.2, 135.6, 127.1, 125.4, 124.4, 124.3, 122.1, 120.9, 119.4, 105.4, 50.8, 18.88, 12.7. HRMS  $[\text{M} + \text{H}]^+$  calculated for  $\text{C}_{17}\text{H}_{17}\text{N}_2\text{O}_2$ : 281.1285, found 281.1284.

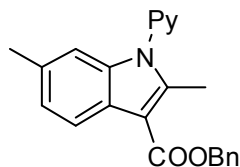

Benzyl 2,6-dimethyl-1-(pyridin-2-yl)-1H-indole-3-carboxylate (**3hc**) 92% yield

$^1\text{H}$  NMR (400 MHz,  $\text{CDCl}_3$ )  $\delta$  8.71 (dd,  $J = 4.7, 1.2$  Hz, 1H), 8.03 (d,  $J = 8.1$  Hz, 1H), 7.93 (td,  $J = 7.7, 1.8$  Hz, 1H), 7.50 (d,  $J = 7.3$  Hz, 2H), 7.43 – 7.30 (m, 5H), 7.06 (d,  $J = 8.2$  Hz, 1H), 6.99 (s, 1H), 5.44 (s, 2H), 2.68 (s, 3H), 2.38 (s, 3H).  $^{13}\text{C}$  NMR (101 MHz,  $\text{CDCl}_3$ )  $\delta$  165.9, 150.2, 150.1, 144.9, 138.6, 137.0, 137.0, 132.8, 128.6, 128.0, 127.9, 124.5, 124.1, 123.4, 122.2, 121.2, 110.4, 105.8, 65.5, 21.7, 13.3. HRMS  $[\text{M} + \text{H}]^+$  calculated for  $\text{C}_{17}\text{H}_{17}\text{N}_2\text{O}_2$ : 357.1598, found 357.1600.

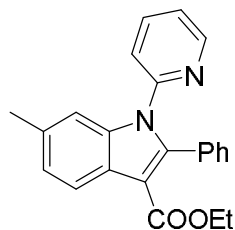

Ethyl 6-methyl-2-phenyl-1-(pyridin-2-yl)-1H-indole-3-carboxylate (**3hd**) 82% yield

$^1\text{H}$  NMR (400 MHz,  $\text{CDCl}_3$ )  $\delta$  8.59 (dd,  $J = 4.8, 1.1$  Hz, 1H), 8.17 (d,  $J = 8.2$  Hz, 1H), 7.56 (td,  $J = 7.8, 1.8$  Hz, 1H), 7.36 – 7.14 (m, 8H), 6.81 (d,  $J = 8.0$  Hz, 1H), 4.26 (q,  $J = 7.1$  Hz, 2H), 2.44 (s, 3H), 1.24 (t,  $J = 7.1$  Hz, 3H).  $^{13}\text{C}$  NMR (101 MHz,  $\text{CDCl}_3$ )  $\delta$  165.2, 150.8, 149.3, 144.7, 137.9, 137.4, 133.8, 131.4, 131.1, 128.5, 127.6, 124.8, 124.6, 122.7, 122.6, 121.7, 111.3, 107.3, 59.7, 21.8, 14.3. HRMS  $[\text{M} + \text{H}]^+$  calculated for  $\text{C}_{17}\text{H}_{17}\text{N}_2\text{O}_2$ : 357.1598, found 357.1600.

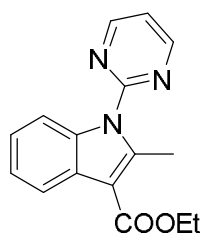

Ethyl 2-methyl-1-(pyrimidin-2-yl)-1H-indole-3-carboxylate (**3ra**) 87% yield

$^1\text{H}$  NMR (400 MHz,  $\text{CDCl}_3$ )  $\delta$  8.86 (d,  $J = 4.1$  Hz, 2H), 8.18 (d,  $J = 7.3$  Hz, 1H), 7.90 (d,  $J = 7.7$  Hz, 1H), 7.27 (m, 3H), 4.45 (q,  $J = 13.6, 6.6$  Hz, 2H), 2.95 (s, 3H), 1.48 (t,  $J = 6.8$  Hz, 3H).  $^{13}\text{C}$  NMR (101 MHz,  $\text{CDCl}_3$ )  $\delta$  166.0, 158.6, 157.3, 145.6, 136.0, 127.2, 123.3, 123.0, 121.4, 118.8, 112.5, 108.3, 59.9, 14.59, 14.3. HRMS  $[\text{M} + \text{H}]^+$  calculated for  $\text{C}_{17}\text{H}_{18}\text{N}_3\text{O}_2$ : 282.1237, found 282.1235.

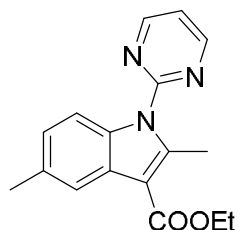

Ethyl 2,5-dimethyl-1-(pyrimidin-2-yl)-1H-indole-3-carboxylate (**3sa**) 80% yield

$^1\text{H NMR}$  (400 MHz,  $\text{CDCl}_3$ )  $\delta$  8.87 (d,  $J = 4.8$  Hz, 2H), 7.97 (s, 1H), 7.78 (d,  $J = 8.4$  Hz, 1H), 7.29 (t,  $J = 4.8$  Hz, 2H), 7.13 – 7.03 (m, 1H), 4.45 (q,  $J = 7.1$  Hz, 2H), 2.94 (s, 3H), 2.48 (s, 3H), 1.48 (t,  $J = 7.1$  Hz, 3H).  $^{13}\text{C NMR}$  (101 MHz,  $\text{CDCl}_3$ )  $\delta$  166.1, 158.5, 157.4, 145.5, 134.3, 132.4, 127.4, 124.7, 121.2, 118.6, 112.2, 108.1, 59.8, 21.7, 14.6, 14.5. HRMS  $[\text{M} + \text{H}]^+$  calculated for  $\text{C}_{17}\text{H}_{18}\text{N}_3\text{O}_2$ : 296.1394, found 296.1396.

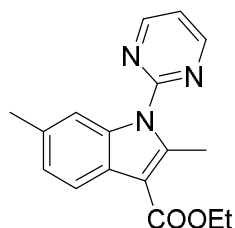

Ethyl 2,6-dimethyl-1-(pyrimidin-2-yl)-1H-indole-3-carboxylate (**3ta**) 83% yield

$^1\text{H NMR}$  (400 MHz,  $\text{CDCl}_3$ )  $\delta$  8.95 (d,  $J = 4.4$  Hz, 2H), 8.11 (d,  $J = 8.0$  Hz, 1H), 7.77 (s, 1H), 7.36 (s, 1H), 7.19 (d,  $J = 7.9$  Hz, 1H), 4.51 (q,  $J = 6.7$  Hz, 2H), 2.99 (s, 3H), 2.53 (s, 3H), 1.54 (t,  $J = 7.0$  Hz, 3H).  $^{13}\text{C NMR}$  (101 MHz,  $\text{CDCl}_3$ )  $\delta$  166.06, 158.5, 157.3, 144.9, 136.3, 133.1, 124.9, 124.5, 121.0, 118.7, 112.3, 108.2, 104.9, 59.7, 21.8, 14.5, 14.2. HRMS  $[\text{M} + \text{H}]^+$  calculated for  $\text{C}_{17}\text{H}_{18}\text{N}_3\text{O}_2$ : 296.1394, found 296.1393.

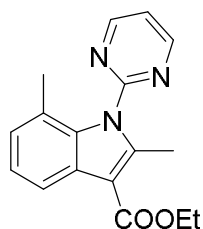

Ethyl 2,7-dimethyl-1-(pyrimidin-2-yl)-1H-indole-3-carboxylate (**3ua**) 67% yield

$^1\text{H NMR}$  (400 MHz,  $\text{CDCl}_3$ )  $\delta$  8.89 (d,  $J = 4.6$  Hz, 2H), 8.08 (d,  $J = 7.8$  Hz, 1H), 7.39 (t,  $J = 4.5$  Hz, 1H), 7.16 (t,  $J = 7.5$  Hz, 1H), 6.95 (d,  $J = 6.9$  Hz, 1H), 4.42 (q,  $J = 6.9$  Hz, 2H), 2.58 (s, 3H), 1.80 (s, 3H), 1.45 (t,  $J = 7.0$  Hz, 3H).  $^{13}\text{C NMR}$  (101 MHz,  $\text{CDCl}_3$ )  $\delta$  166.1, 158.8, 158.5, 145.5, 135.5, 127.3, 125.7, 122.4, 120.9, 120.6, 119.6, 106.3, 59.7, 19.1, 14.6, 12.7. HRMS  $[\text{M} + \text{H}]^+$  calculated for  $\text{C}_{17}\text{H}_{18}\text{N}_3\text{O}_2$ : 296.1394, found 296.1395.

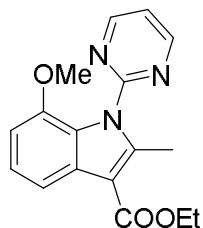



Ethyl 7-methoxy-2-methyl-1-(pyrimidin-2-yl)-1H-indole-3-carboxylate (**3va**) 73% yield.

<sup>1</sup>H NMR (400 MHz, CDCl<sub>3</sub>) δ 8.85 (d, *J* = 4.3 Hz, 2H), 7.79 (d, *J* = 7.9 Hz, 1H), 7.36 (s, 1H), 7.16 (t, *J* = 7.8 Hz, 1H), 6.65 (d, *J* = 7.7 Hz, 1H), 4.42 (q, *J* = 6.7 Hz, 2H), 3.55 (s, 3H), 2.68 (d, *J* = 64.2 Hz, 3H), 1.45 (t, *J* = 6.9 Hz, 3H). <sup>13</sup>C NMR (101 MHz, CDCl<sub>3</sub>) δ 166.1, 158.3, 146.2, 145.2, 128.7, 126.2, 122.8, 120.2, 114.3, 106.4, 104.7, 59.7, 55.8, 29.7, 14.6, 12.5. HRMS [M + H]<sup>+</sup> calculated for C<sub>17</sub>H<sub>18</sub>N<sub>3</sub>O<sub>3</sub>: 312.1343, found 312.1342.

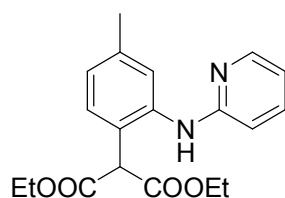

Diethyl 2-(4-methyl-2-(pyridin-2-ylamino)phenyl)malonate (**5ha**) 67% yield

<sup>1</sup>H NMR (400 MHz, CDCl<sub>3</sub>) δ 8.11 (d, *J* = 4.3 Hz, 1H), 7.39 – 7.32 (m, 1H), 7.28 (t, *J* = 7.4 Hz, 2H), 7.22 (d, *J* = 7.4 Hz, 1H), 7.11 (s, 1H), 6.69 – 6.56 (m, 1H), 6.09 (d, *J* = 8.3 Hz, 1H), 4.03 (m, 4H) 2.20 (s, 3H), 1.17 (t, *J* = 7.1 Hz, 6H). <sup>13</sup>C NMR (101 MHz, CDCl<sub>3</sub>) δ 168.8, 157.0, 148.2, 137.7, 137.5, 136.8, 132.5, 131.4, 128.5, 126.8, 113.9, 106.9, 61.8, 55.2, 18.8, 13.9. HRMS [M + H]<sup>+</sup> calculated for C<sub>18</sub>H<sub>21</sub>N<sub>2</sub>O<sub>4</sub>: 343.1652, found 343.1650.

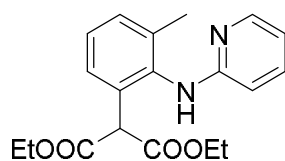

Diethyl 2-(3-methyl-2-(pyridin-2-ylamino)phenyl)malonate (**5ma**) 54% yield

<sup>1</sup>H NMR (400 MHz, CDCl<sub>3</sub>) δ 8.11 (d, *J* = 3.8 Hz, 1H), 7.40 – 7.18 (m, 4H), 7.07 (s, 1H), 6.71 – 6.54 (m, 1H), 6.09 (d, *J* = 8.1 Hz, 1H), 4.87 (s, 1H), 4.10 – 3.88 (m, 4H), 2.20 (s, 3H), 1.17 (t, *J* = 7.0 Hz, 6H). <sup>13</sup>C NMR (101 MHz, CDCl<sub>3</sub>) δ 168.8, 157.0, 148.2, 137.7, 137.5, 136.8, 132.5, 131.4, 128.5, 126.8, 113.9, 106.9, 61.8, 55.2, 18.8, 13.9. HRMS [M + H]<sup>+</sup> calculated for C<sub>18</sub>H<sub>21</sub>N<sub>2</sub>O<sub>4</sub>: 343.1652, found 343.1653.

#### Representative Synthetic Procedure of 6.

Ethyl 2,6-dimethyl-1-(pyridin-2-yl)-1H-indole-3-carboxylate (**3ha**, 88.2 mg, 0.3 mmol) was placed into a 20 mL two-necked reaction flask filled with nitrogen. The flask was cooled to 0 °C with an ice-water bath. CH<sub>2</sub>Cl<sub>2</sub> (3 mL) and methy trifluoromethanesulfonate (36 μL, 0.32 mmol) were then added to the flask. The mixture was allowed to warm to room temperature and stirred for 20 h. All volatiles were evaporated under vacuum, and sodium *tert*-butoxide (87 mg, 0.9 mmol) was added, which was again filled with nitrogen by using the standard Schlenk technique. EtOH (0.6 mL) and Et<sub>2</sub>O (2.4 mL) were added, and the resulting suspension was stirred for 4 h at room temperature. The mixture was quenched with water and extracted with Et<sub>2</sub>O. The combined organic layer was dried over sodium sulfate. After concentration, column chromatographic purification afforded ethyl 2,6-dimethyl-1H-indole-3-carboxylate (**6**, 41 mg, 0.090 mmol) in 63% yield.

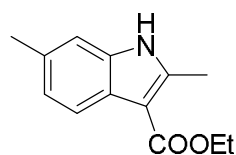

Ethyl 2,6-dimethyl-1H-indole-3-carboxylate (**6**)

$^1\text{H}$  NMR (400 MHz,  $\text{CDCl}_3$ )  $\delta$  8.28 (s, 1H), 7.96 (d,  $J = 8.1$  Hz, 1H), 7.11 – 6.94 (m, 2H), 4.39 (q,  $J = 7.1$  Hz, 2H), 2.71 (s, 3H), 2.44 (s, 3H), 1.44 (t,  $J = 7.1$  Hz, 3H).  $^{13}\text{C}$  NMR (101 MHz,  $\text{CDCl}_3$ )  $\delta$  166.2, 143.3, 134.9, 132.2, 125.0, 123.3, 121.0, 110.5, 104.5, 59.5, 21.6, 14.6, 14.2. HRMS  $[\text{M} + \text{H}]^+$  calculated for  $\text{C}_{13}\text{H}_{16}\text{NO}_2$ : 218.1176, found 218.1174.

**Synthetic Procedure of Complex 7.** A mixture of *N*-(4-(tert-butyl)-phenyl)pyridin-2-amine (0.2 mmol, 1 equiv),  $[\text{IrCp}^*\text{Cl}_2]_2$  (0.5 eq), and NaOAc (1.1equiv) in 4 mL DCM was stirred under  $\text{N}_2$  at RT overnight. After filtration, the solvent was removed. The residue was washed with  $\text{Et}_2\text{O}$  (10 mL \*2), then the solvent was removed to afford **7** in analytically pure form.

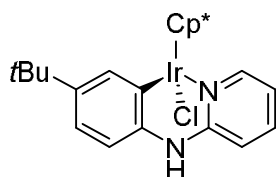

$^1\text{H}$  NMR (400 MHz,  $\text{CDCl}_3$ )  $\delta$  (ppm) = 8.51 (d,  $J = 6.0$  Hz, 1H), 7.58 (d,  $J = 2.2$  Hz, 1H), 7.42 – 7.35 (m, 1H), 6.76 (dd,  $J = 8.0$  Hz, 2.2, 1H), 6.60 – 6.47 (m, 3H), 6.31 (s, 1H), 1.46 (s, 15H), 1.32 (s, 9H).  $^{13}\text{C}$  NMR (101 MHz,  $\text{CDCl}_3$ )  $\delta$  (ppm) = 154.8, 154.1, 145.9, 138.0, 137.1, 136.4, 131.3, 119.8, 116.0, 112.0, 111.3, 87.5, 31.67, 8.7. HRMS  $[\text{M} - \text{Cl}]^+$  calculated for  $\text{C}_{25}\text{H}_{32}\text{N}_2\text{Ir}$ : 553.2195, found 553.2199.

### 3. KIE STUDIES

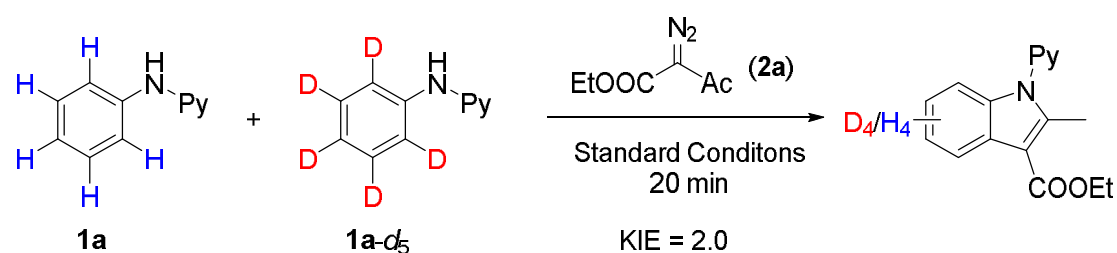

A mixture of *N*-phenylpyridin-2-amine (**1a**, 51.3 mg, 0.3 mmol, 1 equiv), *N*-(2, 3, 4, 5, 6-pentadeuteriophenyl) pyridin-2-amine (**1a-d<sub>5</sub>**, 52.5 mg, 0.6 mmol, 1 equiv),  $[\text{IrCp}^*\text{Cl}_2]_2$  (6 mg, 0.0075 mmol, 2.5 mol%) and CsOAc (14 mg, 0.075 mmol, 25 mol%) were weighed into a pressure tube equipped with a stir bar. Water (2 mL), EtOH (1 mL), HOAc (9 mg, 0.15 mmol, 50 mol%) and ethyl diazoacetate (70 mg, 0.45 mmol, 1.5 equiv) were added successively. The mixture was stirred at 100 °C for 20 min. Afterwards, it was cooled in an ice bath and the mixture was filtered off immediately. The solid residue was washed with water thoroughly, and purified by passing through a short pad of silica gel with PE /EA as eluent. The ratio of **3aa**/**3aa-d<sub>4</sub>** was indicated to be 2.0:1 by  $^1\text{H}$  NMR analysis (see below), and the KIE value was determined to be 2.0.

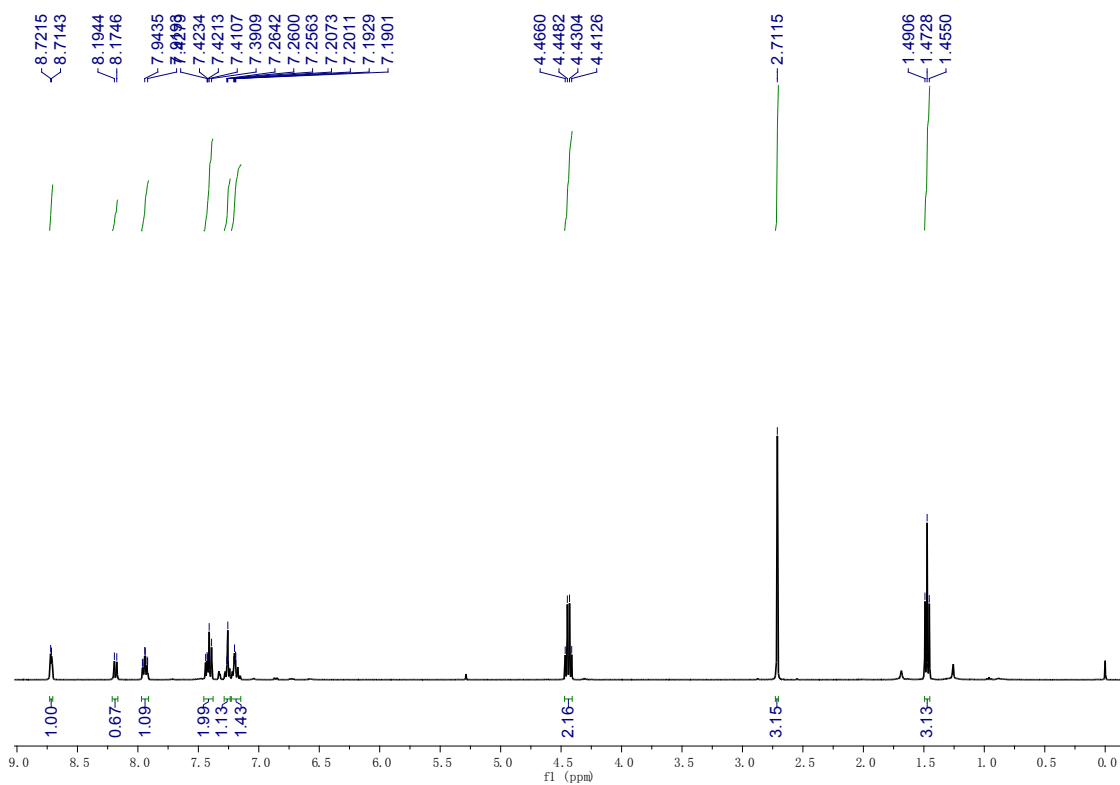

#### 4. Crystal data and Structure Refinement for Complex 7

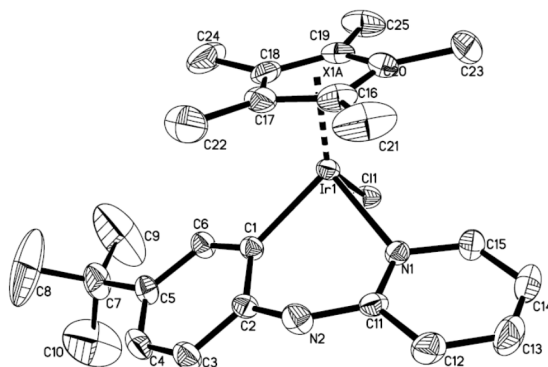

**Table 1. Crystal data and structure refinement for complex 7.**

|                             |                                                                                                                             |
|-----------------------------|-----------------------------------------------------------------------------------------------------------------------------|
| Empirical formula           | $C_{25}H_{32}ClIrN_2$                                                                                                       |
| Formula weight              | 588.18                                                                                                                      |
| Temperature                 | 293(2) K                                                                                                                    |
| Wavelength                  | 0.71073 Å                                                                                                                   |
| Crystal system, space group | Monoclinic, $P2(1)/n$                                                                                                       |
| Unit cell dimensions        | $a = 13.083(3)$ Å $\alpha = 90^\circ$<br>$b = 9.848(2)$ Å $\beta = 93.26(3)^\circ$<br>$c = 18.876(4)$ Å $\gamma = 90^\circ$ |
| Volume                      | $2428.2(8)$ Å <sup>3</sup>                                                                                                  |
| Z, Calculated density       | 4, $1.609$ Mg/m <sup>3</sup>                                                                                                |

|                                   |                                             |
|-----------------------------------|---------------------------------------------|
| Absorption coefficient            | 5.621 mm <sup>-1</sup>                      |
| F(000)                            | 1160                                        |
| Crystal size                      | 0.30 x 0.20 x 0.10 mm                       |
| Theta range for data collection   | 3.32 to 27.59 °                             |
| Limiting indices                  | -17<=h<=17, -12<=k<=12, -24<=l<=24          |
| Reflections collected / unique    | 48591 / 5599 [R(int) = 0.0422]              |
| Completeness to theta             | 99.5 %                                      |
| Refinement method                 | Full-matrix least-squares on F <sup>2</sup> |
| Data / restraints / parameters    | 5599 / 0 / 262                              |
| Goodness-of-fit on F <sup>2</sup> | 1.016                                       |
| Final R indices [I>2sigma(I)]     | R1 = 0.0232, wR <sup>2</sup> = 0.0533       |
| R indices (all data)              | R1 = 0.0331, wR <sup>2</sup> = 0.0575       |
| Largest diff. peak and hole       | 0.896 and -0.583 e.A <sup>-3</sup>          |

**Table S2.** Atomic coordinates ( $\times 10^4$ ) and equivalent isotropic displacement parameters ( $\text{Å}^2 \times 10^3$ ). U(eq) is defined as one third of the trace of the orthogonalized Uij tensor.

|       | x        | y        | z       | U(eq)  |
|-------|----------|----------|---------|--------|
| Ir(1) | 8177(1)  | 7670(1)  | 3975(1) | 31(1)  |
| Cl(1) | 8034(1)  | 10091(1) | 4135(1) | 44(1)  |
| N(1)  | 8811(2)  | 8005(3)  | 2990(1) | 36(1)  |
| N(2)  | 7564(2)  | 6703(3)  | 2373(1) | 47(1)  |
| C(1)  | 6790(3)  | 7681(3)  | 3413(2) | 35(1)  |
| C(2)  | 6703(2)  | 7136(3)  | 2733(2) | 36(1)  |
| C(3)  | 5752(3)  | 6976(4)  | 2379(2) | 48(1)  |
| C(4)  | 4881(3)  | 7340(4)  | 2706(2) | 54(1)  |
| C(5)  | 4919(3)  | 7915(4)  | 3373(2) | 48(1)  |
| C(6)  | 5891(3)  | 8094(4)  | 3706(2) | 42(1)  |
| C(7)  | 3941(3)  | 8294(5)  | 3726(3) | 72(1)  |
| C(8)  | 3310(7)  | 7036(11) | 3791(7) | 226(7) |
| C(9)  | 4098(5)  | 9065(11) | 4383(4) | 216(6) |
| C(10) | 3291(5)  | 9228(10) | 3245(4) | 175(4) |
| C(11) | 8496(3)  | 7284(3)  | 2414(2) | 39(1)  |
| C(12) | 9136(3)  | 7121(4)  | 1842(2) | 57(1)  |
| C(13) | 10062(4) | 7769(5)  | 1867(3) | 69(1)  |
| C(14) | 10353(3) | 8576(4)  | 2440(2) | 63(1)  |
| C(15) | 9722(3)  | 8658(4)  | 2986(2) | 49(1)  |
| C(16) | 9019(3)  | 5818(4)  | 4178(2) | 56(1)  |
| C(17) | 7987(3)  | 5681(4)  | 4386(2) | 58(1)  |
| C(18) | 7855(3)  | 6655(4)  | 4942(2) | 51(1)  |
| C(19) | 8811(3)  | 7314(3)  | 5072(2) | 47(1)  |
| C(20) | 9528(3)  | 6806(4)  | 4624(2) | 50(1)  |

|       |          |         |         |        |
|-------|----------|---------|---------|--------|
| C(21) | 9517(5)  | 4996(5) | 3628(2) | 110(2) |
| C(22) | 7196(5)  | 4671(5) | 4110(3) | 121(3) |
| C(23) | 10643(4) | 7190(6) | 4616(3) | 92(2)  |
| C(24) | 6941(4)  | 6803(7) | 5382(3) | 104(2) |
| C(25) | 9024(4)  | 8404(5) | 5626(2) | 81(2)  |

---

**Table S3.** Bond lengths [Å] and angles [deg] for complex 7.

---

|              |            |
|--------------|------------|
| Ir(1)-C(1)   | 2.049(3)   |
| Ir(1)-N(1)   | 2.106(3)   |
| Ir(1)-C(17)  | 2.126(3)   |
| Ir(1)-C(18)  | 2.143(3)   |
| Ir(1)-C(16)  | 2.153(3)   |
| Ir(1)-C(19)  | 2.214(4)   |
| Ir(1)-C(20)  | 2.259(3)   |
| Ir(1)-Cl(1)  | 2.4114(10) |
| N(1)-C(11)   | 1.343(4)   |
| N(1)-C(15)   | 1.355(4)   |
| N(2)-C(11)   | 1.346(5)   |
| N(2)-C(2)    | 1.413(4)   |
| N(2)-H(2A)   | 0.8600     |
| C(1)-C(6)    | 1.388(5)   |
| C(1)-C(2)    | 1.391(5)   |
| C(2)-C(3)    | 1.388(5)   |
| C(3)-C(4)    | 1.373(5)   |
| C(3)-H(3A)   | 0.9300     |
| C(4)-C(5)    | 1.379(6)   |
| C(4)-H(4A)   | 0.9300     |
| C(5)-C(6)    | 1.399(5)   |
| C(5)-C(7)    | 1.523(6)   |
| C(6)-H(6A)   | 0.9300     |
| C(7)-C(9)    | 1.458(8)   |
| C(7)-C(8)    | 1.497(10)  |
| C(7)-C(10)   | 1.519(9)   |
| C(8)-H(8A)   | 0.9600     |
| C(8)-H(8B)   | 0.9600     |
| C(8)-H(8C)   | 0.9600     |
| C(9)-H(9A)   | 0.9600     |
| C(9)-H(9B)   | 0.9600     |
| C(9)-H(9C)   | 0.9600     |
| C(10)-H(10A) | 0.9600     |
| C(10)-H(10B) | 0.9600     |

|                   |            |
|-------------------|------------|
| C(10)-H(10C)      | 0.9600     |
| C(11)-C(12)       | 1.412(5)   |
| C(12)-C(13)       | 1.369(7)   |
| C(12)-H(12A)      | 0.9300     |
| C(13)-C(14)       | 1.378(6)   |
| C(13)-H(13A)      | 0.9300     |
| C(14)-C(15)       | 1.360(5)   |
| C(14)-H(14A)      | 0.9300     |
| C(15)-H(15A)      | 0.9300     |
| C(16)-C(20)       | 1.427(5)   |
| C(16)-C(17)       | 1.434(6)   |
| C(16)-C(21)       | 1.496(5)   |
| C(17)-C(18)       | 1.439(6)   |
| C(17)-C(22)       | 1.507(5)   |
| C(18)-C(19)       | 1.419(6)   |
| C(18)-C(24)       | 1.501(6)   |
| C(19)-C(20)       | 1.392(6)   |
| C(19)-C(25)       | 1.513(5)   |
| C(20)-C(23)       | 1.507(6)   |
| C(21)-H(21A)      | 0.9600     |
| C(21)-H(21B)      | 0.9600     |
| C(21)-H(21C)      | 0.9600     |
| C(22)-H(22A)      | 0.9600     |
| C(22)-H(22B)      | 0.9600     |
| C(22)-H(22C)      | 0.9600     |
| C(23)-H(23A)      | 0.9600     |
| C(23)-H(23B)      | 0.9600     |
| C(23)-H(23C)      | 0.9600     |
| C(24)-H(24A)      | 0.9600     |
| C(24)-H(24B)      | 0.9600     |
| C(24)-H(24C)      | 0.9600     |
| C(25)-H(25A)      | 0.9600     |
| C(25)-H(25B)      | 0.9600     |
| C(25)-H(25C)      | 0.9600     |
|                   |            |
| C(1)-Ir(1)-N(1)   | 85.59(12)  |
| C(1)-Ir(1)-C(17)  | 94.31(13)  |
| N(1)-Ir(1)-C(17)  | 121.77(15) |
| C(1)-Ir(1)-C(18)  | 103.42(14) |
| N(1)-Ir(1)-C(18)  | 158.71(13) |
| C(17)-Ir(1)-C(18) | 39.40(15)  |
| C(1)-Ir(1)-C(16)  | 121.70(14) |
| N(1)-Ir(1)-C(16)  | 93.82(13)  |
| C(17)-Ir(1)-C(16) | 39.14(16)  |

|                   |            |
|-------------------|------------|
| C(18)-Ir(1)-C(16) | 64.98(15)  |
| C(1)-Ir(1)-C(19)  | 139.35(15) |
| N(1)-Ir(1)-C(19)  | 134.89(14) |
| C(17)-Ir(1)-C(19) | 63.81(13)  |
| C(18)-Ir(1)-C(19) | 37.96(15)  |
| C(16)-Ir(1)-C(19) | 62.56(14)  |
| C(1)-Ir(1)-C(20)  | 157.72(13) |
| N(1)-Ir(1)-C(20)  | 101.69(12) |
| C(17)-Ir(1)-C(20) | 63.87(14)  |
| C(18)-Ir(1)-C(20) | 63.17(14)  |
| C(16)-Ir(1)-C(20) | 37.63(15)  |
| C(19)-Ir(1)-C(20) | 36.24(14)  |
| C(1)-Ir(1)-Cl(1)  | 89.23(9)   |
| N(1)-Ir(1)-Cl(1)  | 89.60(8)   |
| C(17)-Ir(1)-Cl(1) | 148.60(13) |
| C(18)-Ir(1)-Cl(1) | 109.53(11) |
| C(16)-Ir(1)-Cl(1) | 149.04(12) |
| C(19)-Ir(1)-Cl(1) | 93.86(9)   |
| C(20)-Ir(1)-Cl(1) | 111.64(11) |
| C(11)-N(1)-C(15)  | 118.5(3)   |
| C(11)-N(1)-Ir(1)  | 121.0(2)   |
| C(15)-N(1)-Ir(1)  | 118.0(2)   |
| C(11)-N(2)-C(2)   | 126.0(3)   |
| C(11)-N(2)-H(2A)  | 117.0      |
| C(2)-N(2)-H(2A)   | 117.0      |
| C(6)-C(1)-C(2)    | 117.0(3)   |
| C(6)-C(1)-Ir(1)   | 122.7(2)   |
| C(2)-C(1)-Ir(1)   | 120.0(2)   |
| C(3)-C(2)-C(1)    | 120.8(3)   |
| C(3)-C(2)-N(2)    | 116.9(3)   |
| C(1)-C(2)-N(2)    | 122.3(3)   |
| C(4)-C(3)-C(2)    | 119.9(3)   |
| C(4)-C(3)-H(3A)   | 120.0      |
| C(2)-C(3)-H(3A)   | 120.0      |
| C(3)-C(4)-C(5)    | 122.0(3)   |
| C(3)-C(4)-H(4A)   | 119.0      |
| C(5)-C(4)-H(4A)   | 119.0      |
| C(4)-C(5)-C(6)    | 116.5(3)   |
| C(4)-C(5)-C(7)    | 120.9(4)   |
| C(6)-C(5)-C(7)    | 122.5(4)   |
| C(1)-C(6)-C(5)    | 123.7(3)   |
| C(1)-C(6)-H(6A)   | 118.2      |
| C(5)-C(6)-H(6A)   | 118.2      |
| C(9)-C(7)-C(8)    | 114.4(7)   |

|                     |          |
|---------------------|----------|
| C(9)-C(7)-C(10)     | 103.9(6) |
| C(8)-C(7)-C(10)     | 104.9(7) |
| C(9)-C(7)-C(5)      | 114.7(4) |
| C(8)-C(7)-C(5)      | 108.3(5) |
| C(10)-C(7)-C(5)     | 110.0(5) |
| C(7)-C(8)-H(8A)     | 109.5    |
| C(7)-C(8)-H(8B)     | 109.5    |
| H(8A)-C(8)-H(8B)    | 109.5    |
| C(7)-C(8)-H(8C)     | 109.5    |
| H(8A)-C(8)-H(8C)    | 109.5    |
| H(8B)-C(8)-H(8C)    | 109.5    |
| C(7)-C(9)-H(9A)     | 109.5    |
| C(7)-C(9)-H(9B)     | 109.5    |
| H(9A)-C(9)-H(9B)    | 109.5    |
| C(7)-C(9)-H(9C)     | 109.5    |
| H(9A)-C(9)-H(9C)    | 109.5    |
| H(9B)-C(9)-H(9C)    | 109.5    |
| C(7)-C(10)-H(10A)   | 109.5    |
| C(7)-C(10)-H(10B)   | 109.5    |
| H(10A)-C(10)-H(10B) | 109.5    |
| C(7)-C(10)-H(10C)   | 109.5    |
| H(10A)-C(10)-H(10C) | 109.5    |
| H(10B)-C(10)-H(10C) | 109.5    |
| N(1)-C(11)-N(2)     | 120.5(3) |
| N(1)-C(11)-C(12)    | 120.7(3) |
| N(2)-C(11)-C(12)    | 118.8(3) |
| C(13)-C(12)-C(11)   | 118.9(4) |
| C(13)-C(12)-H(12A)  | 120.5    |
| C(11)-C(12)-H(12A)  | 120.5    |
| C(12)-C(13)-C(14)   | 120.0(4) |
| C(12)-C(13)-H(13A)  | 120.0    |
| C(14)-C(13)-H(13A)  | 120.0    |
| C(15)-C(14)-C(13)   | 118.5(4) |
| C(15)-C(14)-H(14A)  | 120.8    |
| C(13)-C(14)-H(14A)  | 120.8    |
| N(1)-C(15)-C(14)    | 123.2(4) |
| N(1)-C(15)-H(15A)   | 118.4    |
| C(14)-C(15)-H(15A)  | 118.4    |
| C(20)-C(16)-C(17)   | 108.6(3) |
| C(20)-C(16)-C(21)   | 124.8(5) |
| C(17)-C(16)-C(21)   | 126.4(4) |
| C(20)-C(16)-Ir(1)   | 75.2(2)  |
| C(17)-C(16)-Ir(1)   | 69.4(2)  |
| C(21)-C(16)-Ir(1)   | 125.0(3) |



|                     |           |
|---------------------|-----------|
| C(16)-C(17)-C(18)   | 106.9(3)  |
| C(16)-C(17)-C(22)   | 127.3(5)  |
| C(18)-C(17)-C(22)   | 125.7(5)  |
| C(16)-C(17)-Ir(1)   | 71.5(2)   |
| C(18)-C(17)-Ir(1)   | 70.9(2)   |
| C(22)-C(17)-Ir(1)   | 125.0(3)  |
| C(19)-C(18)-C(17)   | 106.9(3)  |
| C(19)-C(18)-C(24)   | 125.6(4)  |
| C(17)-C(18)-C(24)   | 126.9(5)  |
| C(19)-C(18)-Ir(1)   | 73.7(2)   |
| C(17)-C(18)-Ir(1)   | 69.66(19) |
| C(24)-C(18)-Ir(1)   | 128.9(3)  |
| C(20)-C(19)-C(18)   | 110.4(3)  |
| C(20)-C(19)-C(25)   | 124.8(4)  |
| C(18)-C(19)-C(25)   | 124.8(4)  |
| C(20)-C(19)-Ir(1)   | 73.6(2)   |
| C(18)-C(19)-Ir(1)   | 68.3(2)   |
| C(25)-C(19)-Ir(1)   | 125.3(3)  |
| C(19)-C(20)-C(16)   | 107.2(3)  |
| C(19)-C(20)-C(23)   | 127.0(4)  |
| C(16)-C(20)-C(23)   | 125.8(4)  |
| C(19)-C(20)-Ir(1)   | 70.1(2)   |
| C(16)-C(20)-Ir(1)   | 67.15(19) |
| C(23)-C(20)-Ir(1)   | 128.9(3)  |
| C(16)-C(21)-H(21A)  | 109.5     |
| C(16)-C(21)-H(21B)  | 109.5     |
| H(21A)-C(21)-H(21B) | 109.5     |
| C(16)-C(21)-H(21C)  | 109.5     |
| H(21A)-C(21)-H(21C) | 109.5     |
| H(21B)-C(21)-H(21C) | 109.5     |
| C(17)-C(22)-H(22A)  | 109.5     |
| C(17)-C(22)-H(22B)  | 109.5     |
| H(22A)-C(22)-H(22B) | 109.5     |
| C(17)-C(22)-H(22C)  | 109.5     |
| H(22A)-C(22)-H(22C) | 109.5     |
| H(22B)-C(22)-H(22C) | 109.5     |
| C(20)-C(23)-H(23A)  | 109.5     |
| C(20)-C(23)-H(23B)  | 109.5     |
| H(23A)-C(23)-H(23B) | 109.5     |
| C(20)-C(23)-H(23C)  | 109.5     |
| H(23A)-C(23)-H(23C) | 109.5     |
| H(23B)-C(23)-H(23C) | 109.5     |
| C(18)-C(24)-H(24A)  | 109.5     |
| C(18)-C(24)-H(24B)  | 109.5     |

|                            |              |
|----------------------------|--------------|
| H(24A)-C(24)-H(24B)        | 109.5        |
| C(18)-C(24)-H(24C)         | 109.5        |
| H(24A)-C(24)-H(24C)        | 109.5        |
| H(24B)-C(24)-H(24C)        | 109.5        |
| C(19)-C(25)-H(25A)         | 109.5        |
| C(19)-C(25)-H(25B)         | 109.5        |
| H(25A)-C(25)-H(25B)        | 109.5        |
| C(19)-C(25)-H(25C)         | 109.5        |
| H(25A)-C(25)-H(25C)        | 109.5        |
| <u>H(25B)-C(25)-H(25C)</u> | <u>109.5</u> |

## REFERENCES

- [1] X. Huang, S. Xu, Q. Tan, M. Gao, M. Li, B. Xu, *Chem. Commun.* **2014**, 50, 1465-1468.
- [2] K.-S. Masters, T. R. M. Rauws, A. K. Yadav, W. A. Herrebout, B. Van der Veken, B. U. W. Maes, *Chem. Eur. J.* **2011**, 17, 6315-6320.
- [3] L. Ackermann, A. V. Lygin, *Org. Lett.* **2012**, 14, 764-767.
- [4] N. D. Koduri, H. Scott, B. Hileman, J. D. Cox, M. Coffin, L. Glicksberg and S. R. Hussaini, *Org. Lett.*, 2012, **14**, 440.

# NMR Spectra

3aa

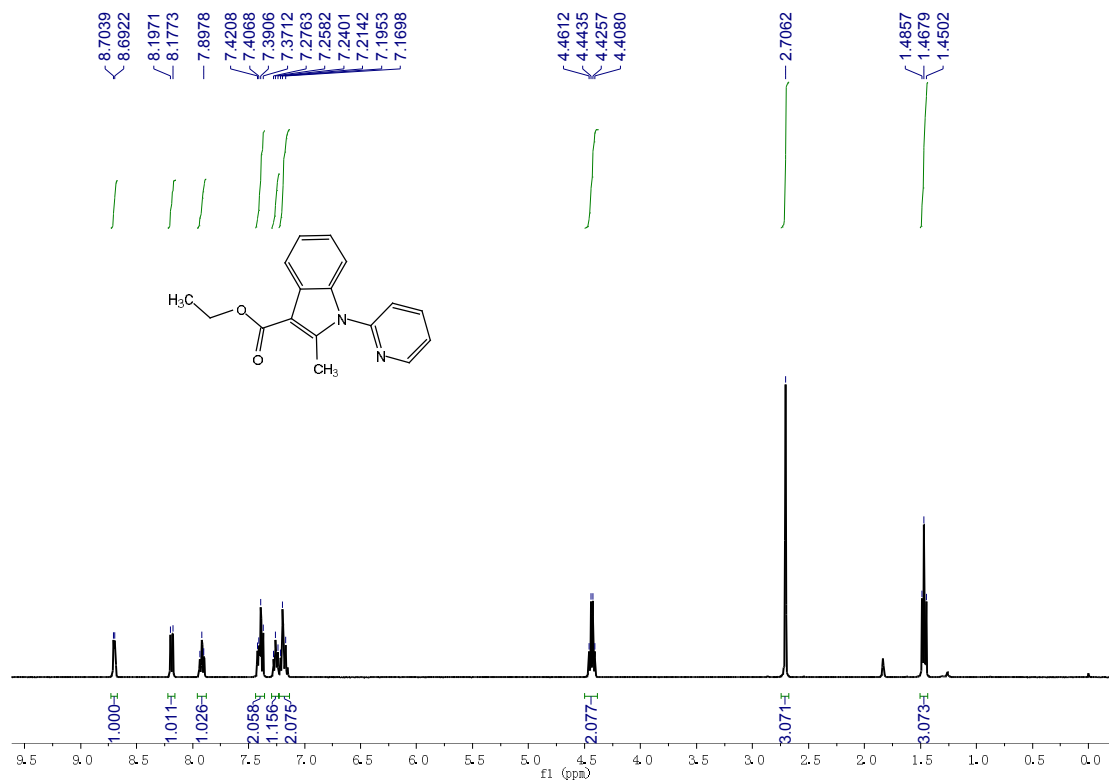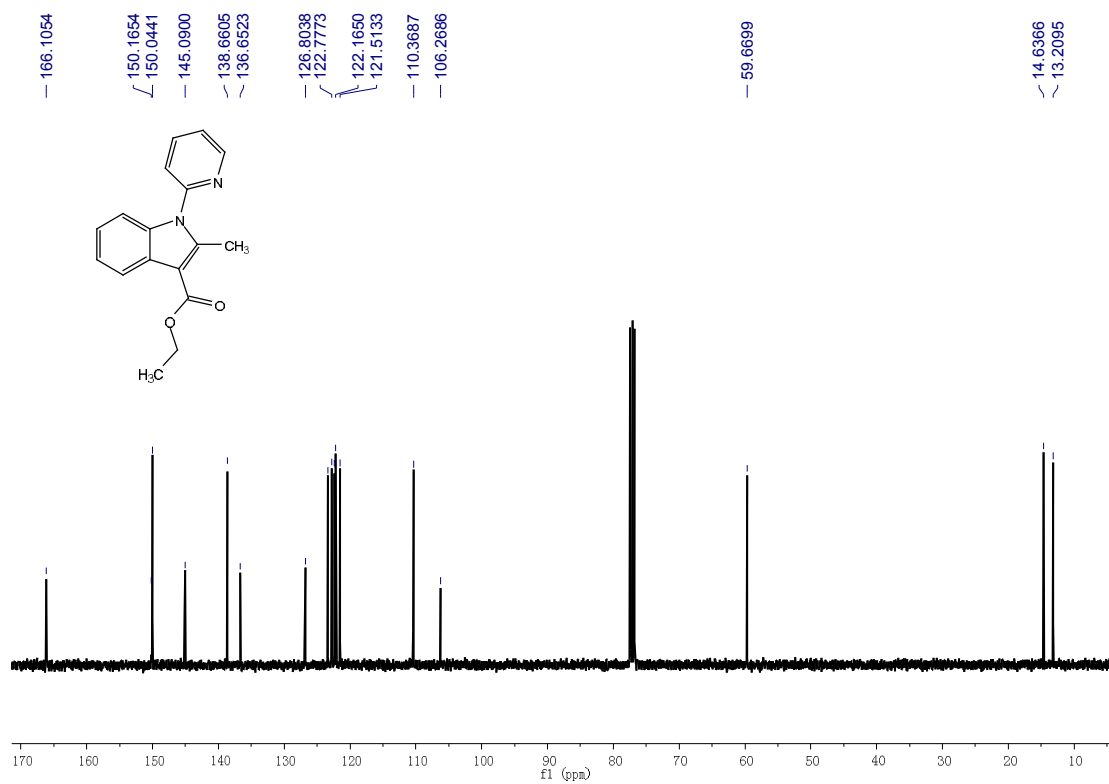

**3ba**

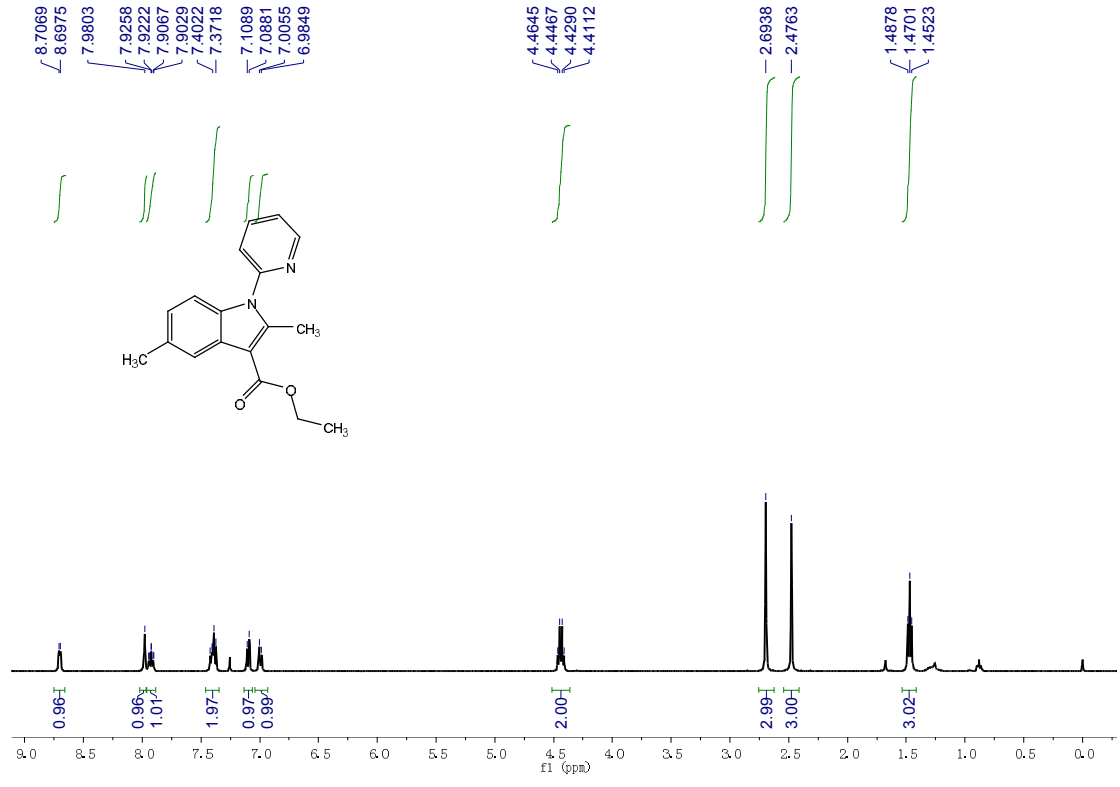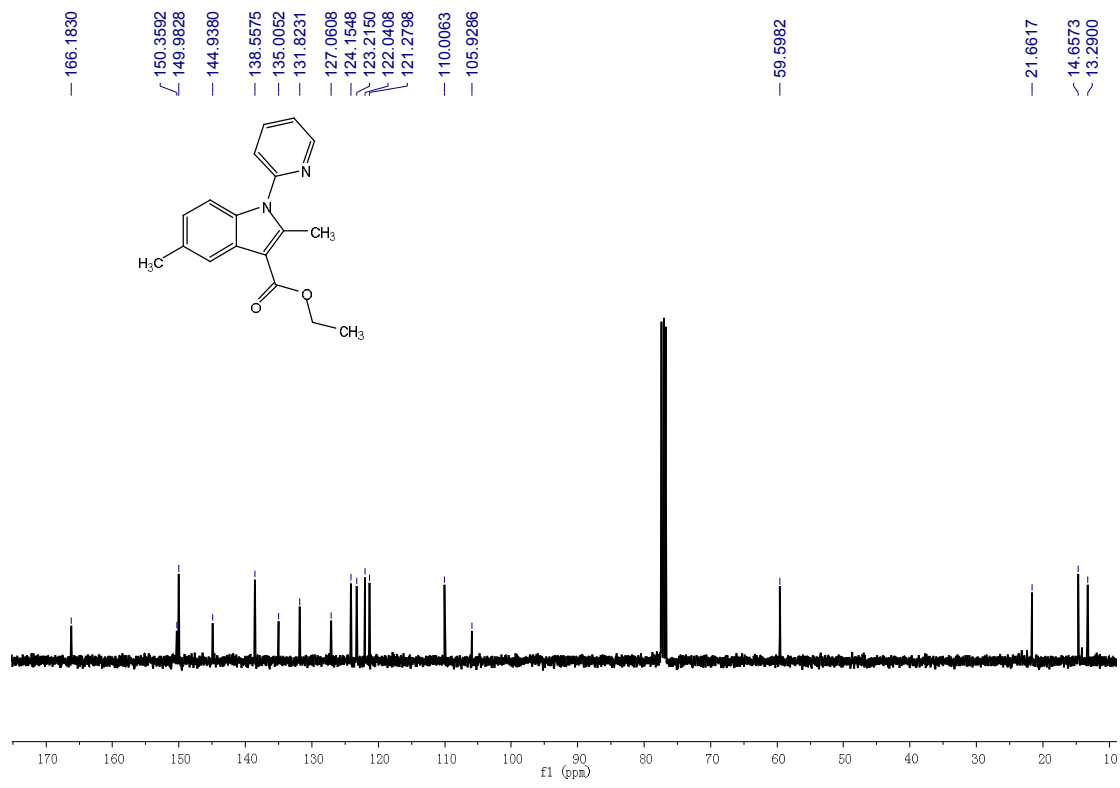

**3ca**

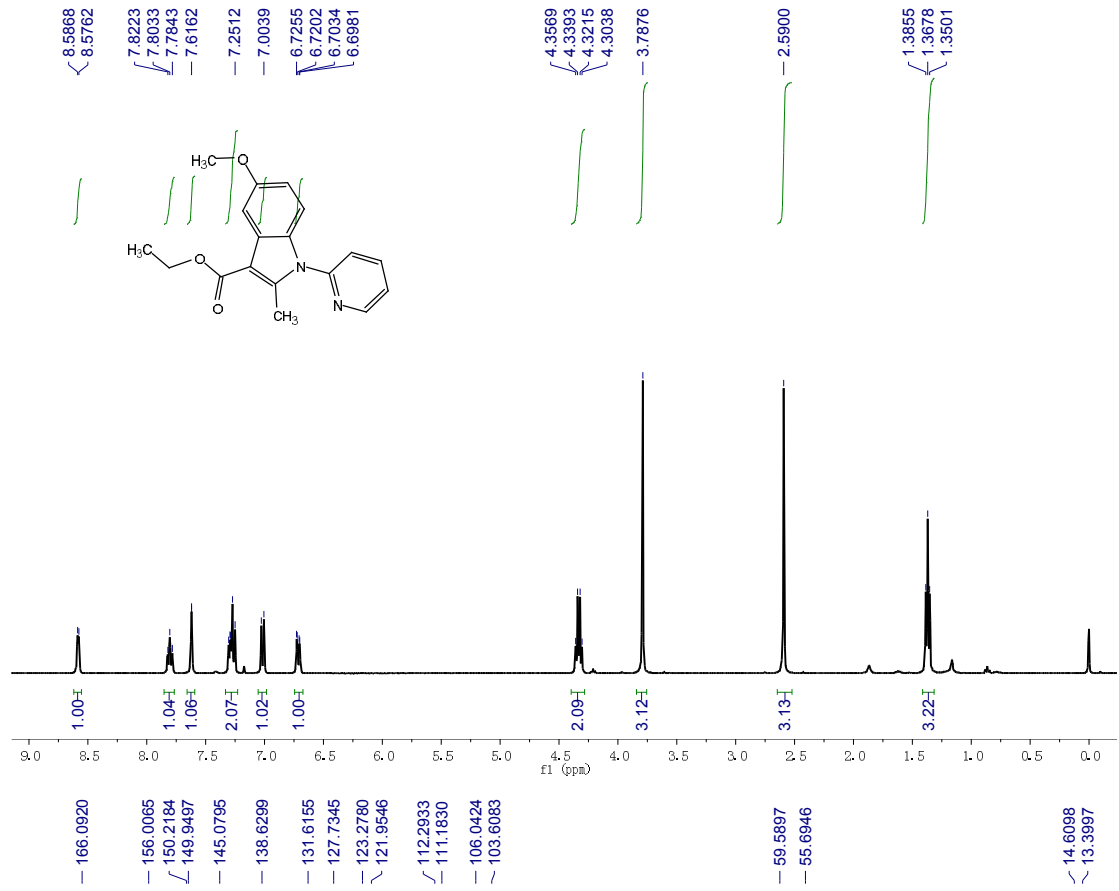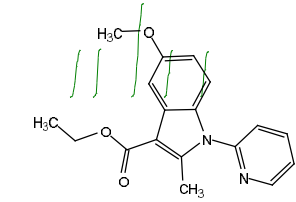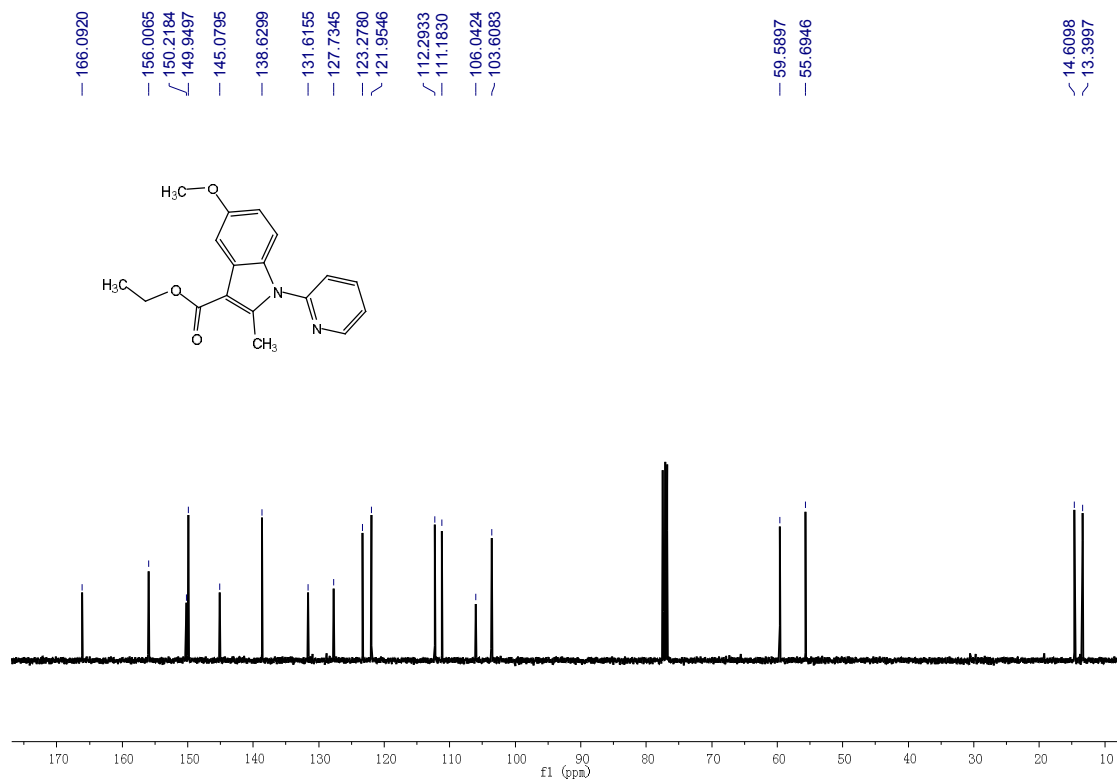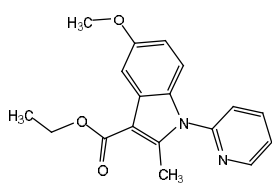

3da

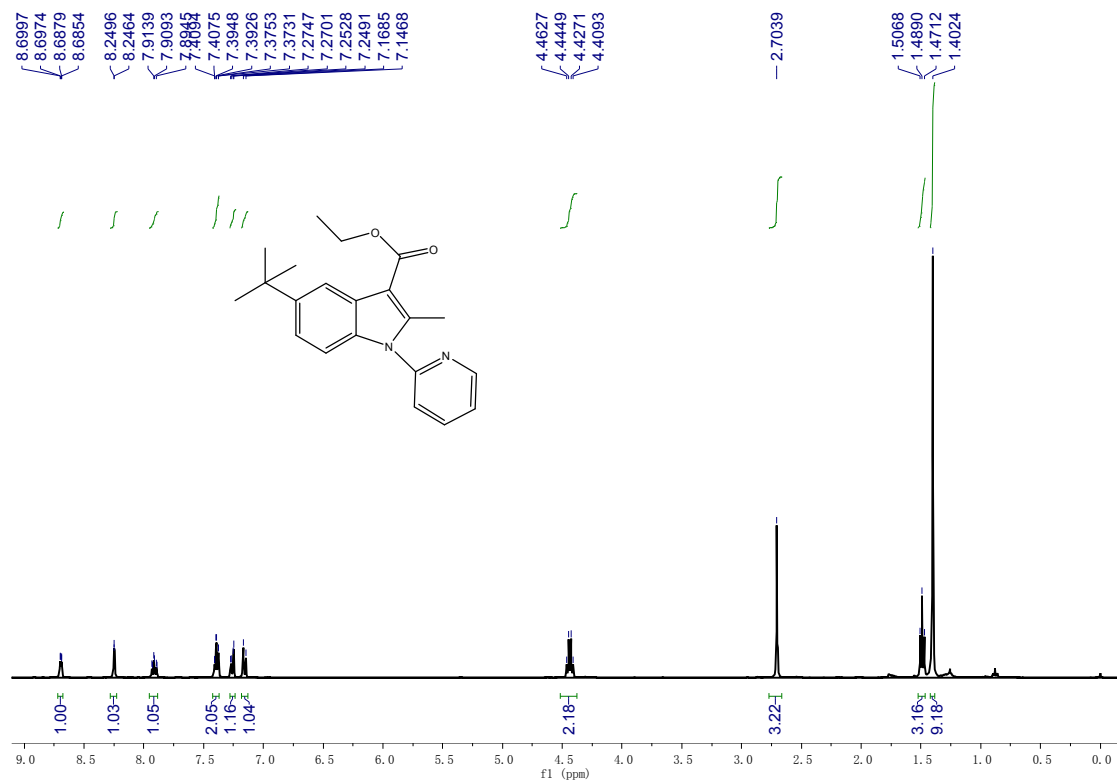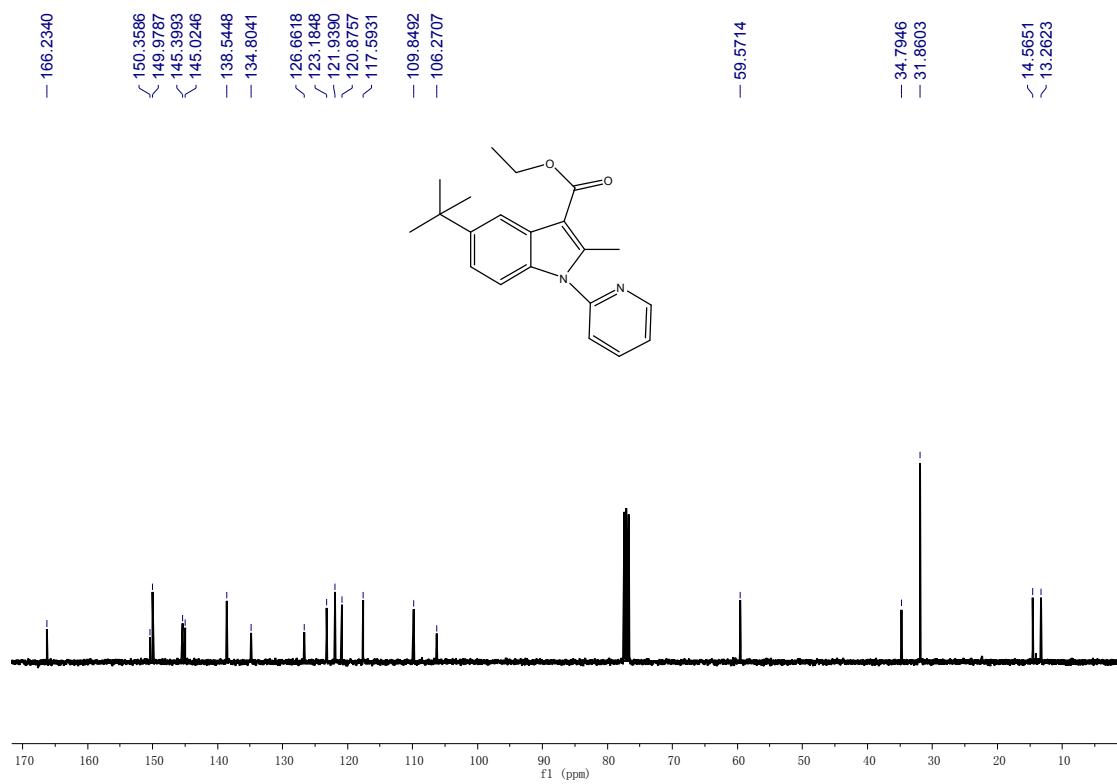

3ea

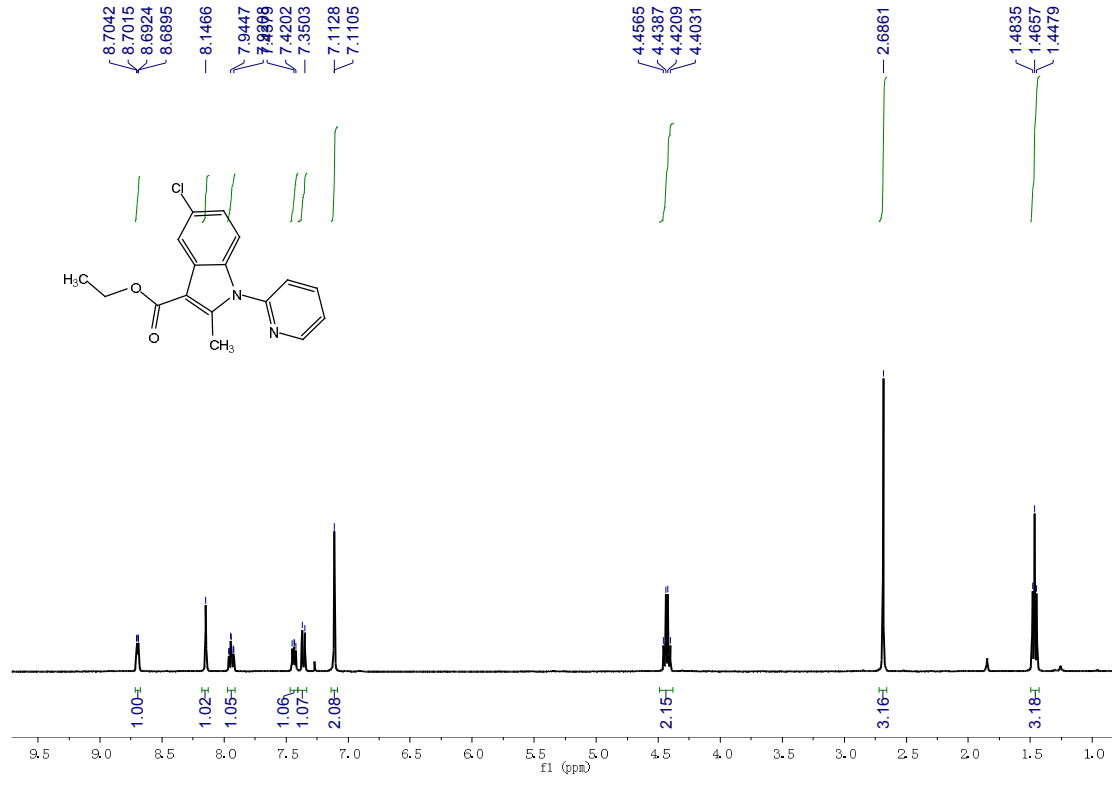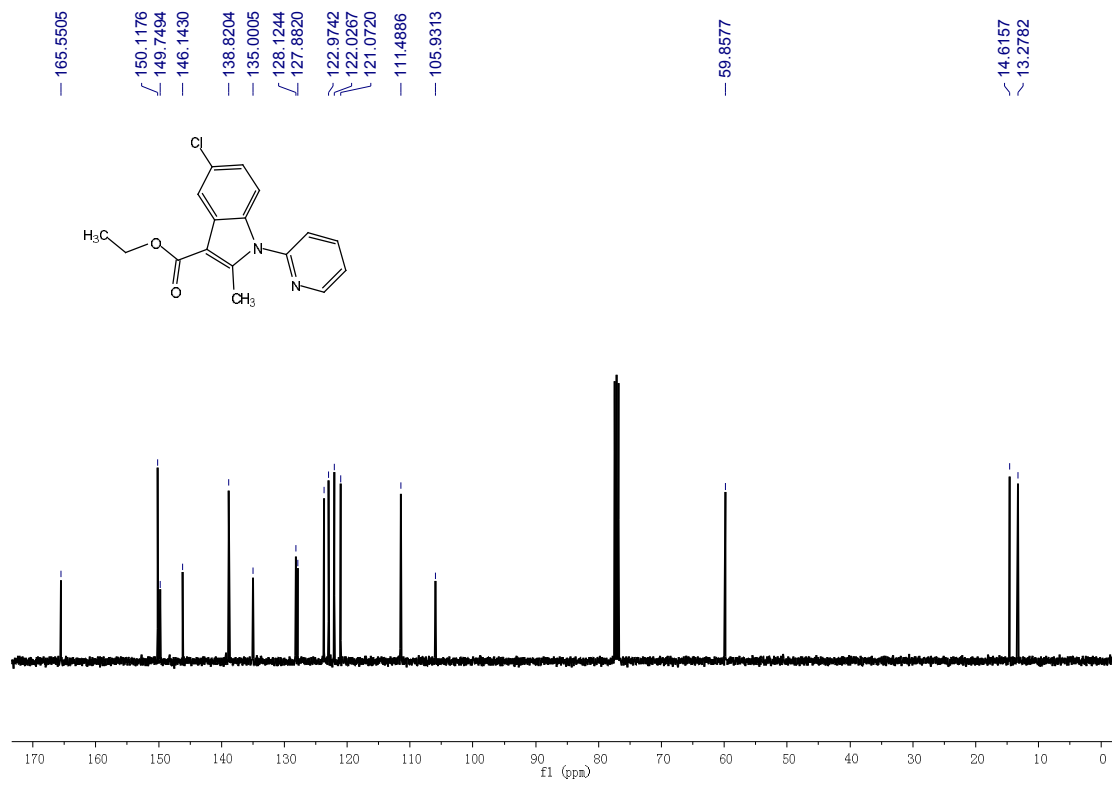

3fa

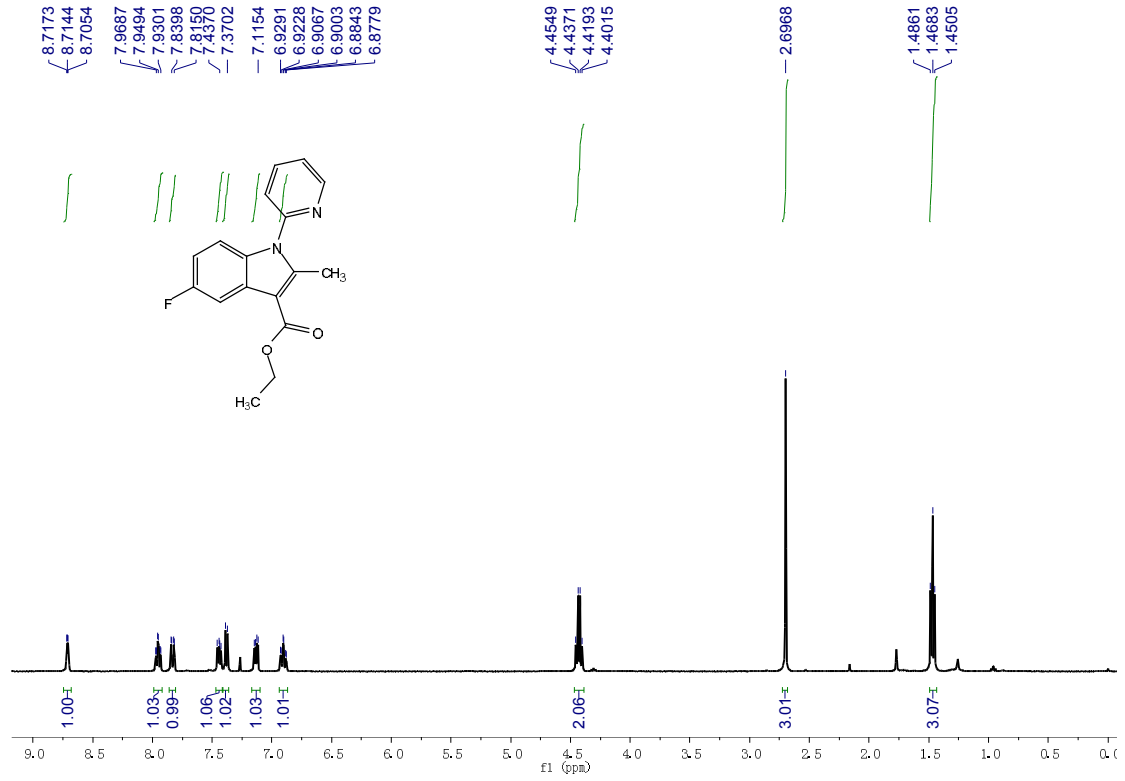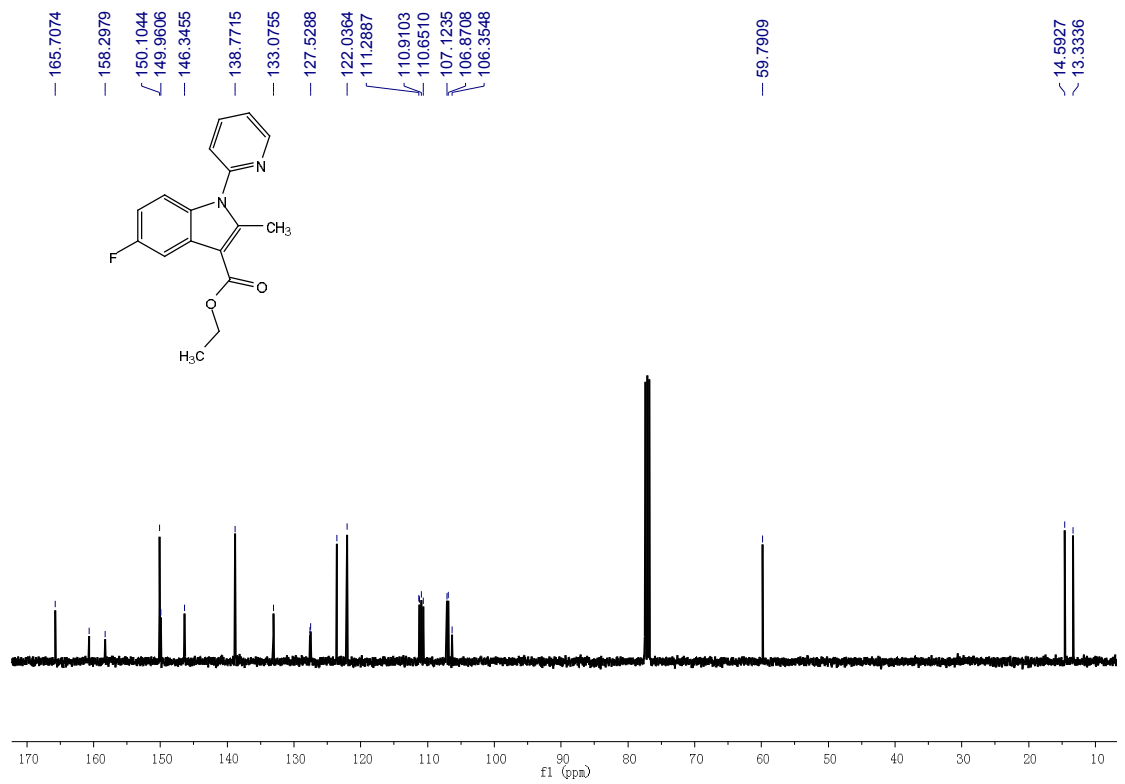



**3ga**

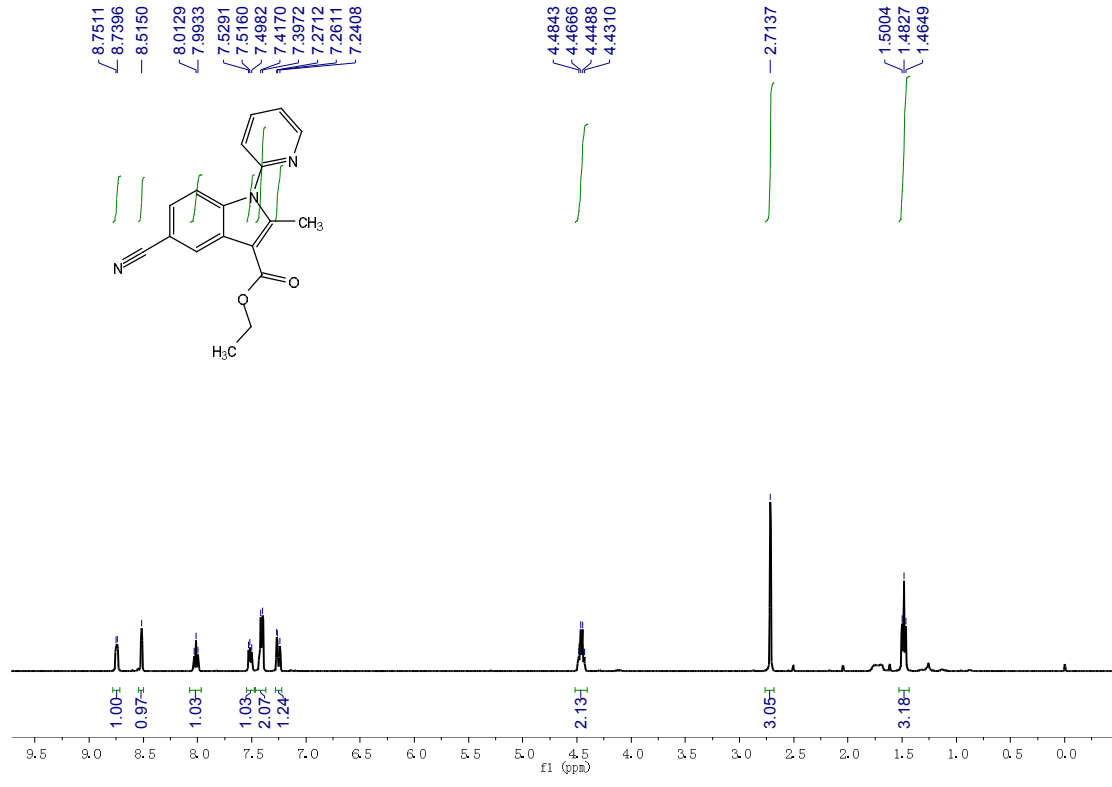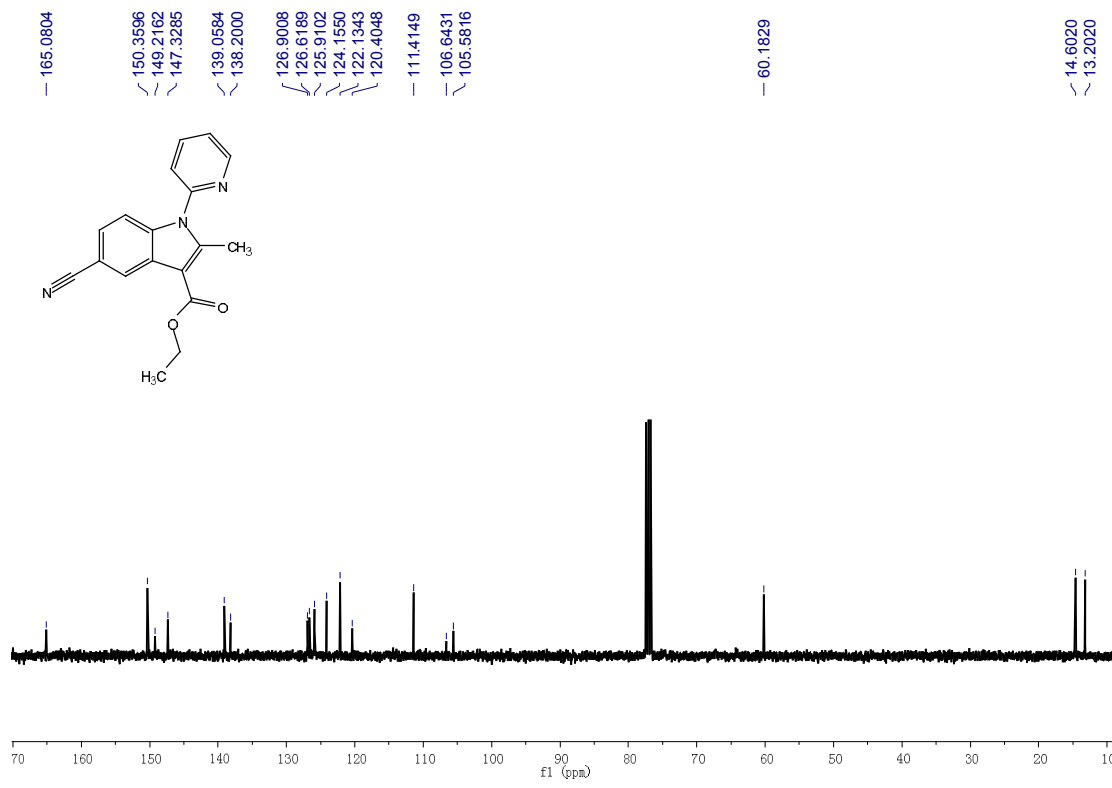

3ha

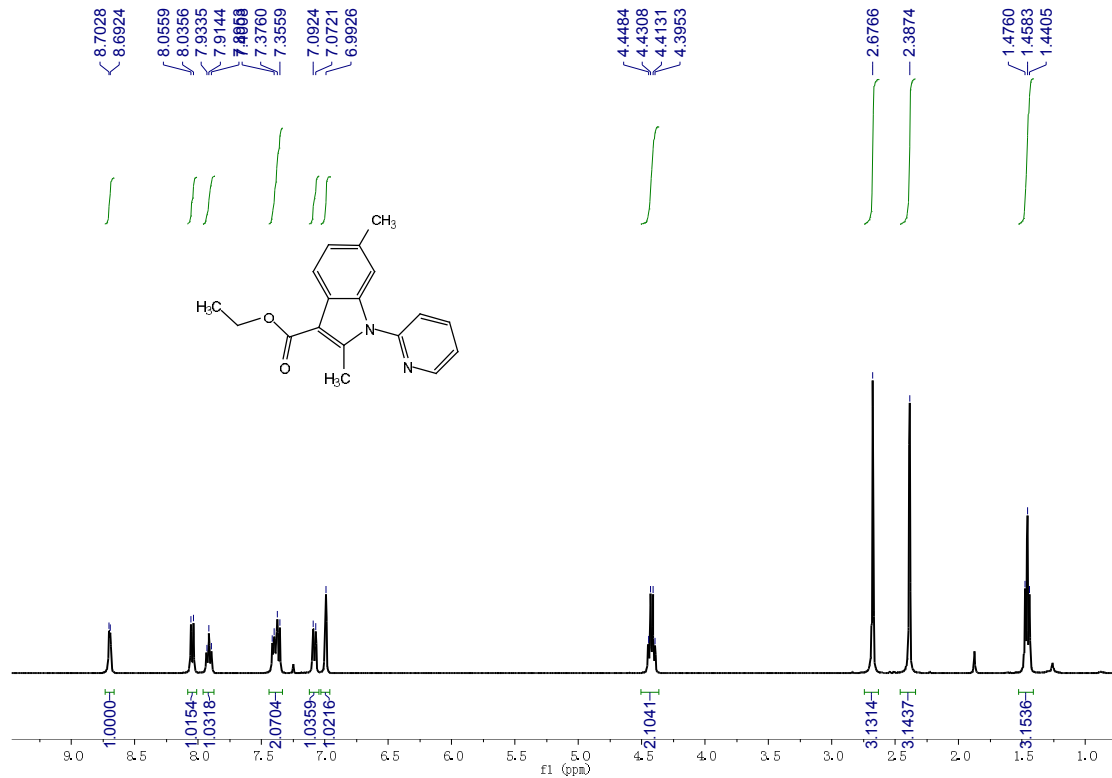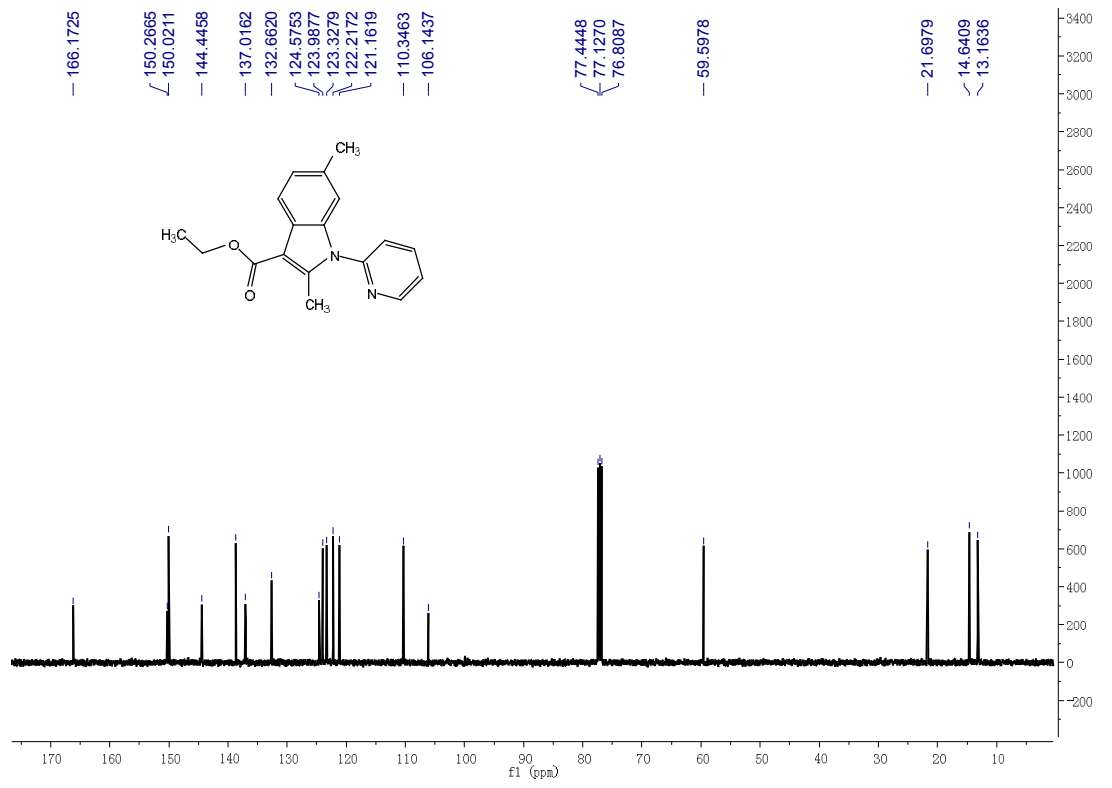

3ia

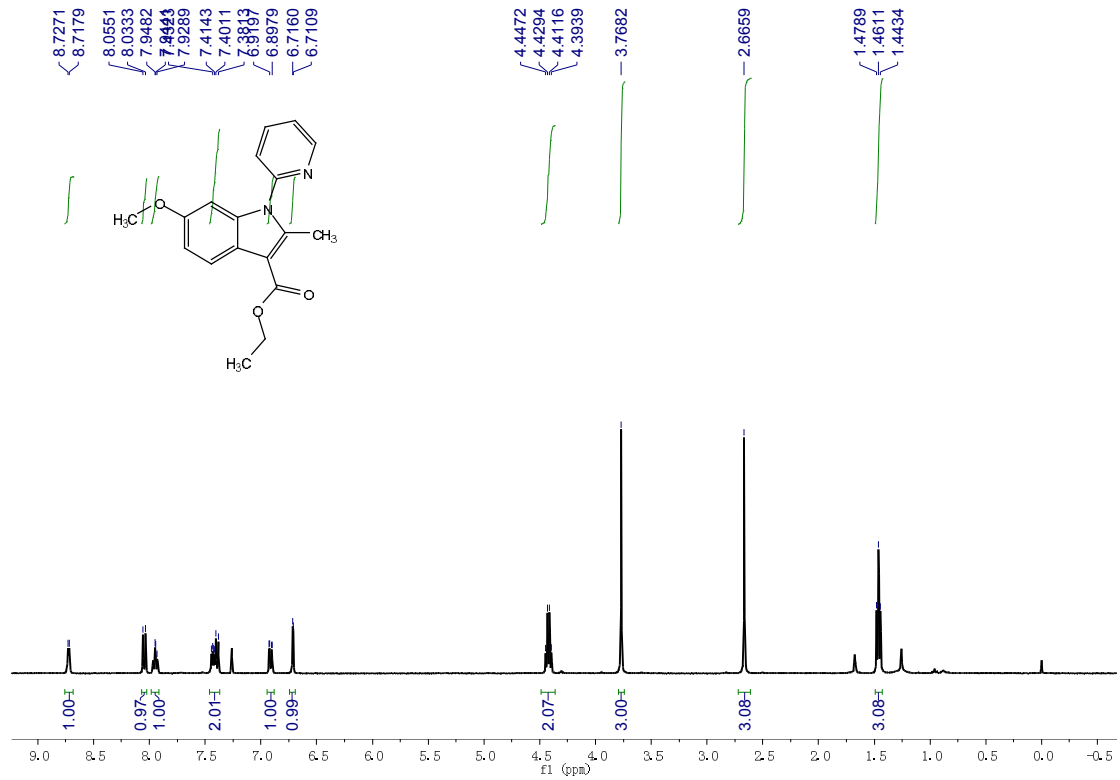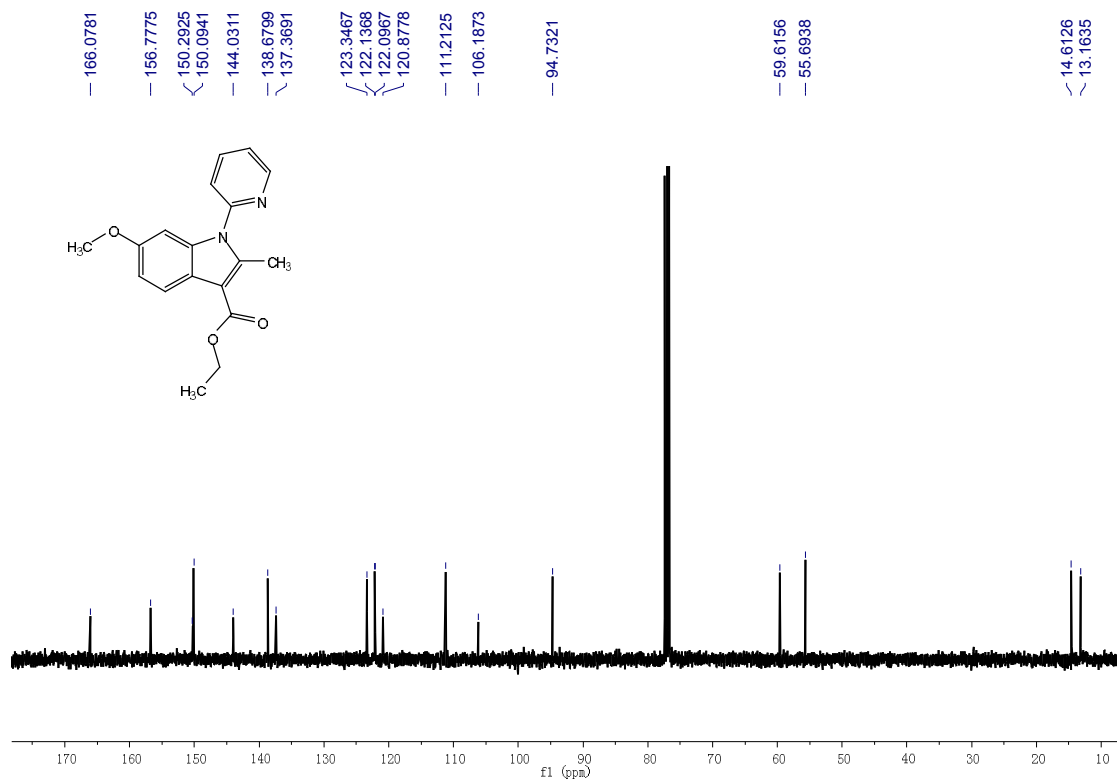

3ja

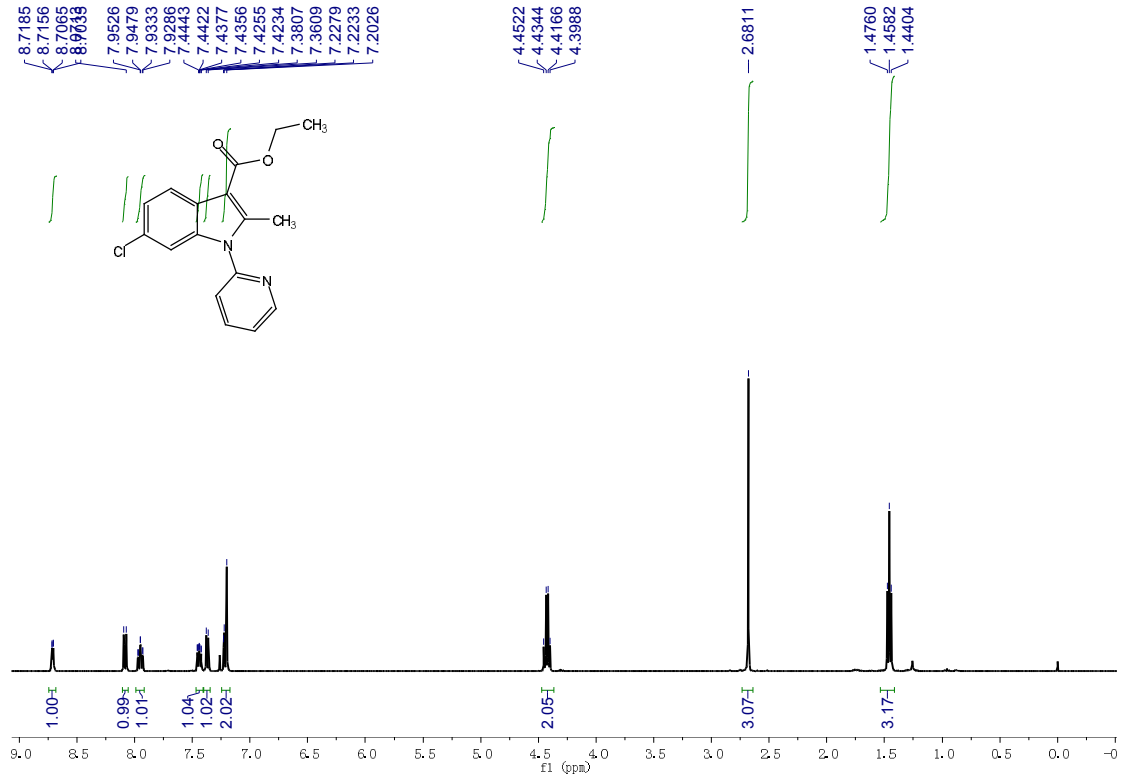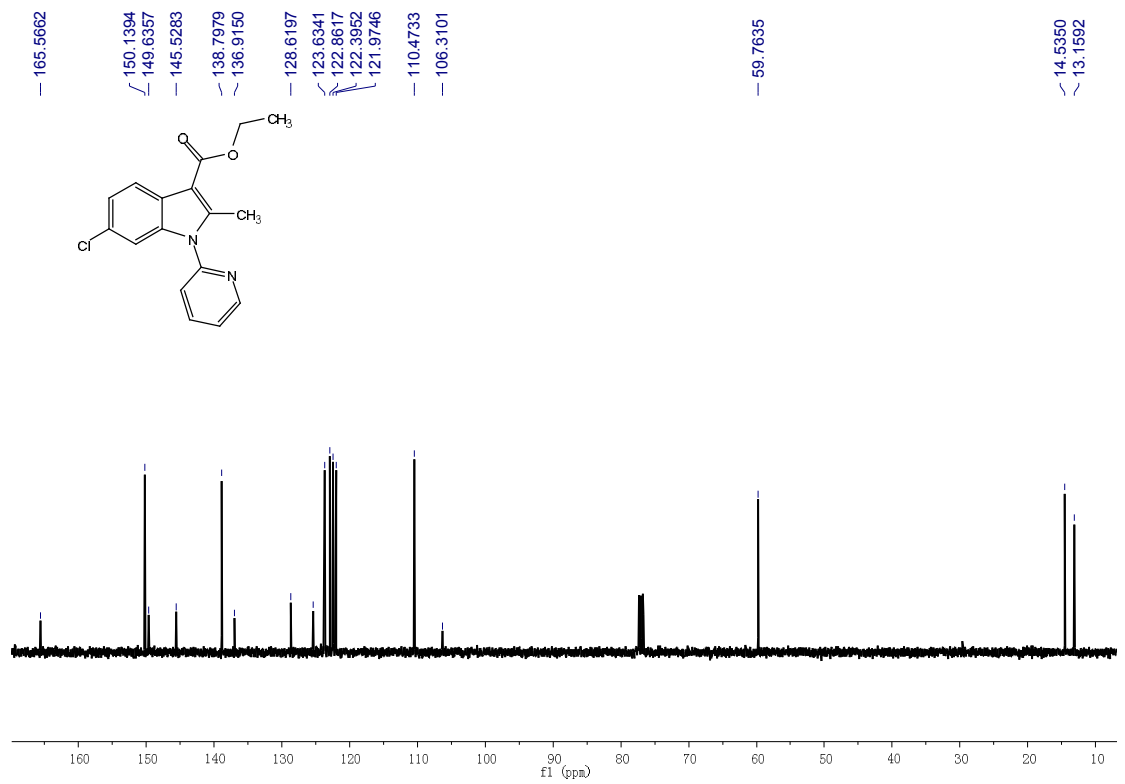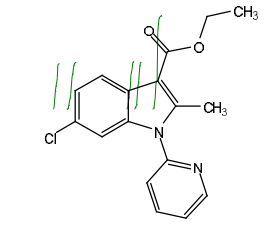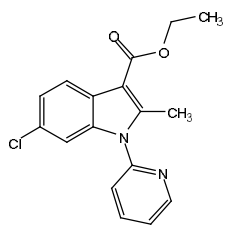

**3ka**

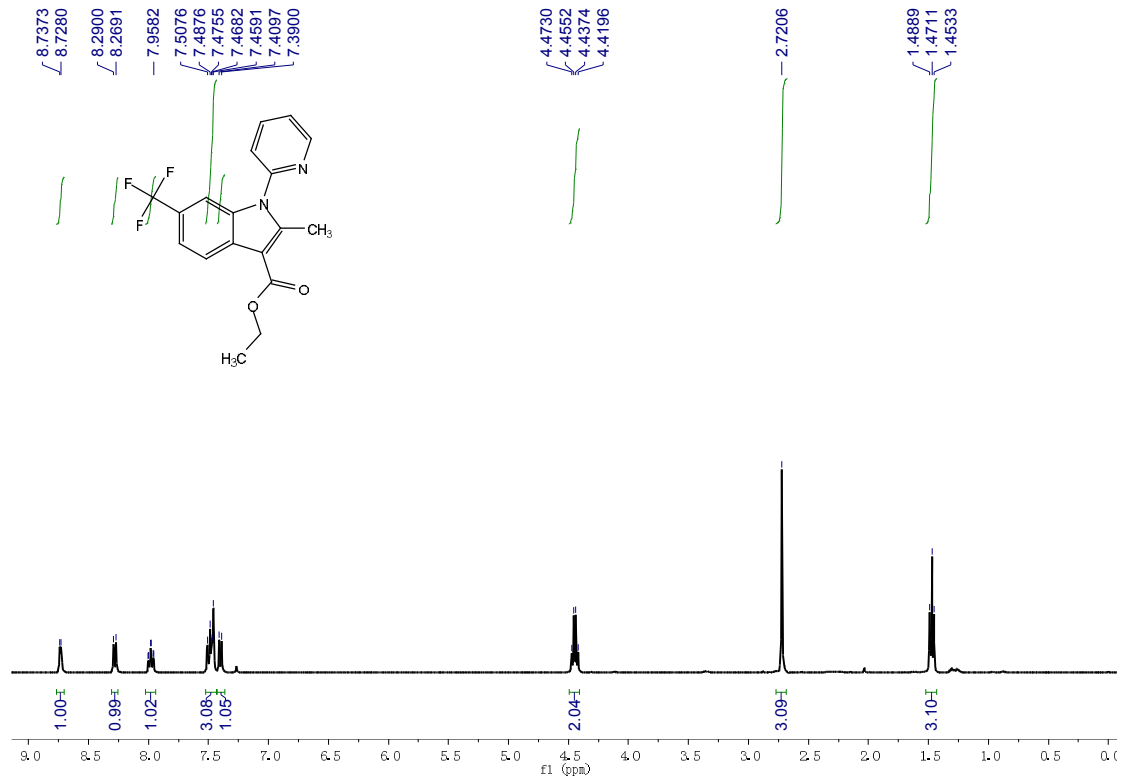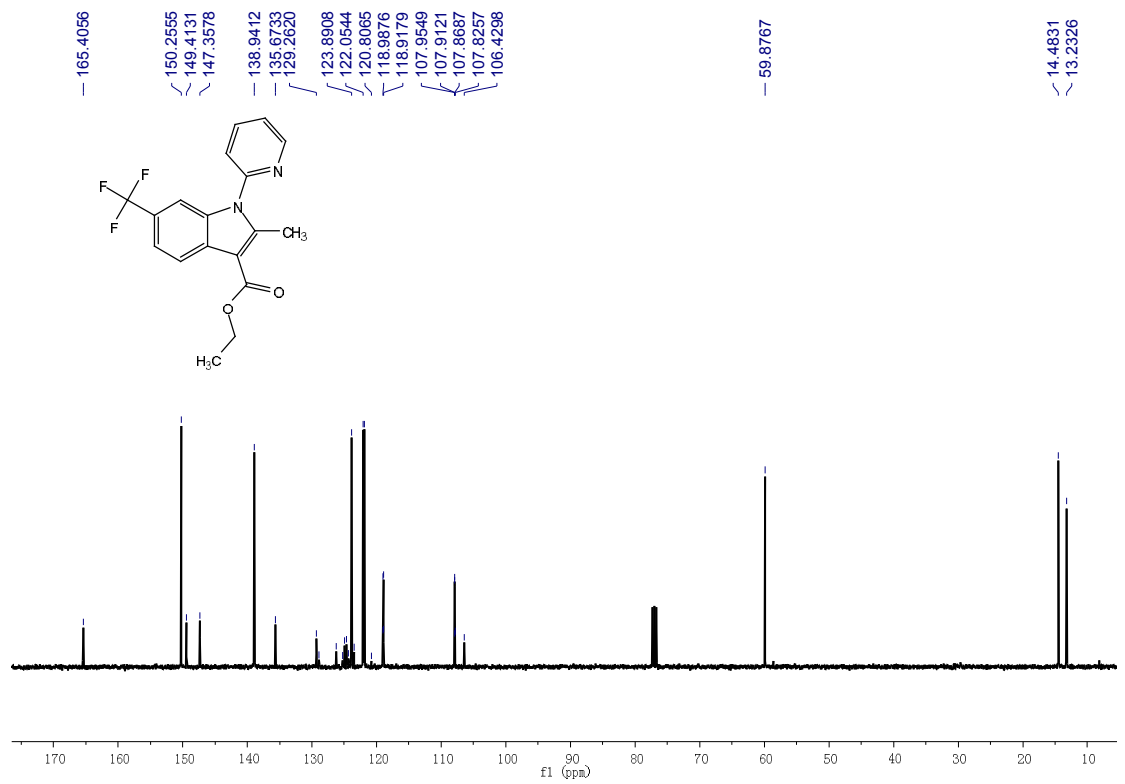

3la

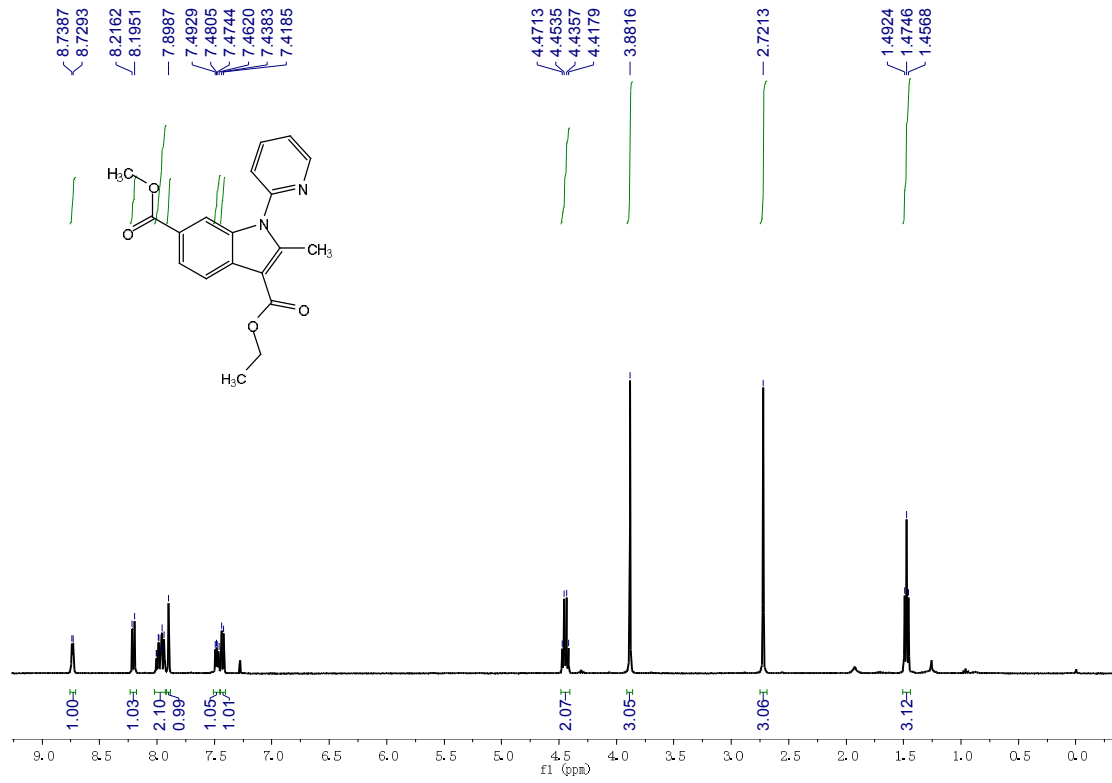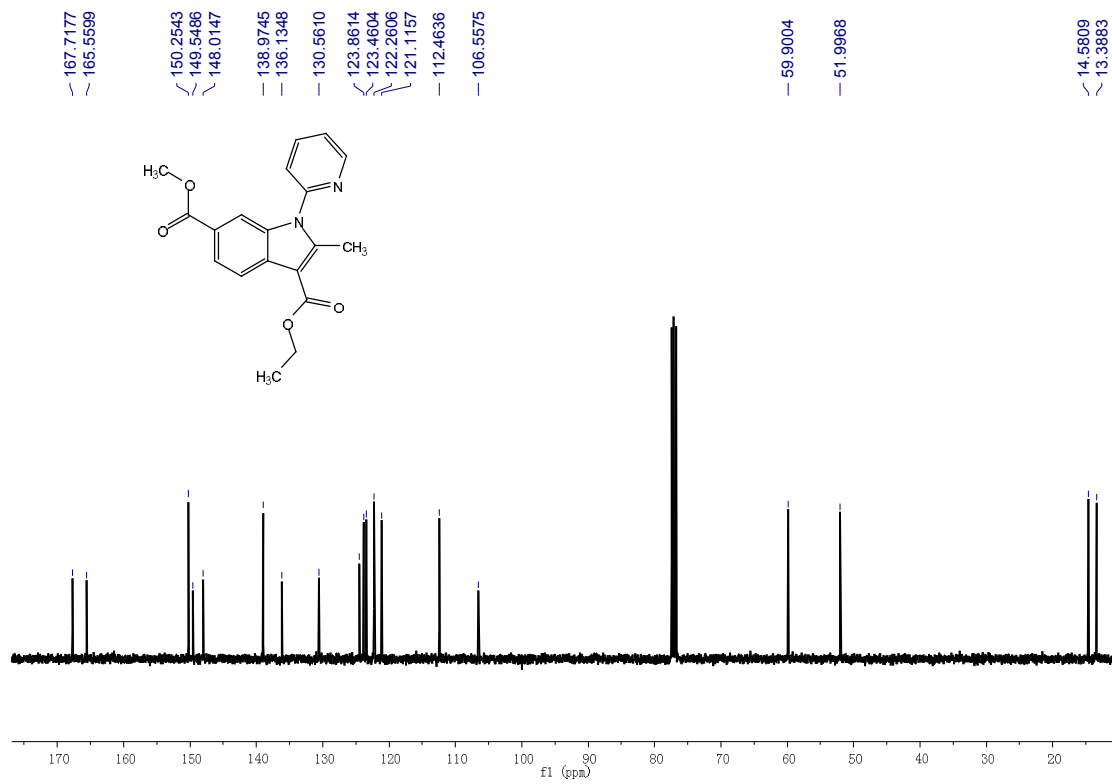

**3ma**

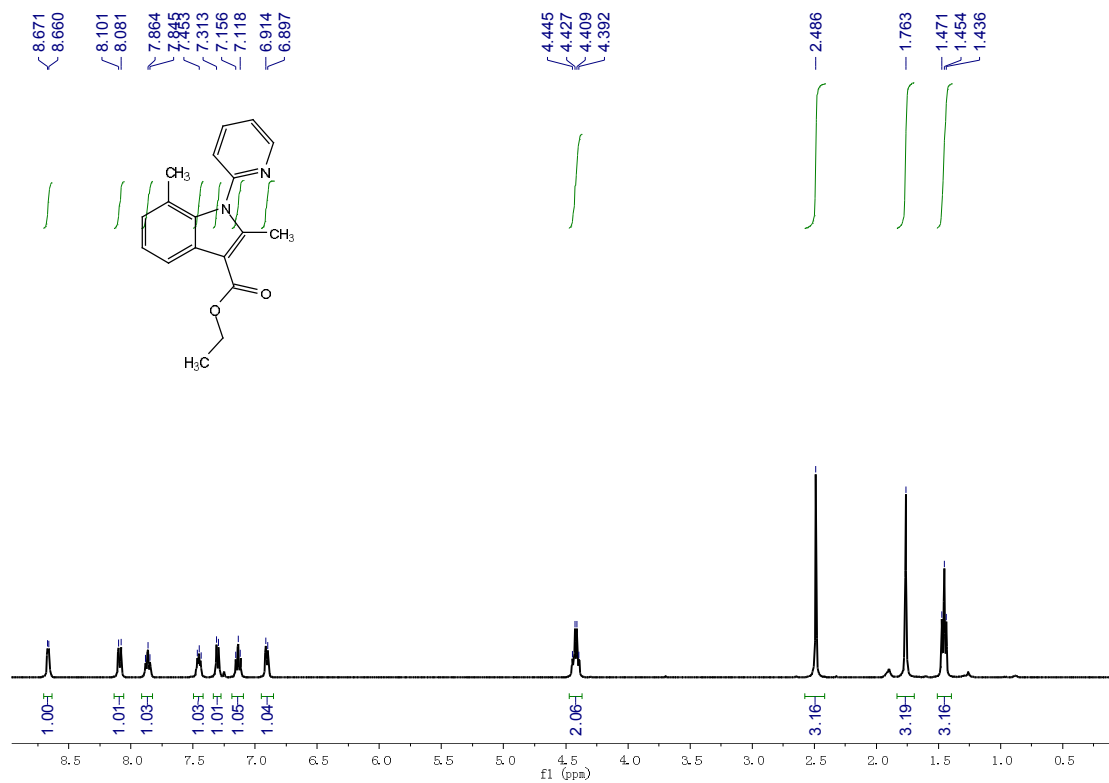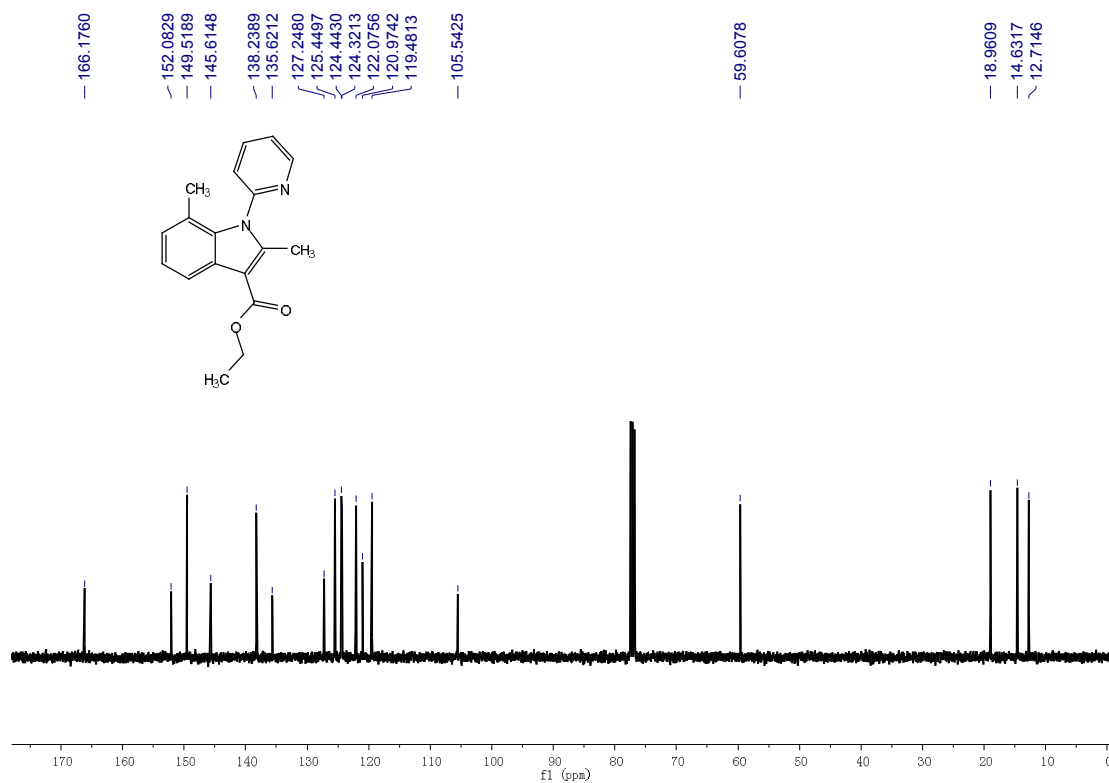

3na

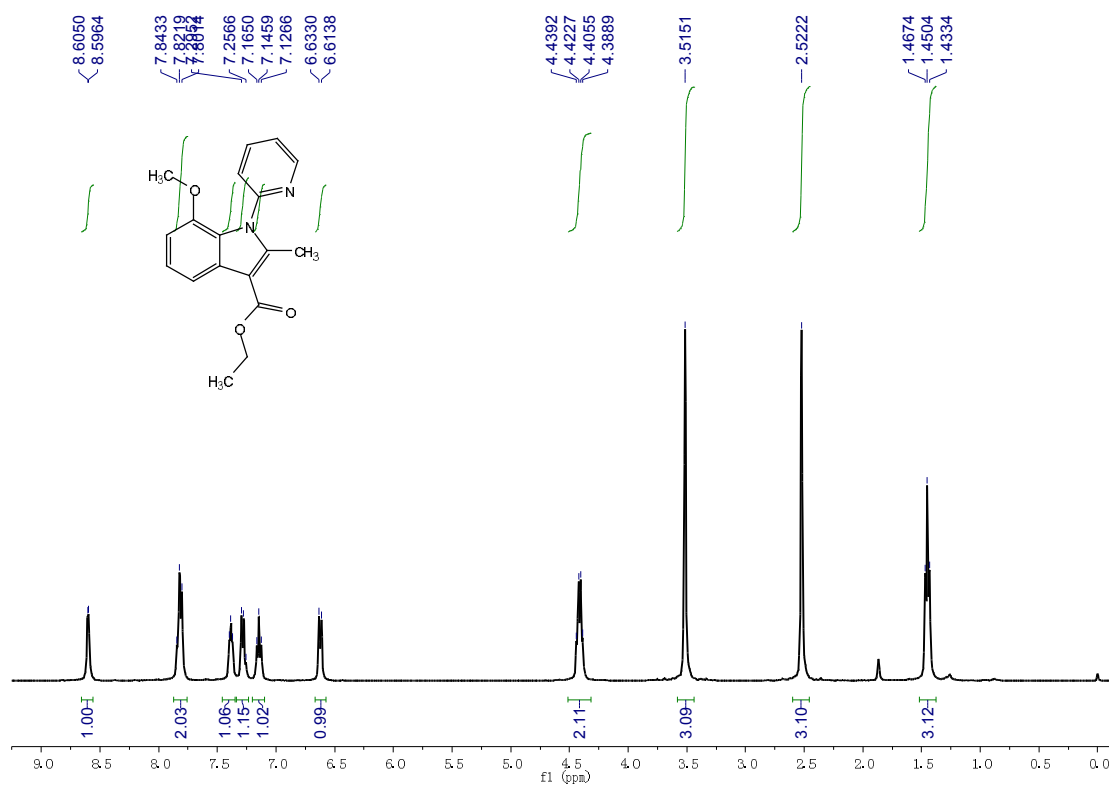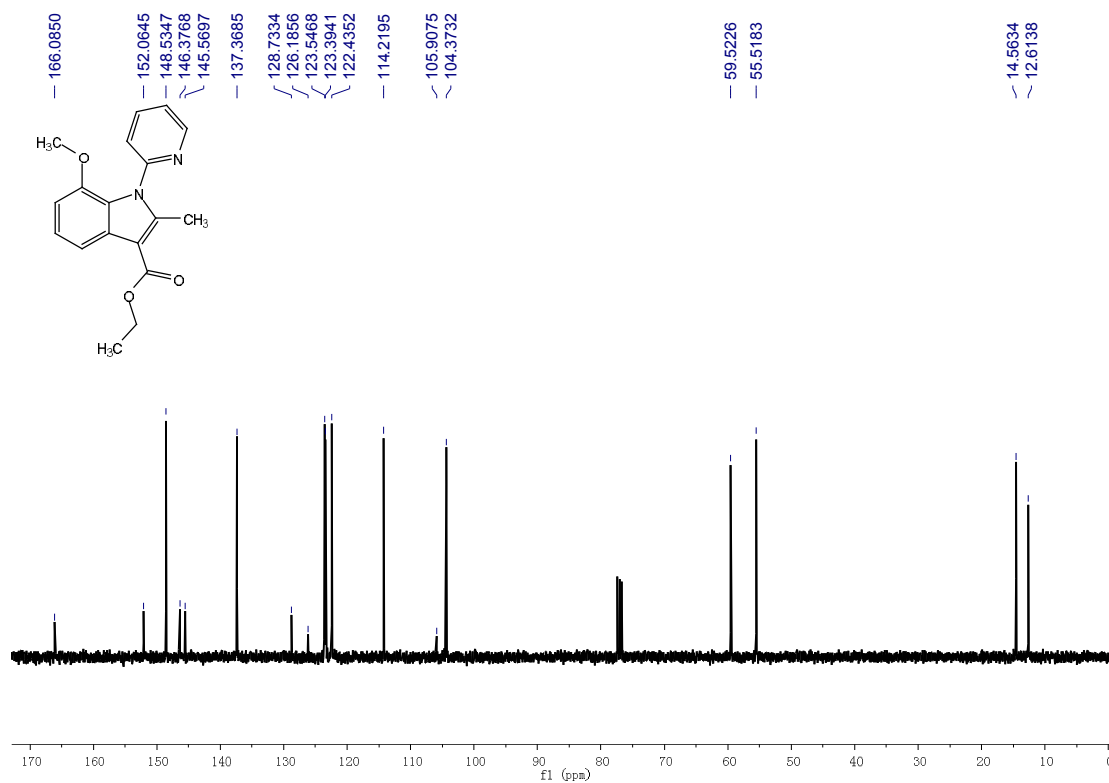



30a

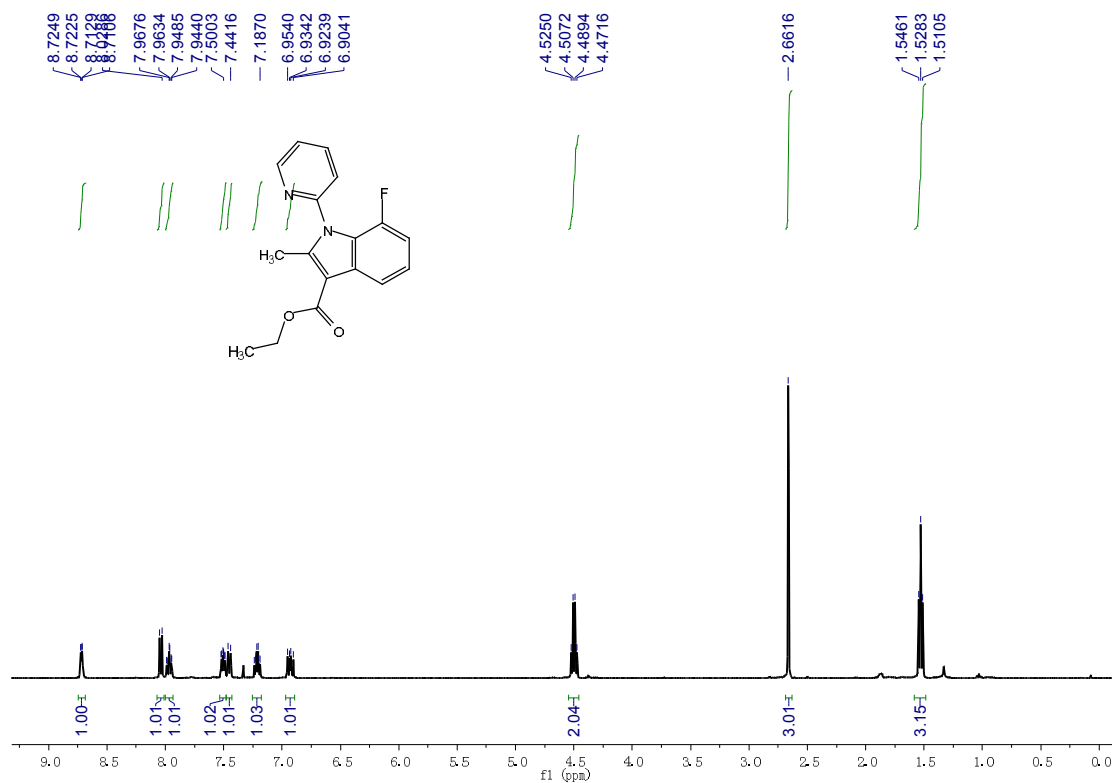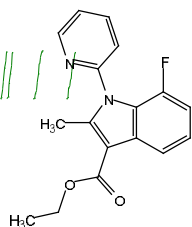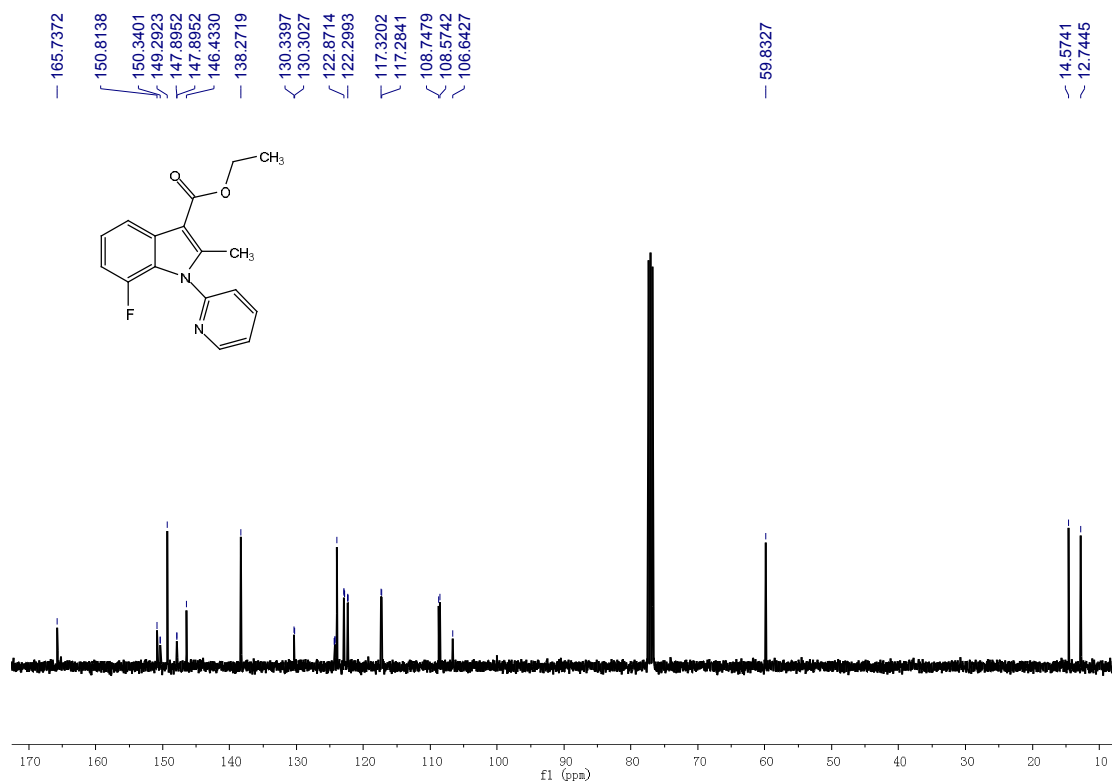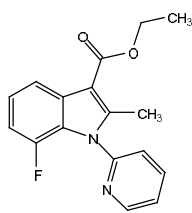

3pa

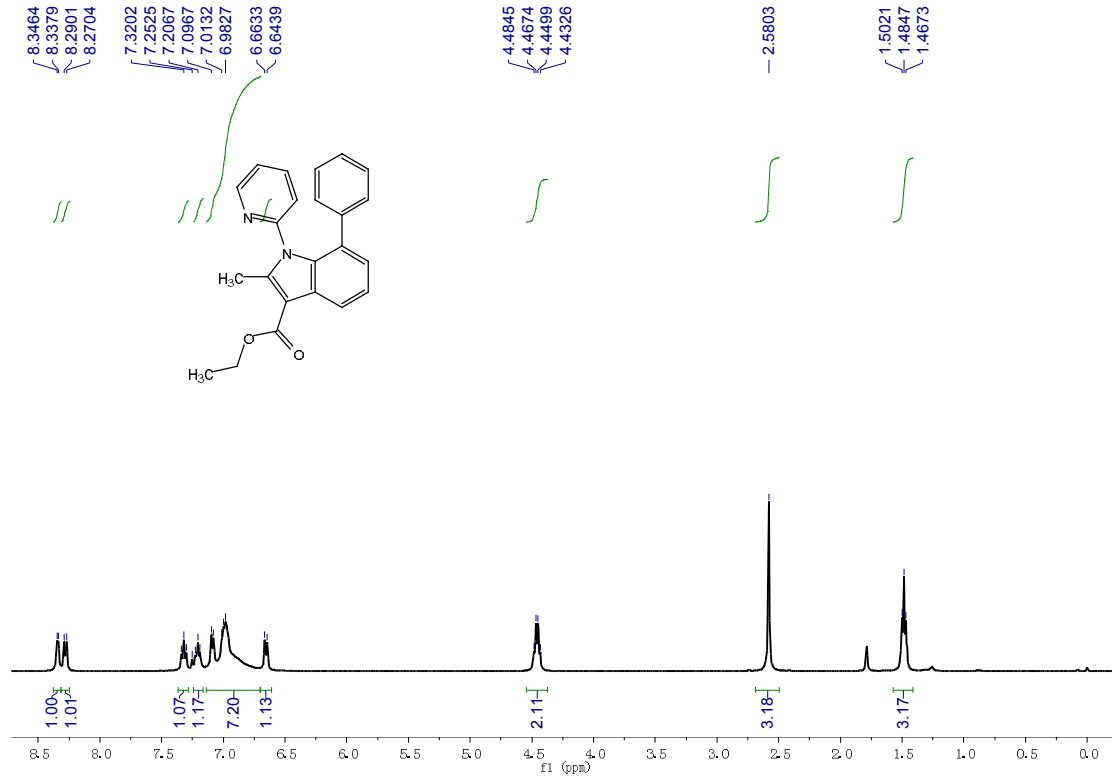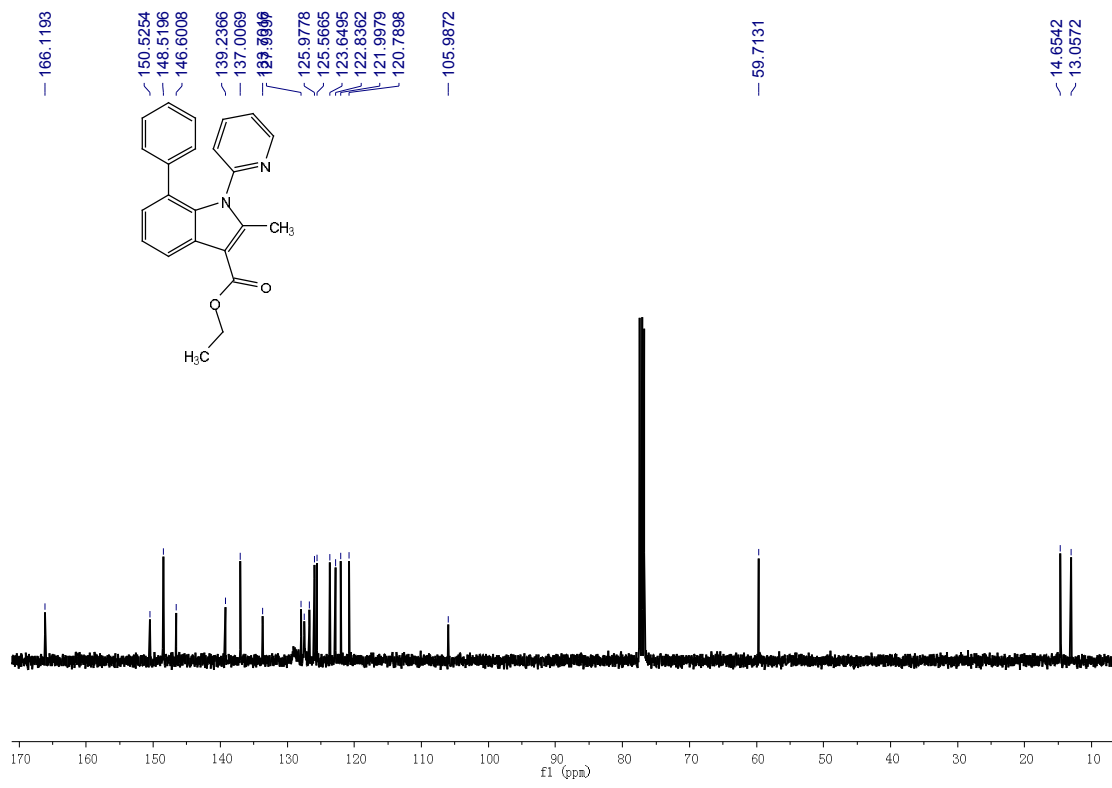

**3qa**

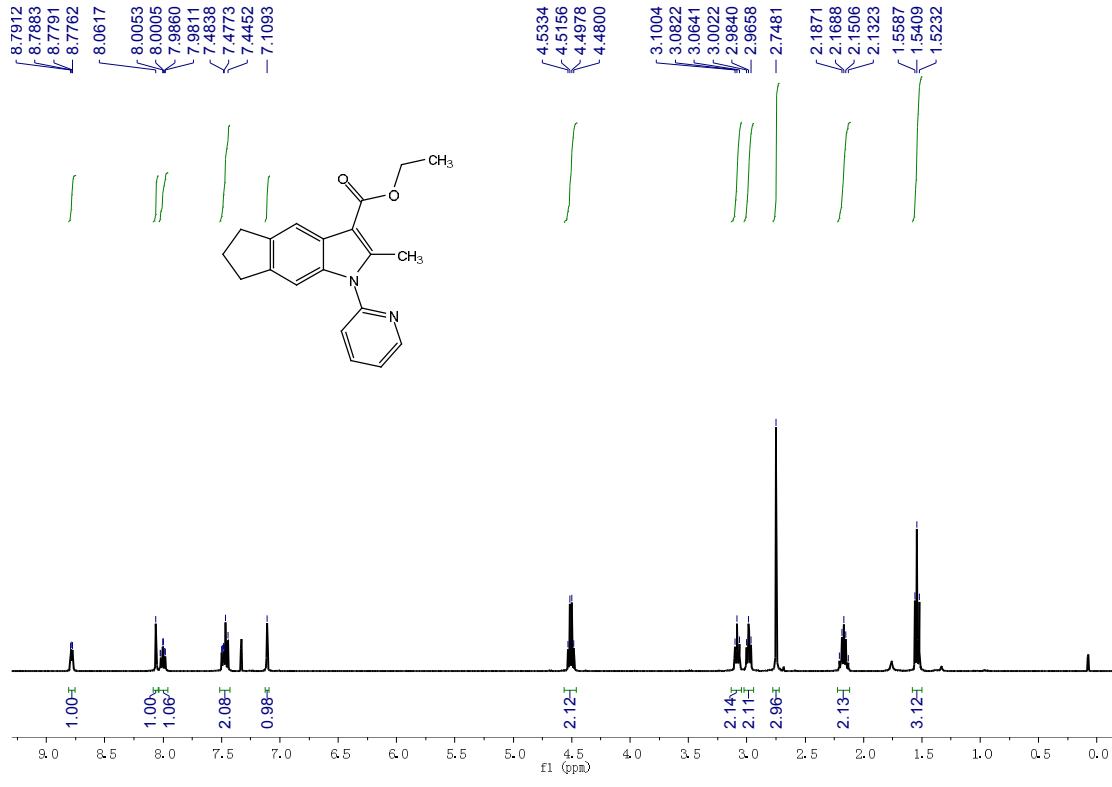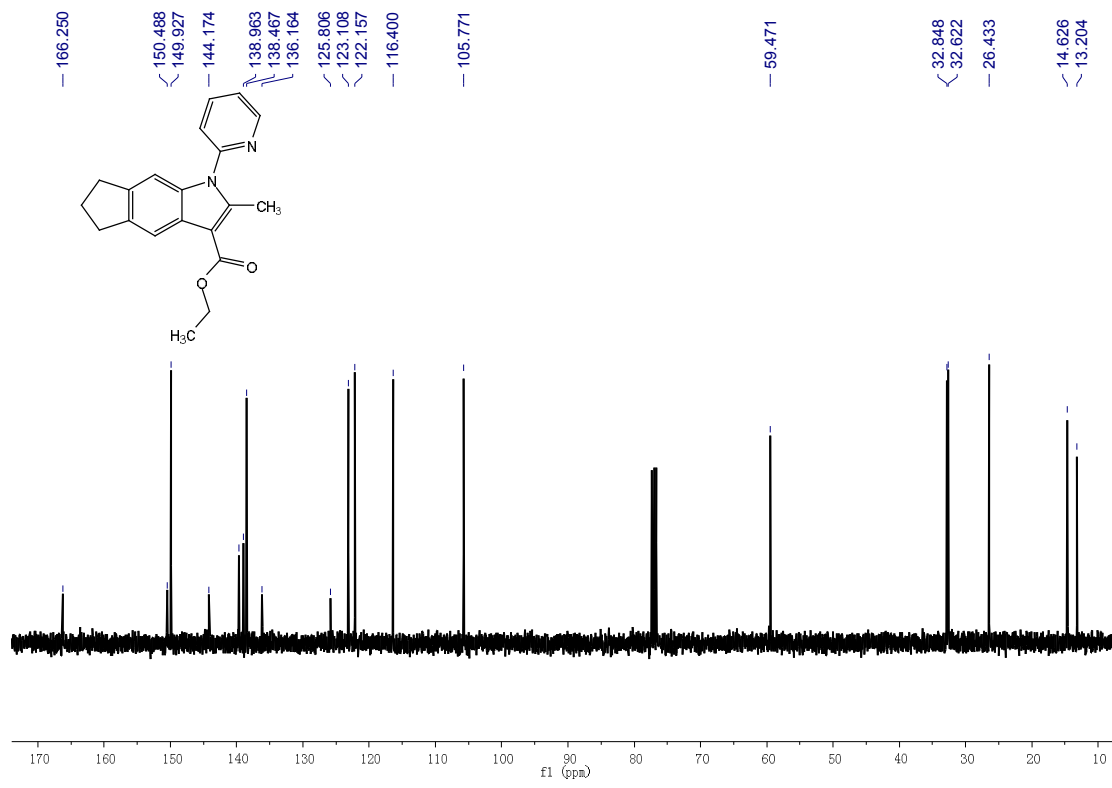

**3mb**

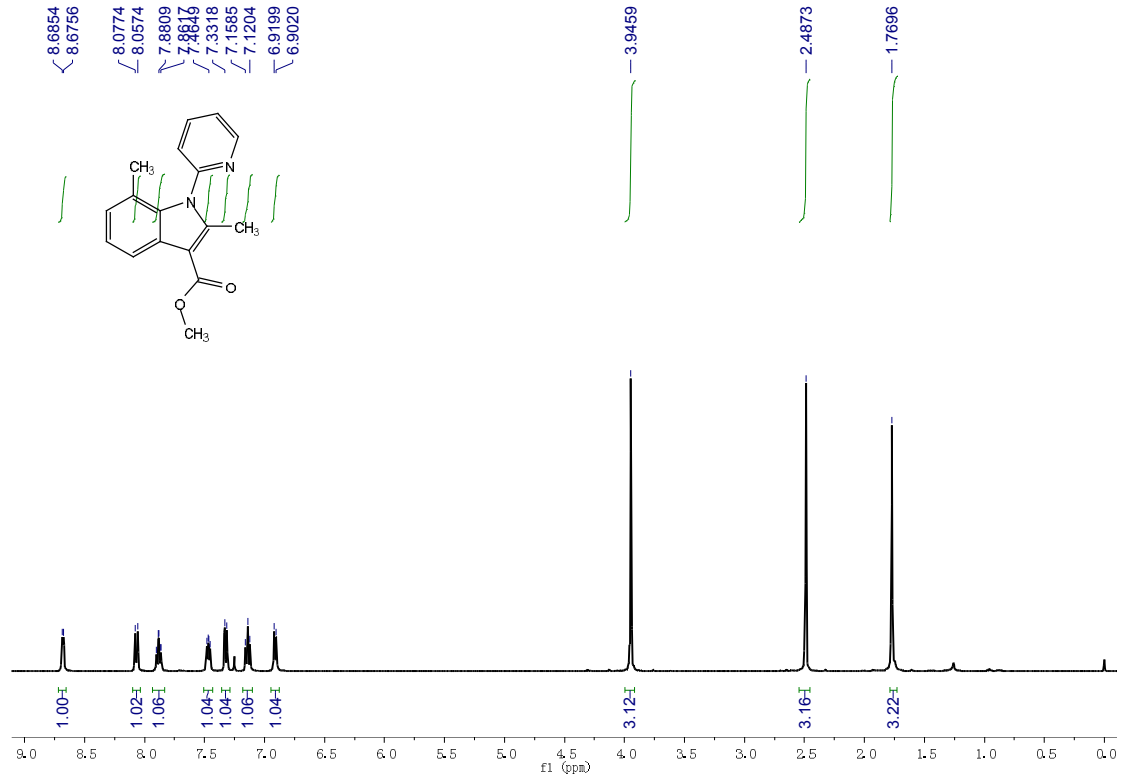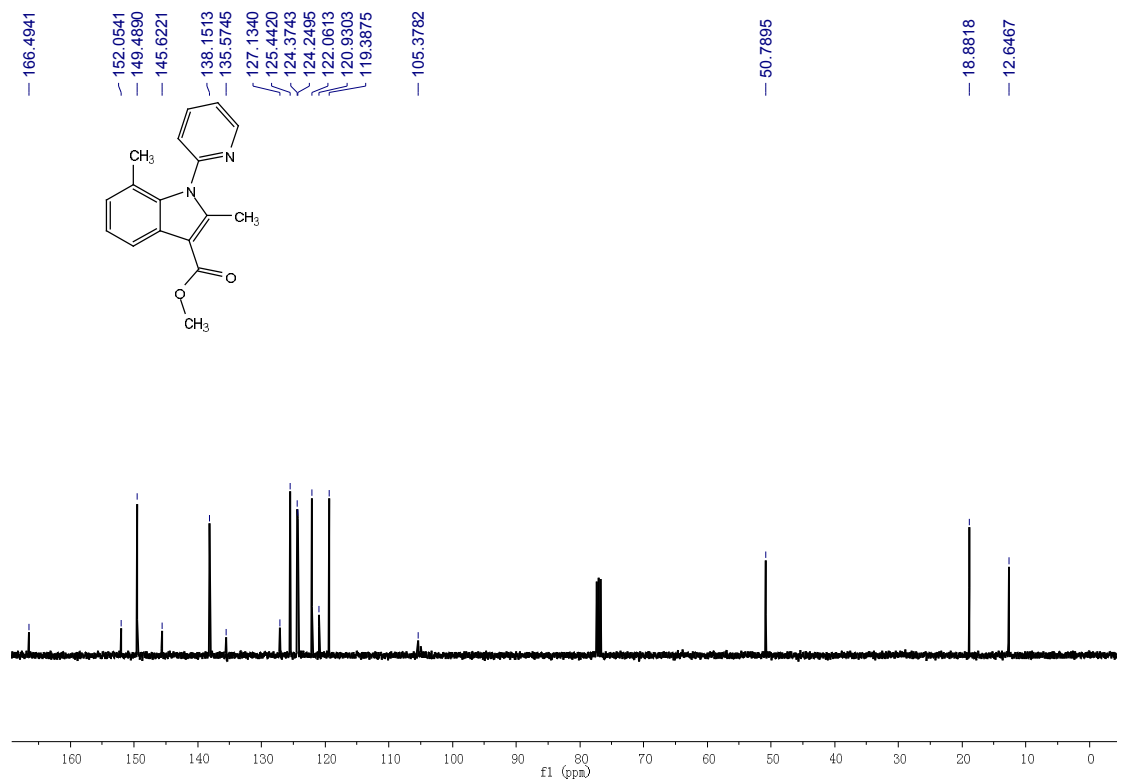

**3hc**

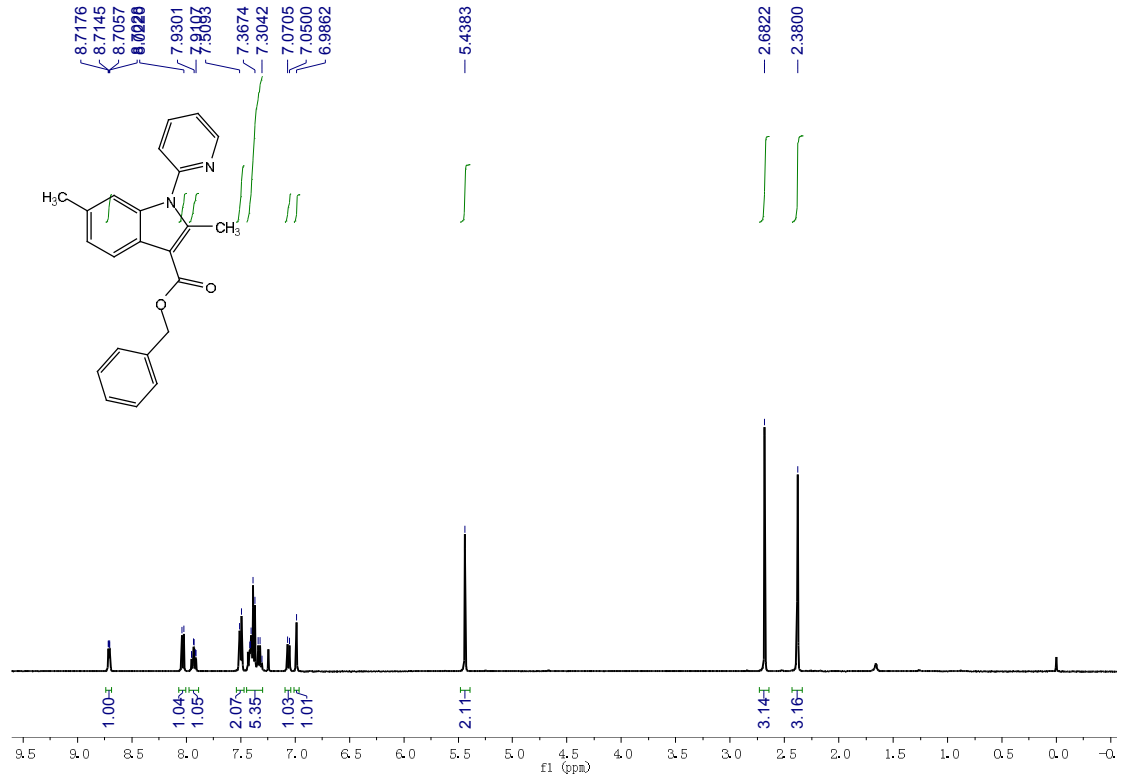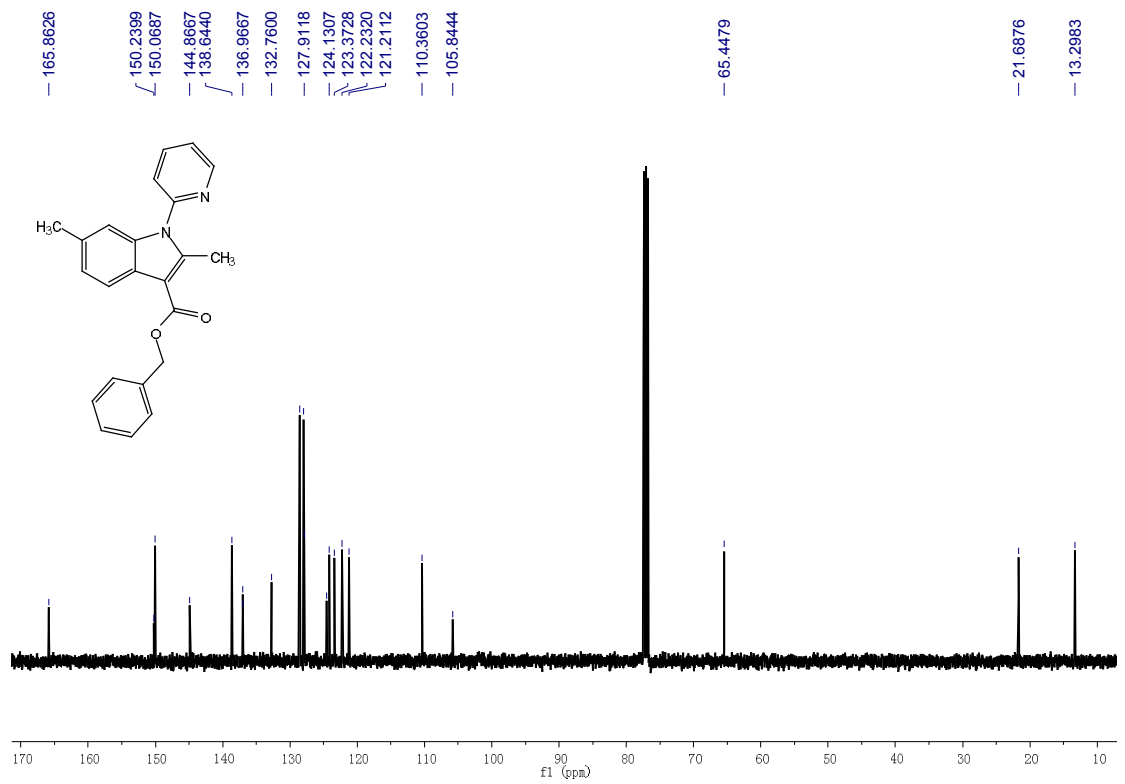

**3hd**

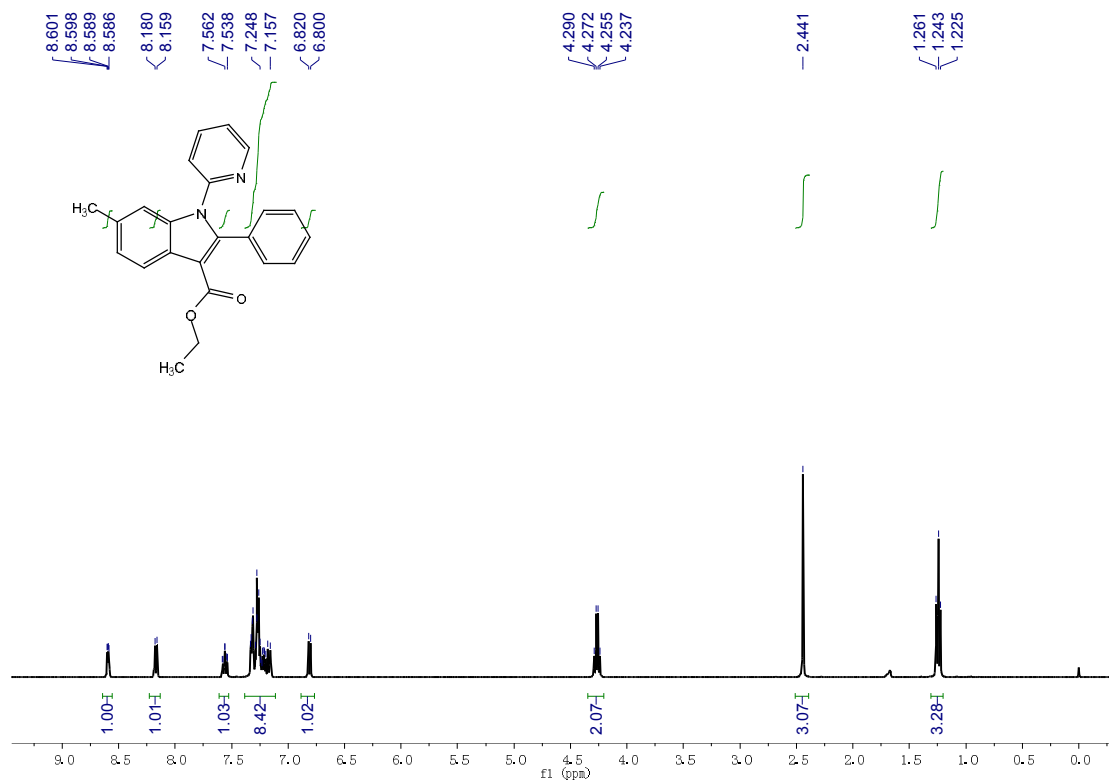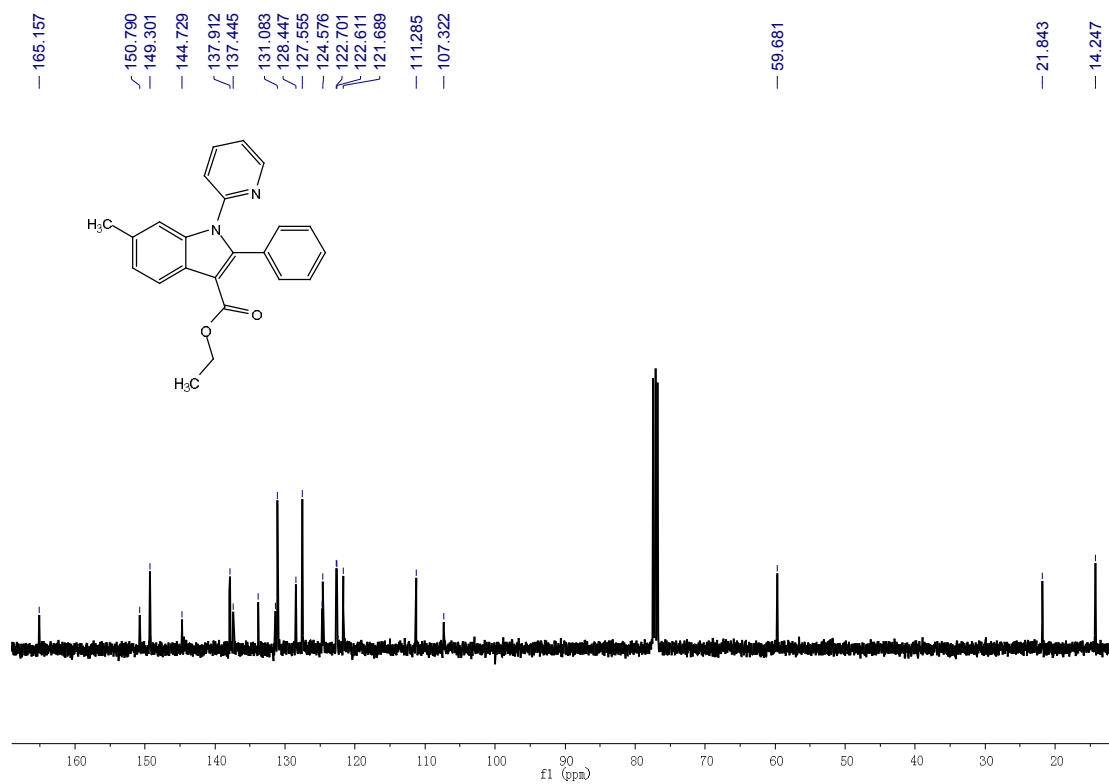

**3ra**

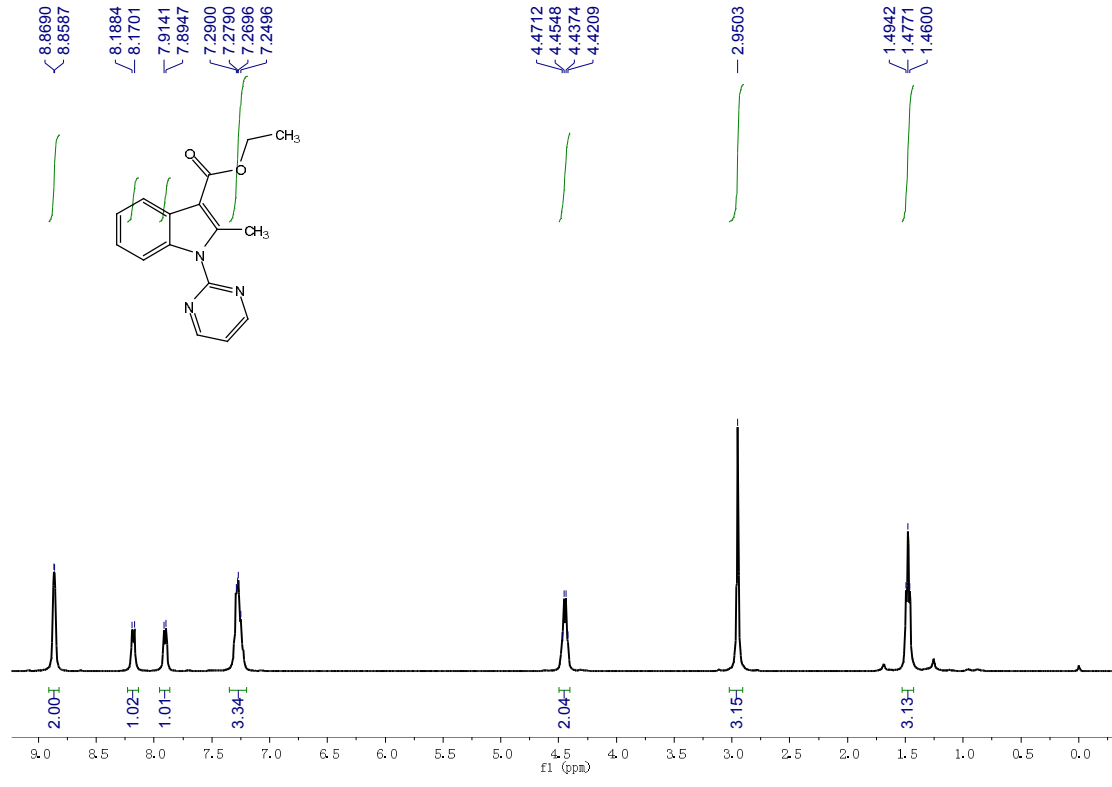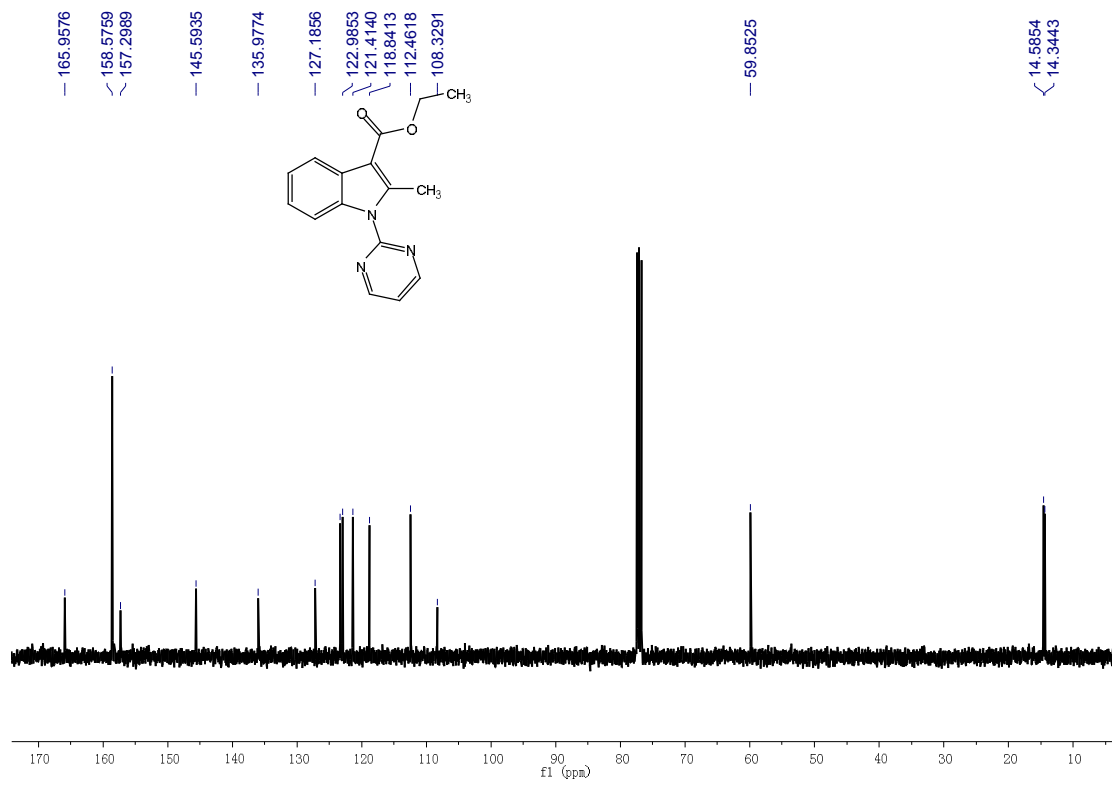

3sa

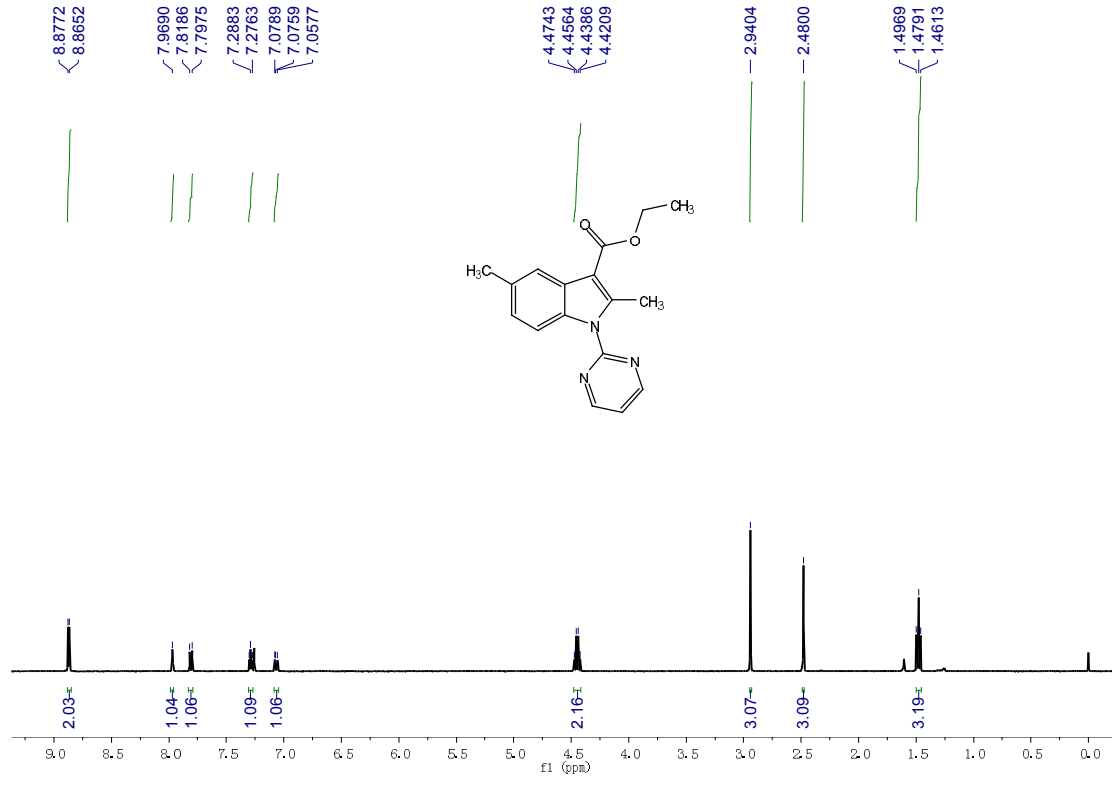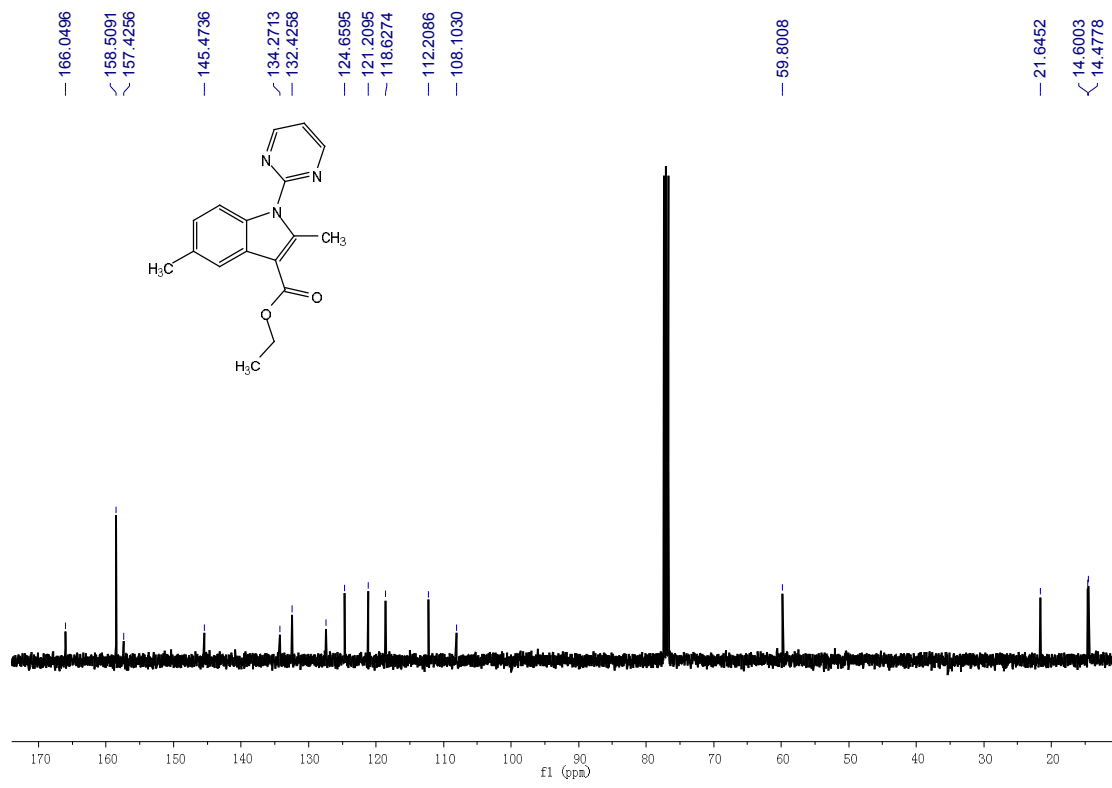



3ta

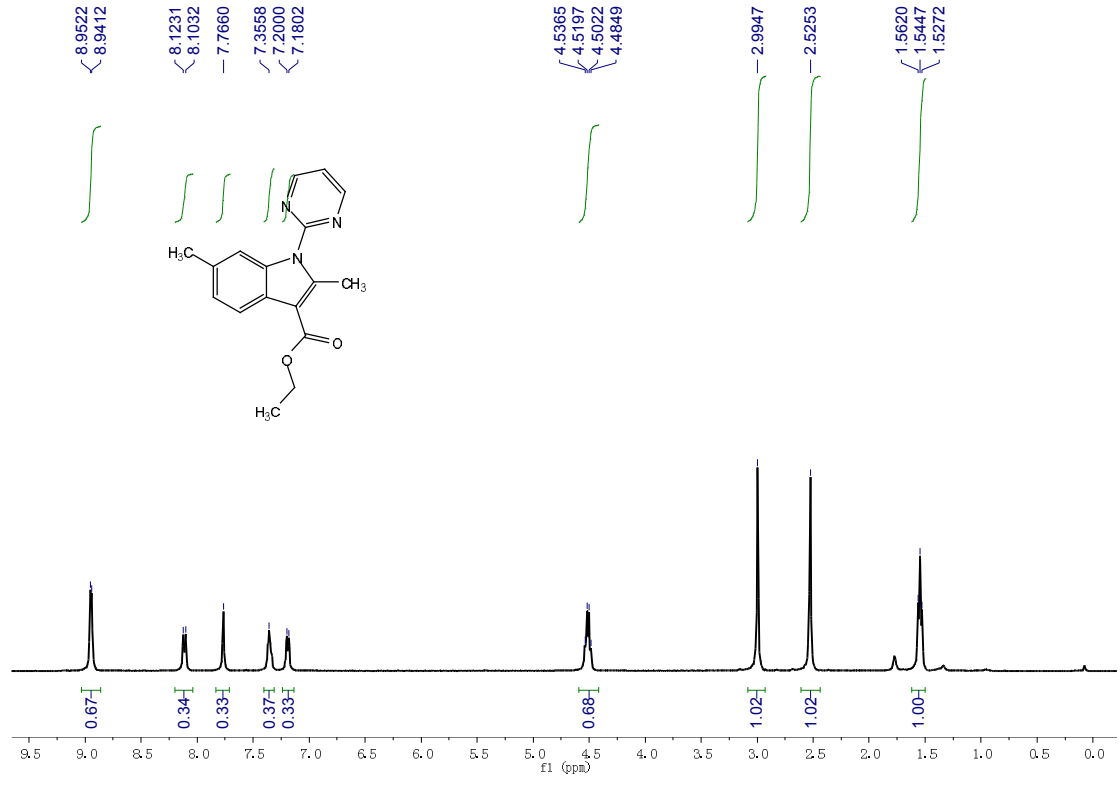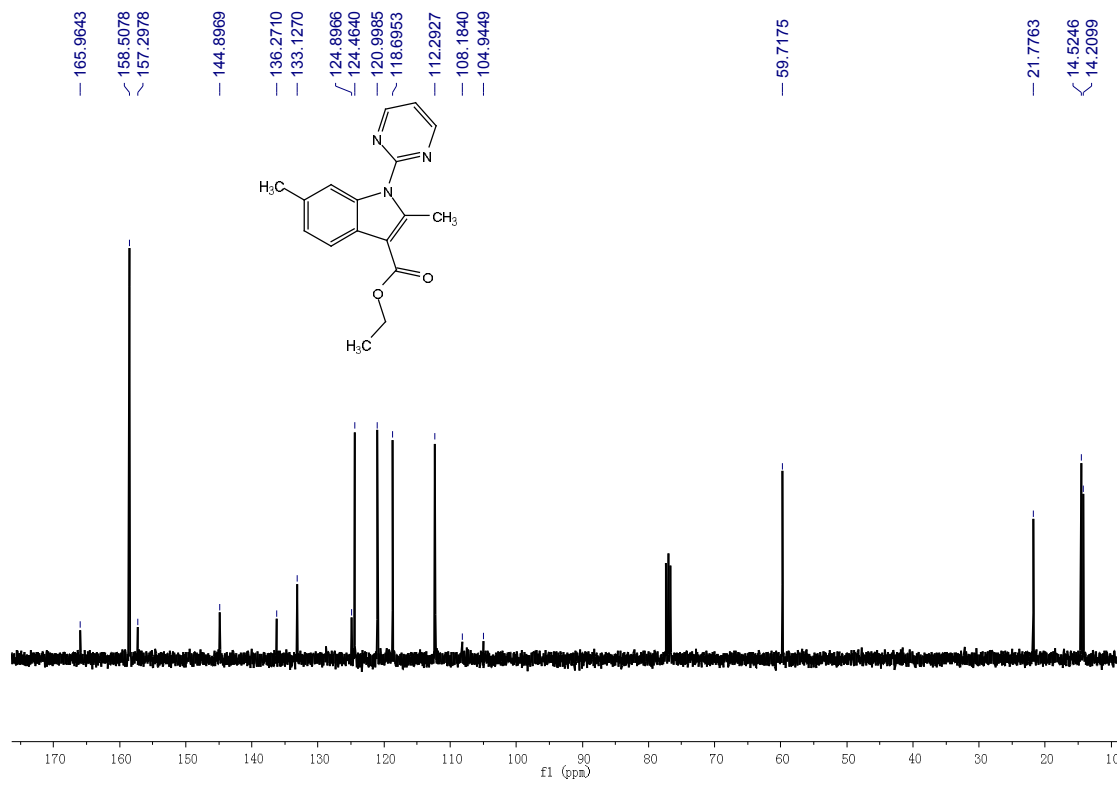

3ua

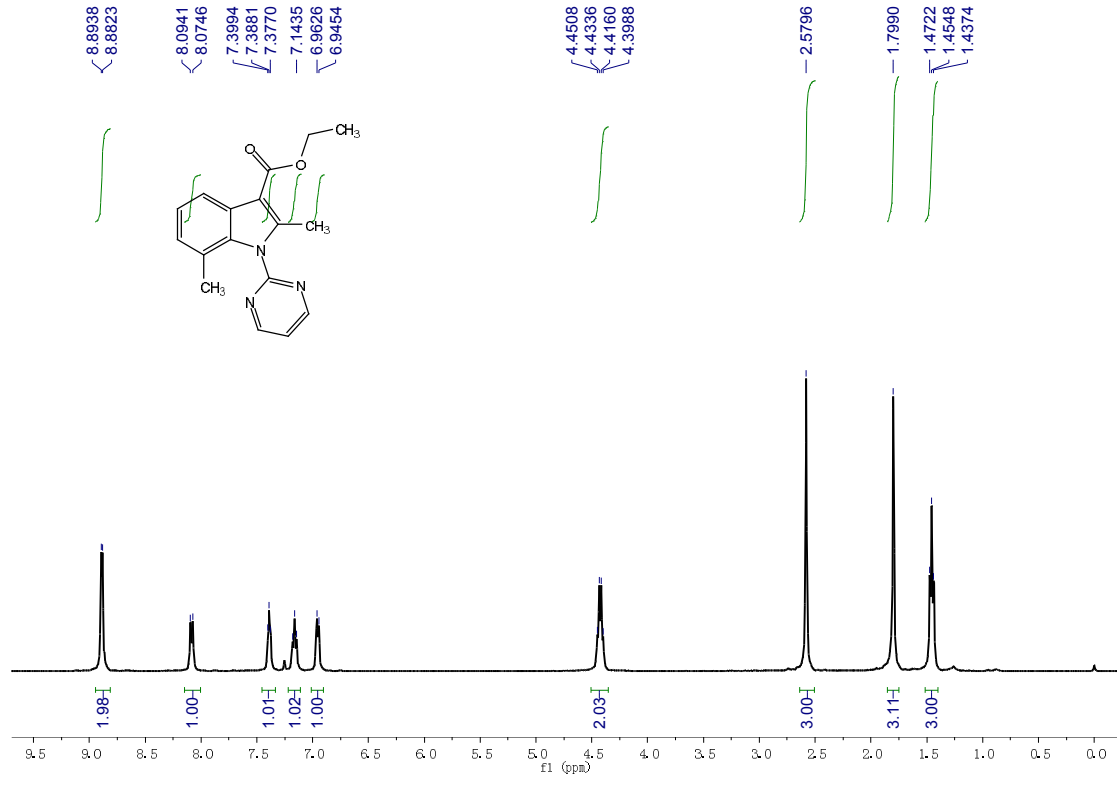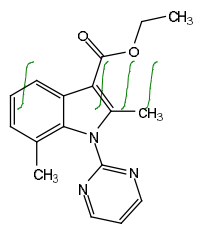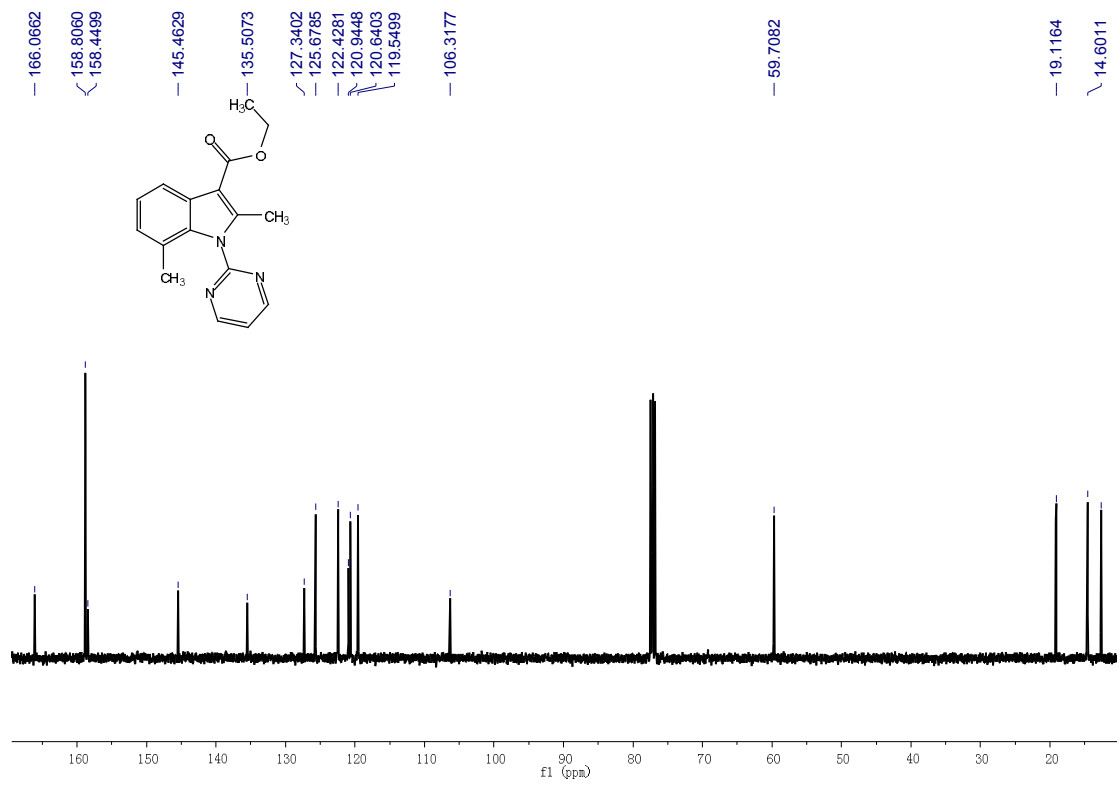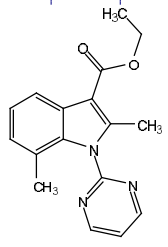

**3va**

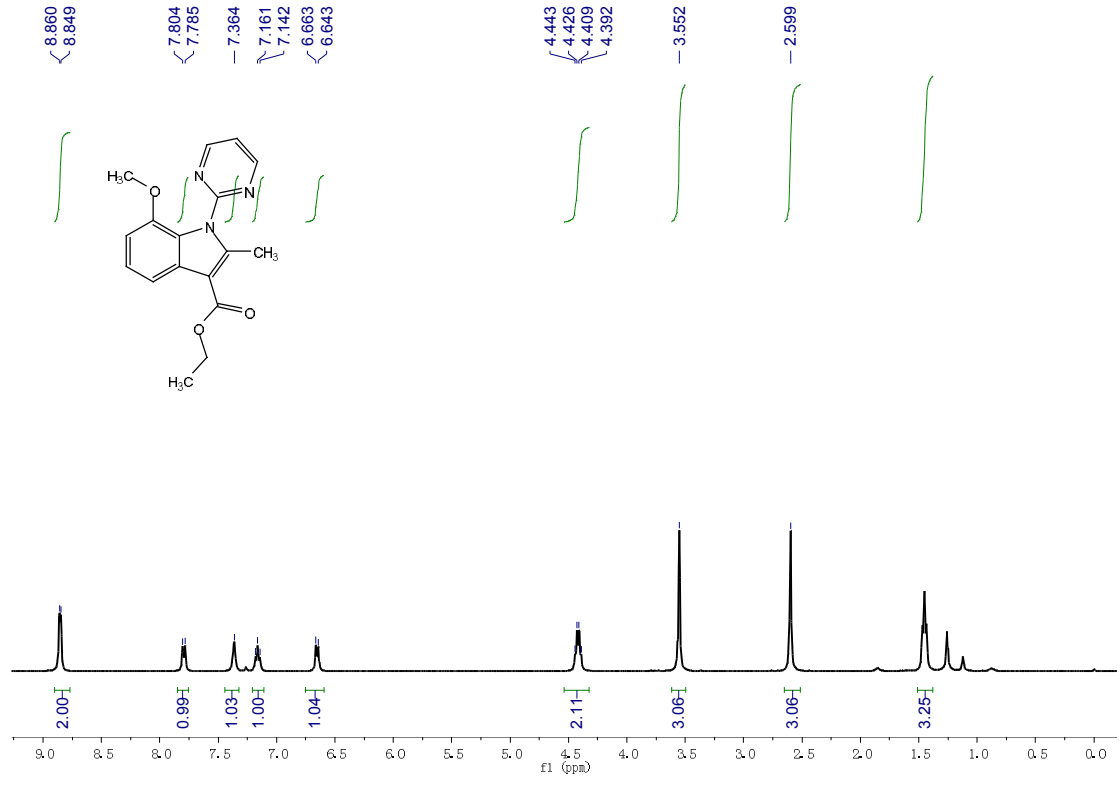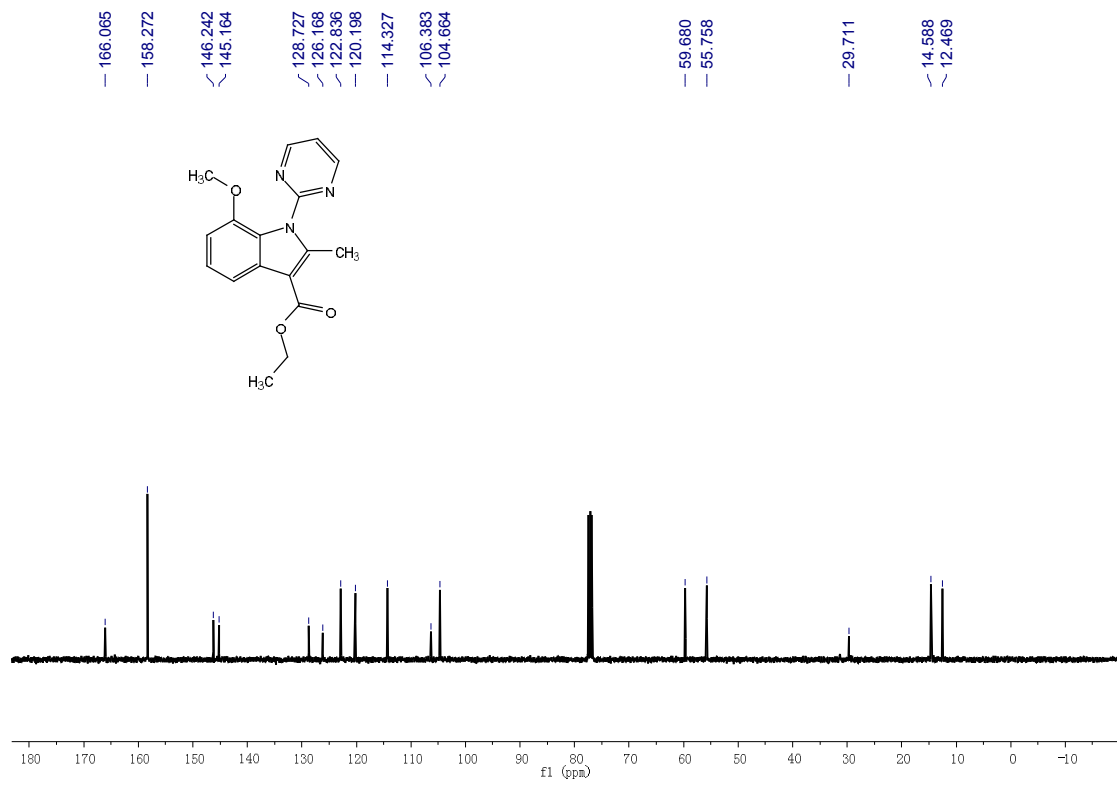

**5ba**

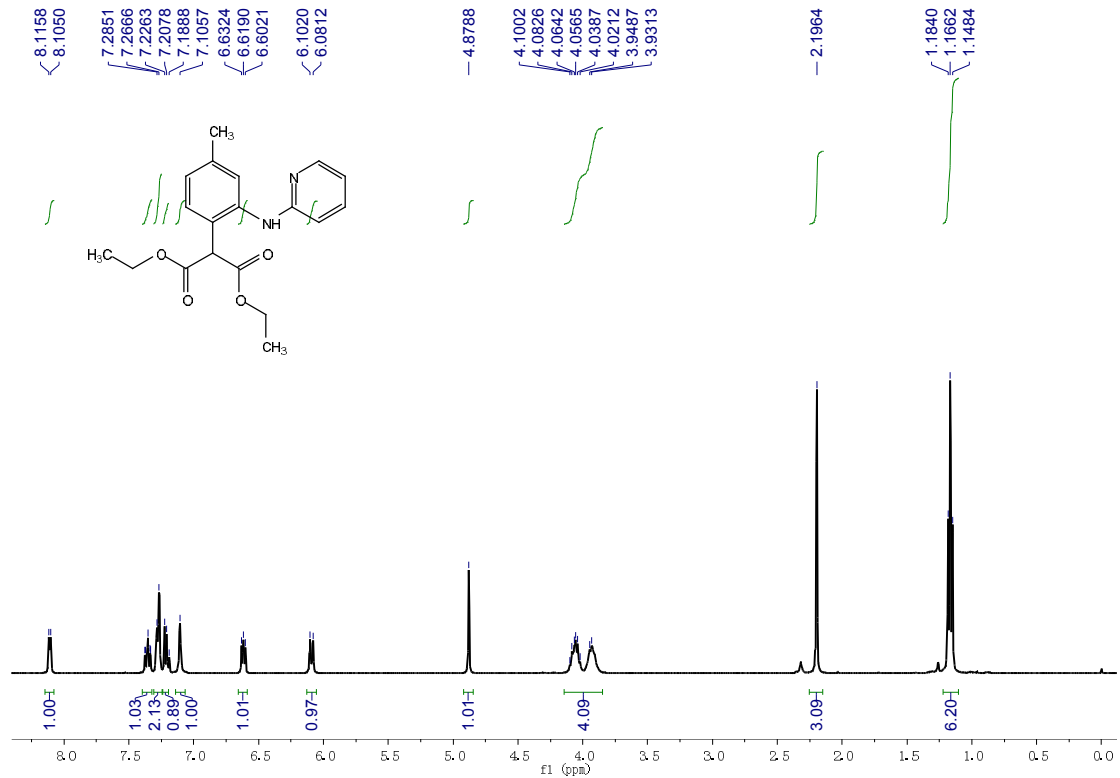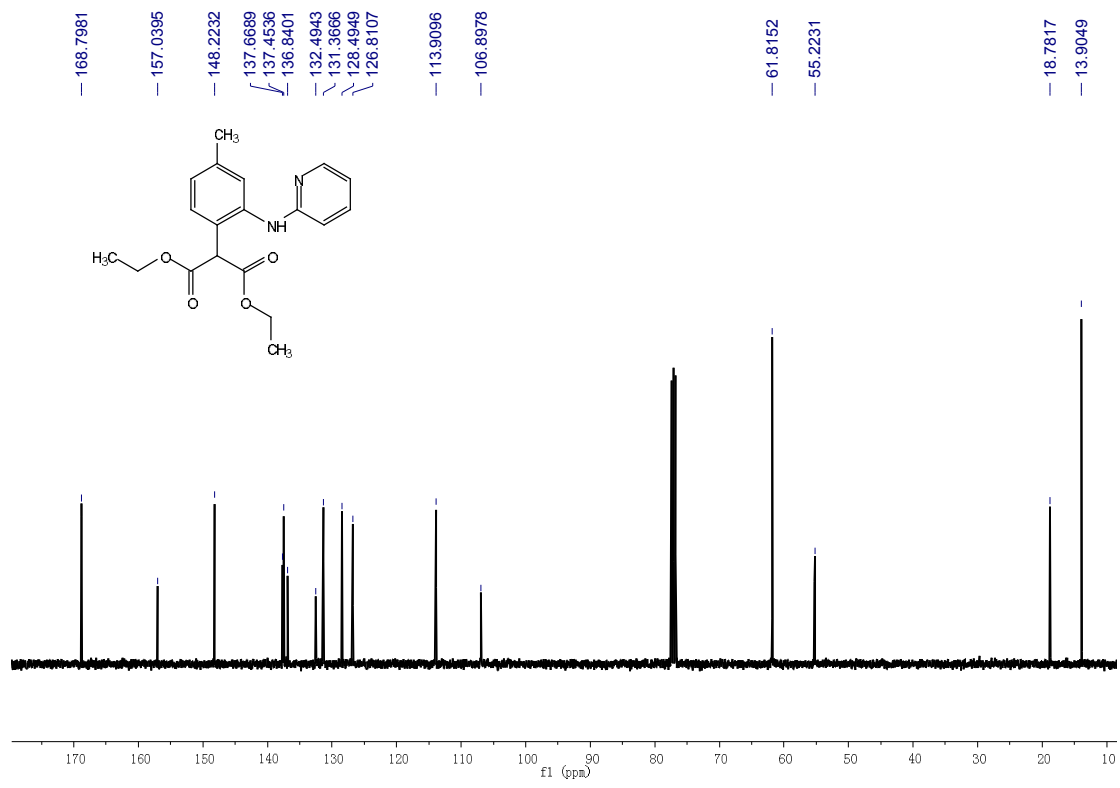

5ma

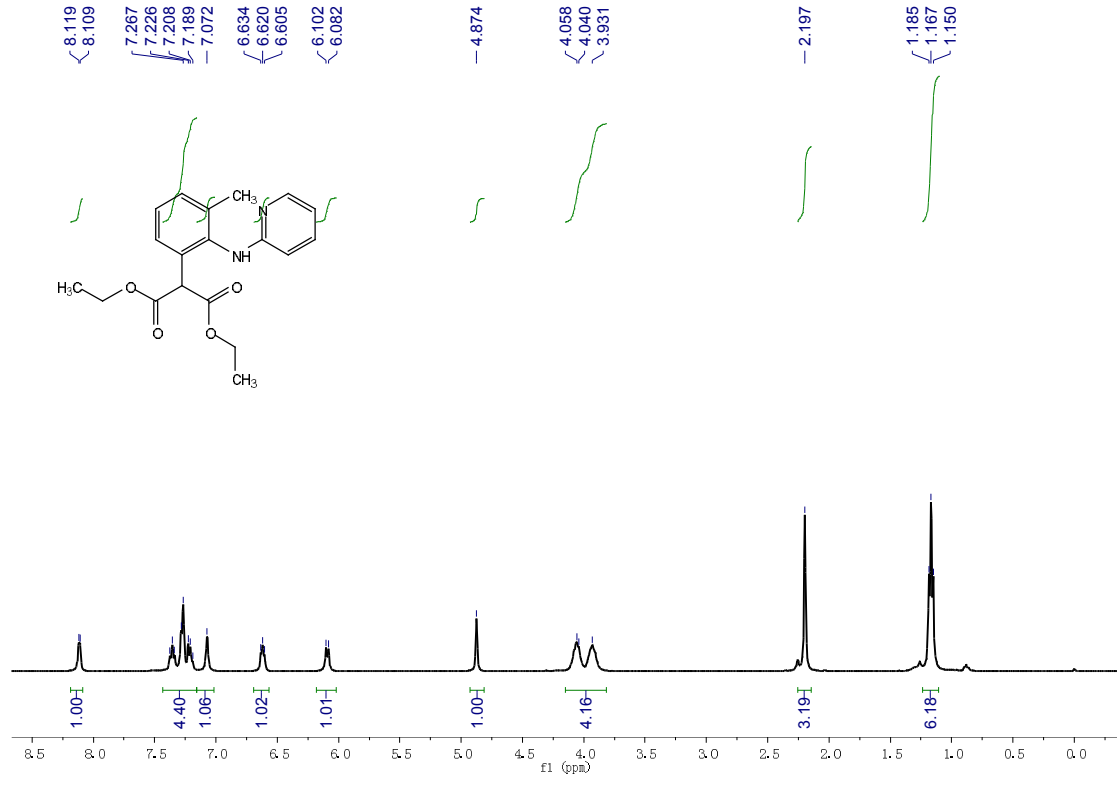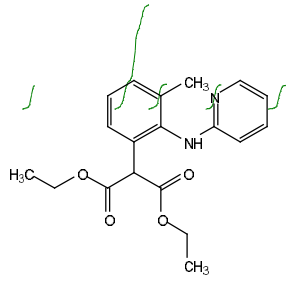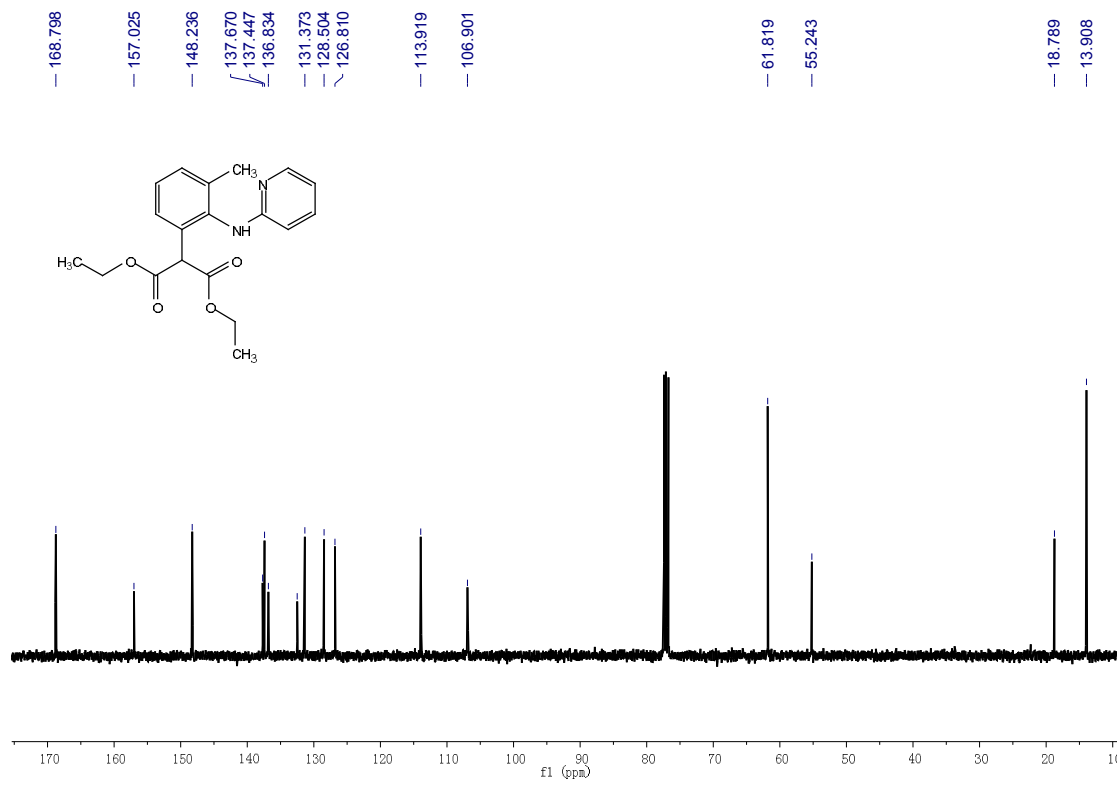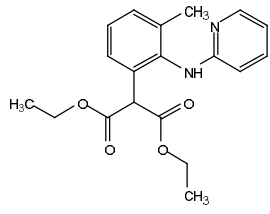

6

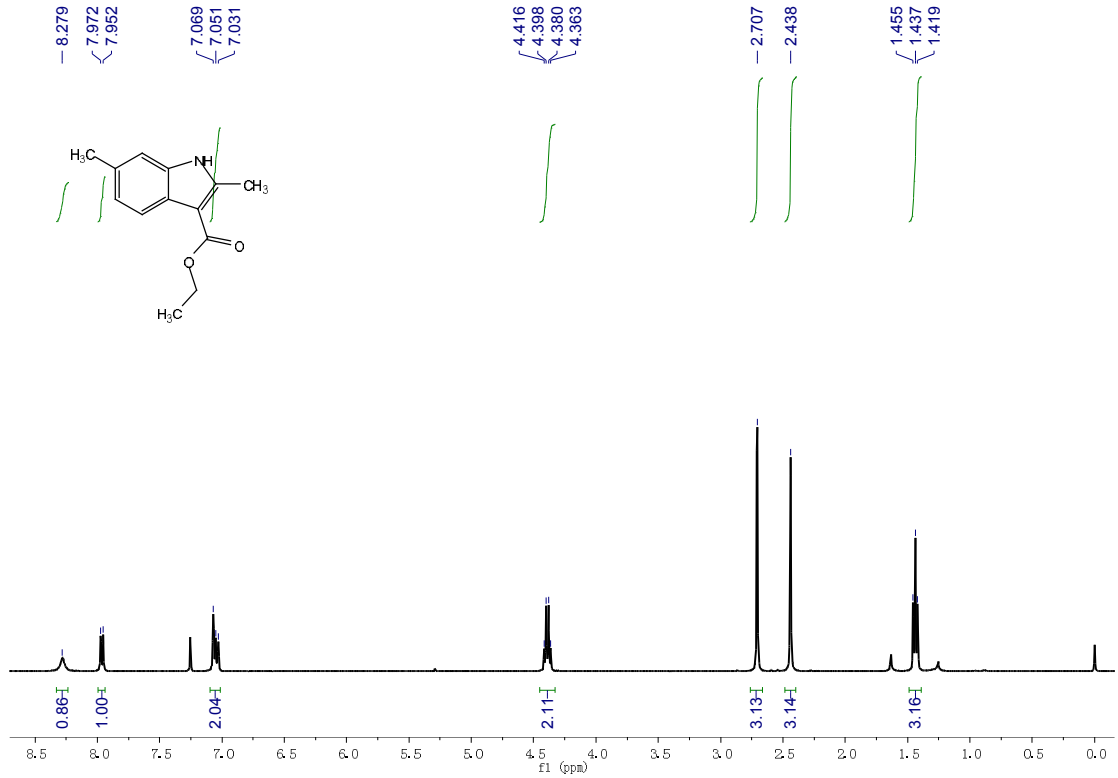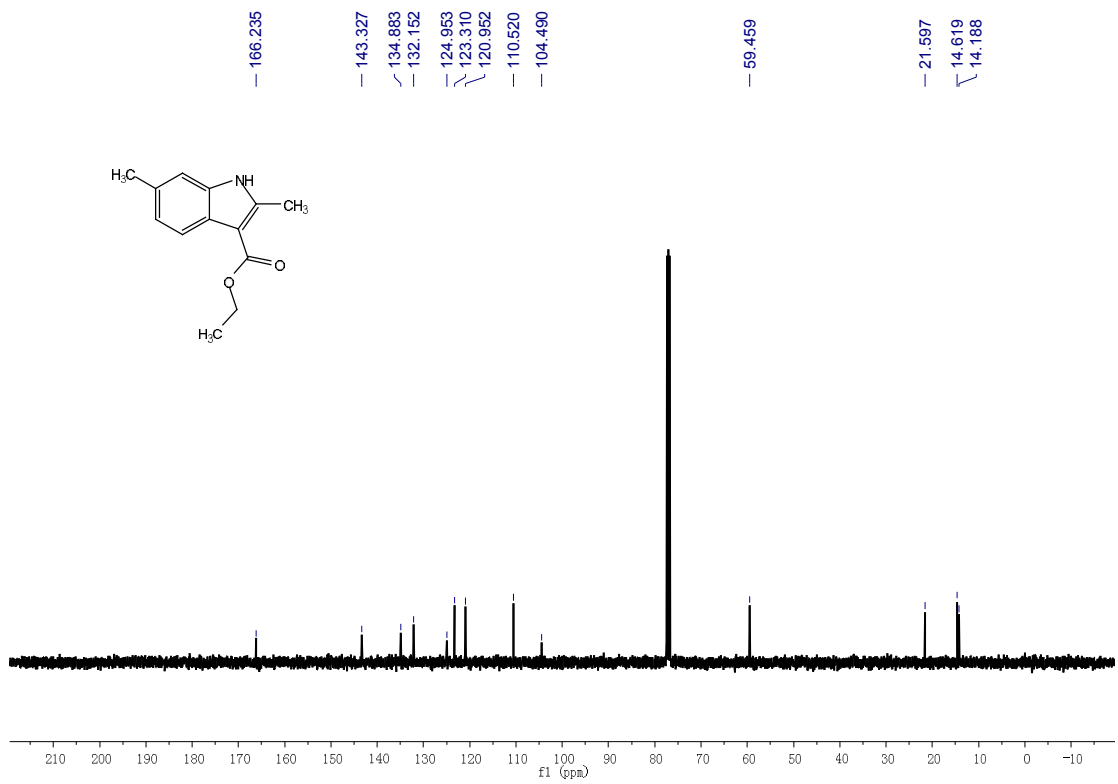

7

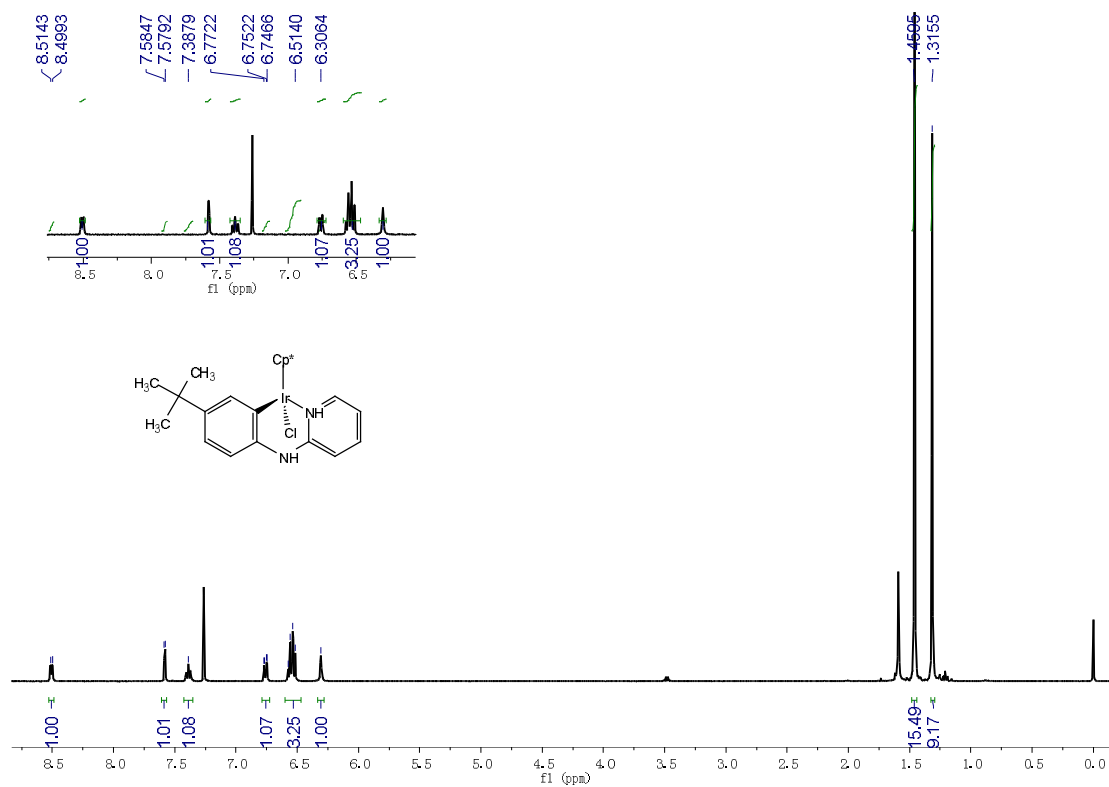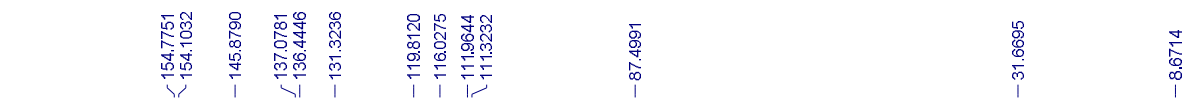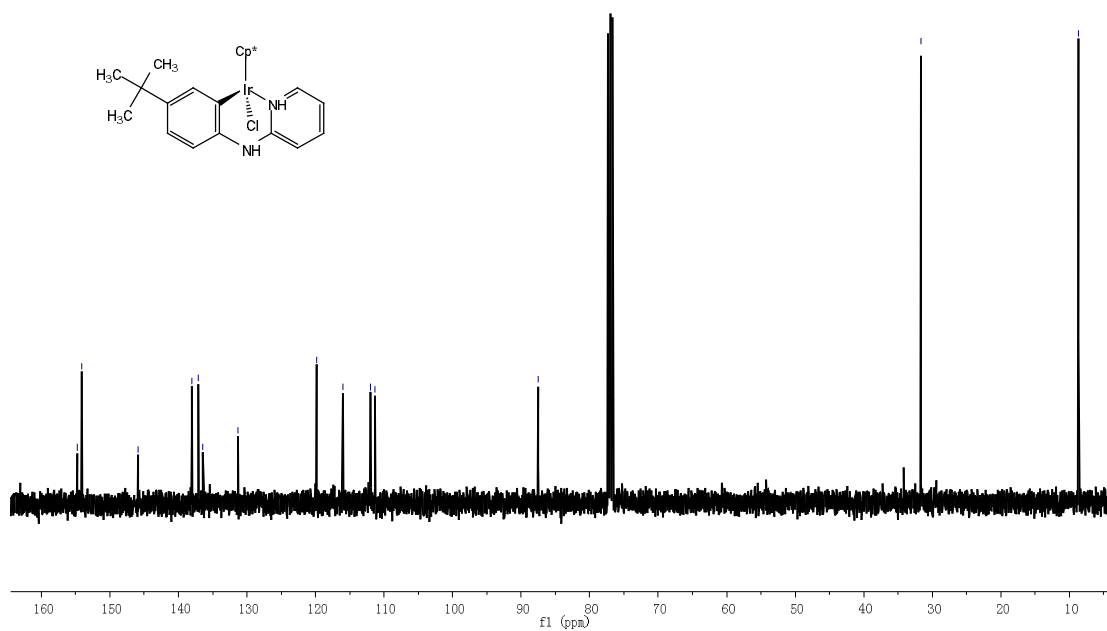

Supplement: c5qo00316d1.pdf [file c5qo00316d1.pdf]
